# Supplementary material for: Synthesis and functional evaluation of proteinogenic amino acid-derived synthetic cannabinoid receptor agonists related to MPP-5F-PICA, MMB-5F-PICA, and MDMB-5F-PICA
Source: Royal Society of Chemistry journal article supplement (doi:10.1039/d3md00758h), 2024-01-01

**Supporting information**

**for**

**Synthesis and functional evaluation of proteinogenic amino acid-derived synthetic cannabinoid  
receptor agonists related to MPP-5F-PICA, MMB-5F-PICA, and MDMB-5F-PICA**

Eric Sparkes,<sup>1,2</sup> Jack W. Markham,<sup>1,2,3</sup> Rochelle Boyd,<sup>1,3</sup> Michael Udoh,<sup>1,3</sup> Rebecca Gordon,<sup>1,3</sup> Humayra Zaman,<sup>4</sup> Katelyn A. Walker,<sup>1,5</sup> Chianna Dane,<sup>2</sup> Richard C. Kevin,<sup>1,5,6</sup> Marina J. Santiago,<sup>4</sup> David E. Hibbs,<sup>3</sup> Samuel D. Banister,<sup>1,2</sup> Adam Ametovski,<sup>1,2</sup> Elizabeth A. Cairns<sup>1,3\*</sup>

<sup>1</sup>Lambert Initiative for Cannabinoid Therapeutics, Brain and Mind Centre, The University of Sydney,  
NSW 2050, Australia;

<sup>2</sup>School of Chemistry, Faculty of Science, The University of Sydney, NSW 2050, Australia;

<sup>3</sup>Sydney Pharmacy School, Faculty of Medicine and Health, The University of Sydney, NSW 2050,  
Australia;

<sup>4</sup>Macquarie Medical School, Faculty of Medicine, Health and Human Sciences, Macquarie University,  
Sydney, NSW 2109, Australia;

<sup>5</sup>School of Psychology, Faculty of Science, The University of Sydney, NSW 2050, Australia;

<sup>5</sup>Department of Clinical Pharmacology and Toxicology, St Vincent's Hospital Sydney, Sydney, NSW  
2010, Australia;

<sup>6</sup>School of Clinical Medicine, The University of New South Wales, Sydney, NSW 2052, Australia.

**Figure S1.**  $^1\text{H}$  and  $^{13}\text{C}$  NMR spectra for methyl (1-(5-fluoropentyl)-1*H*-indole-3-carbonyl)glycinate (GLY-5F-PICA, **16**).

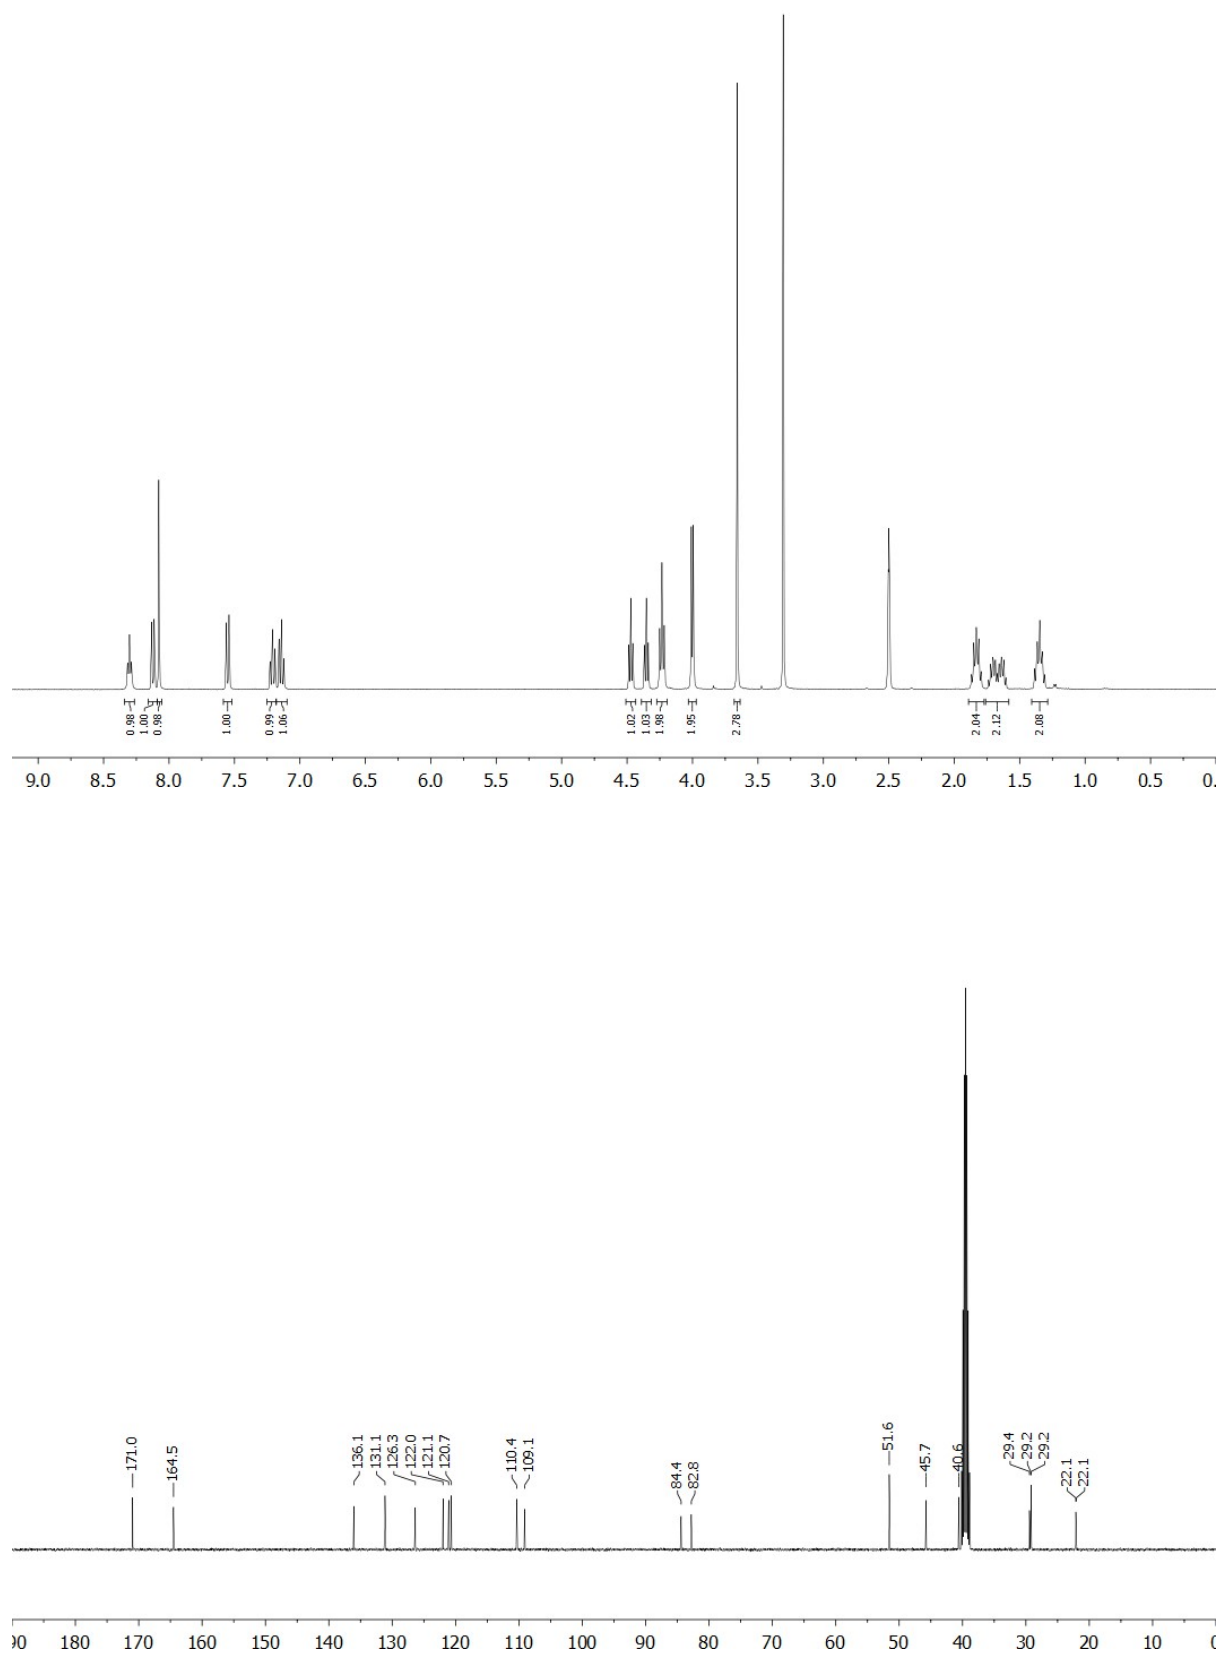

**Figure S2.**  $^1\text{H}$  and  $^{13}\text{C}$  NMR spectra for methyl (1-(5-fluoropentyl)-1*H*-indole-3-carbonyl)-*S*-alaninate (*S*-ALA-5F-PICA, **17**).

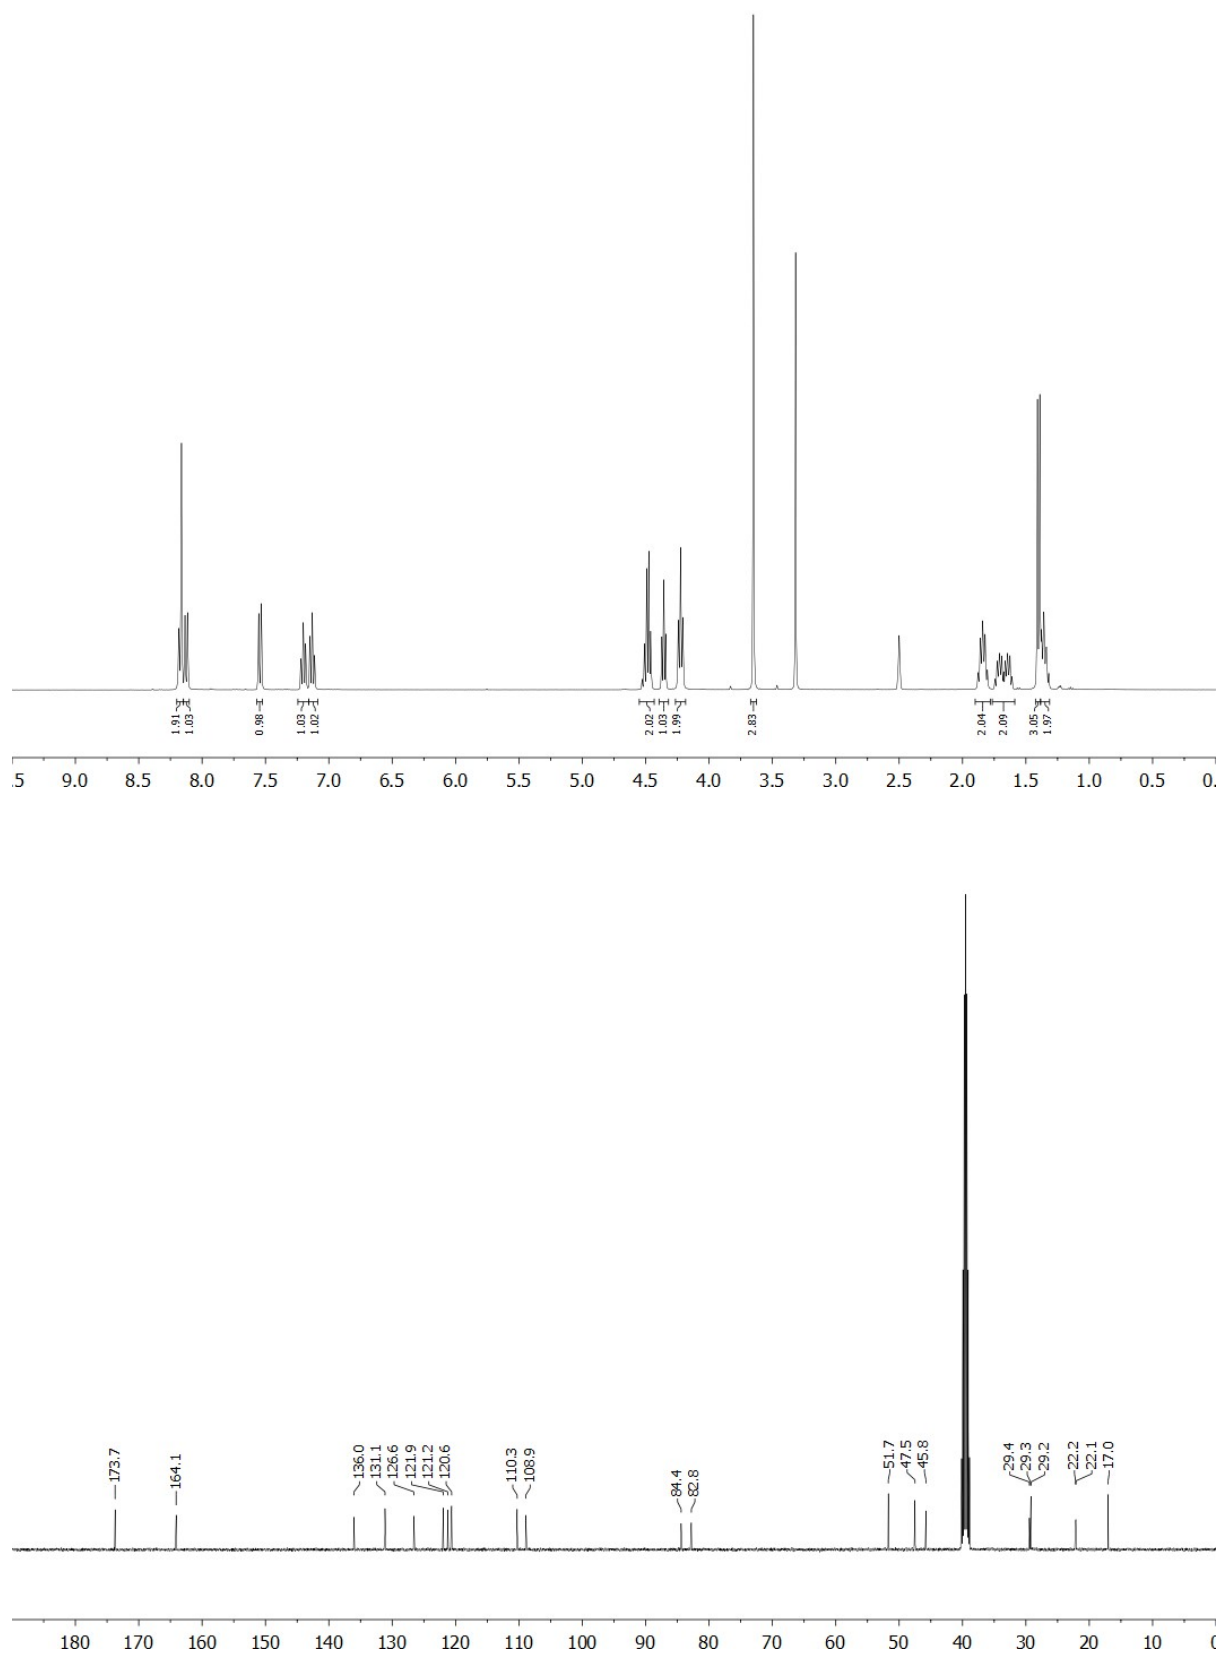

**Figure S3.**  $^1\text{H}$  and  $^{13}\text{C}$  NMR spectra for methyl (1-(5-fluoropentyl)-1*H*-indole-3-carbonyl)-*R*-alaninate (*R*-ALA-5F-PICA, **18**).

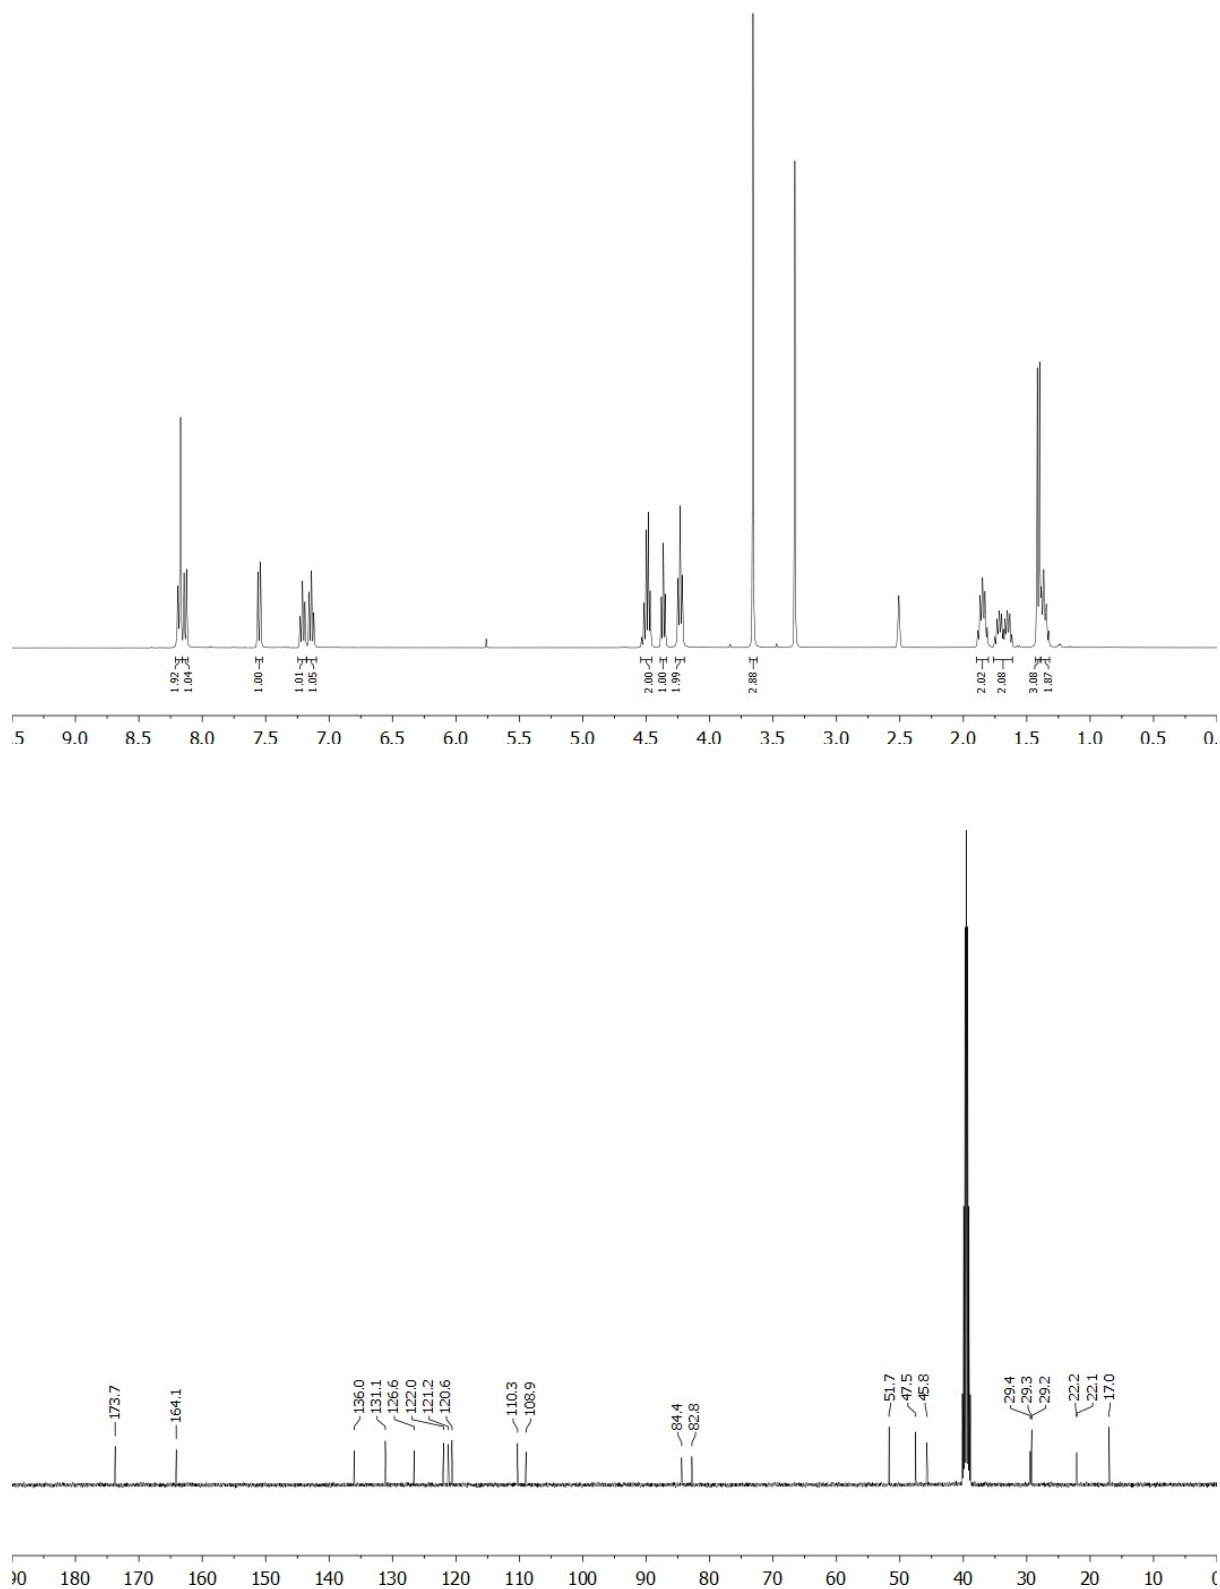

**Figure S4.**  $^1\text{H}$  and  $^{13}\text{C}$  NMR spectra for methyl (1-(5-fluoropentyl)-1*H*-indole-3-carbonyl)-*R*-valinate (*R*-MMB-5F-PICA, **20**).

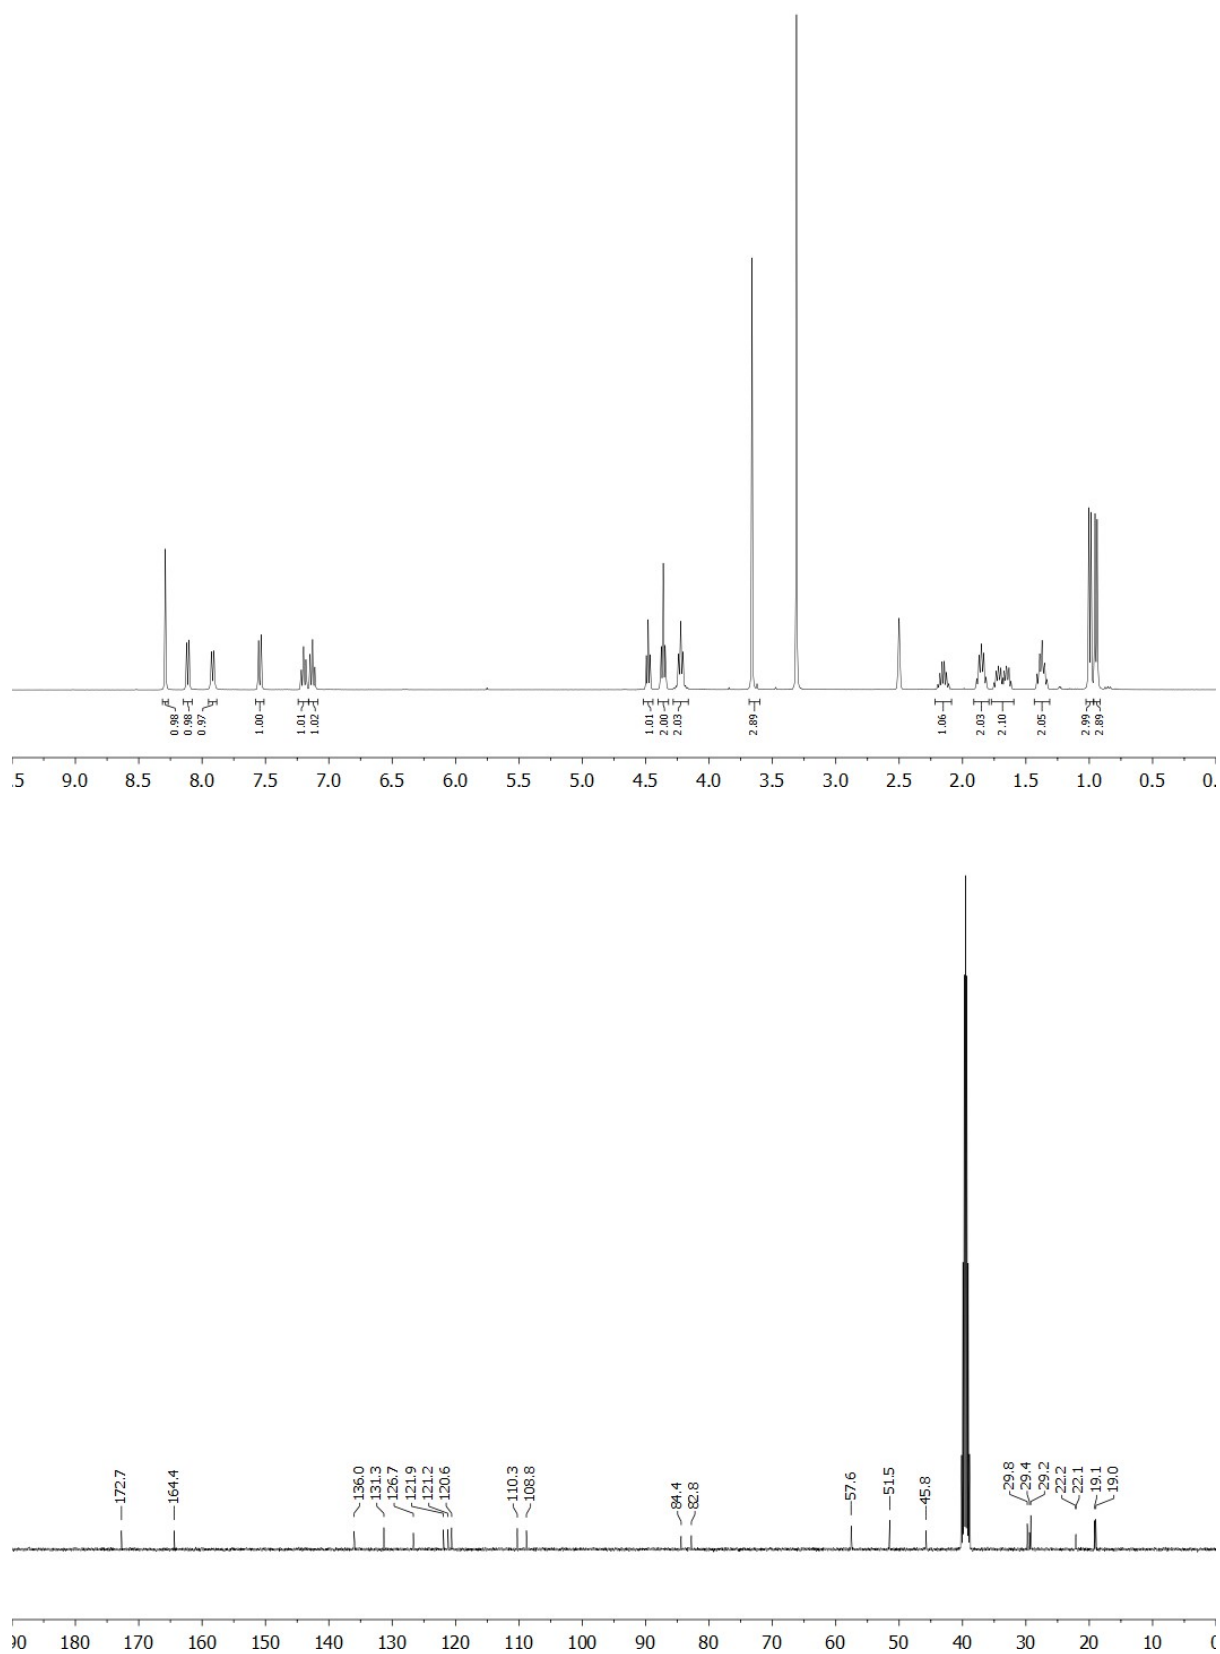

**Figure S5.**  $^1\text{H}$  and  $^{13}\text{C}$  NMR spectra for methyl (1-(5-fluoropentyl)-1*H*-indole-3-carbonyl)-*S*-serinate (*S*-SER-5F-PICA, **21**).

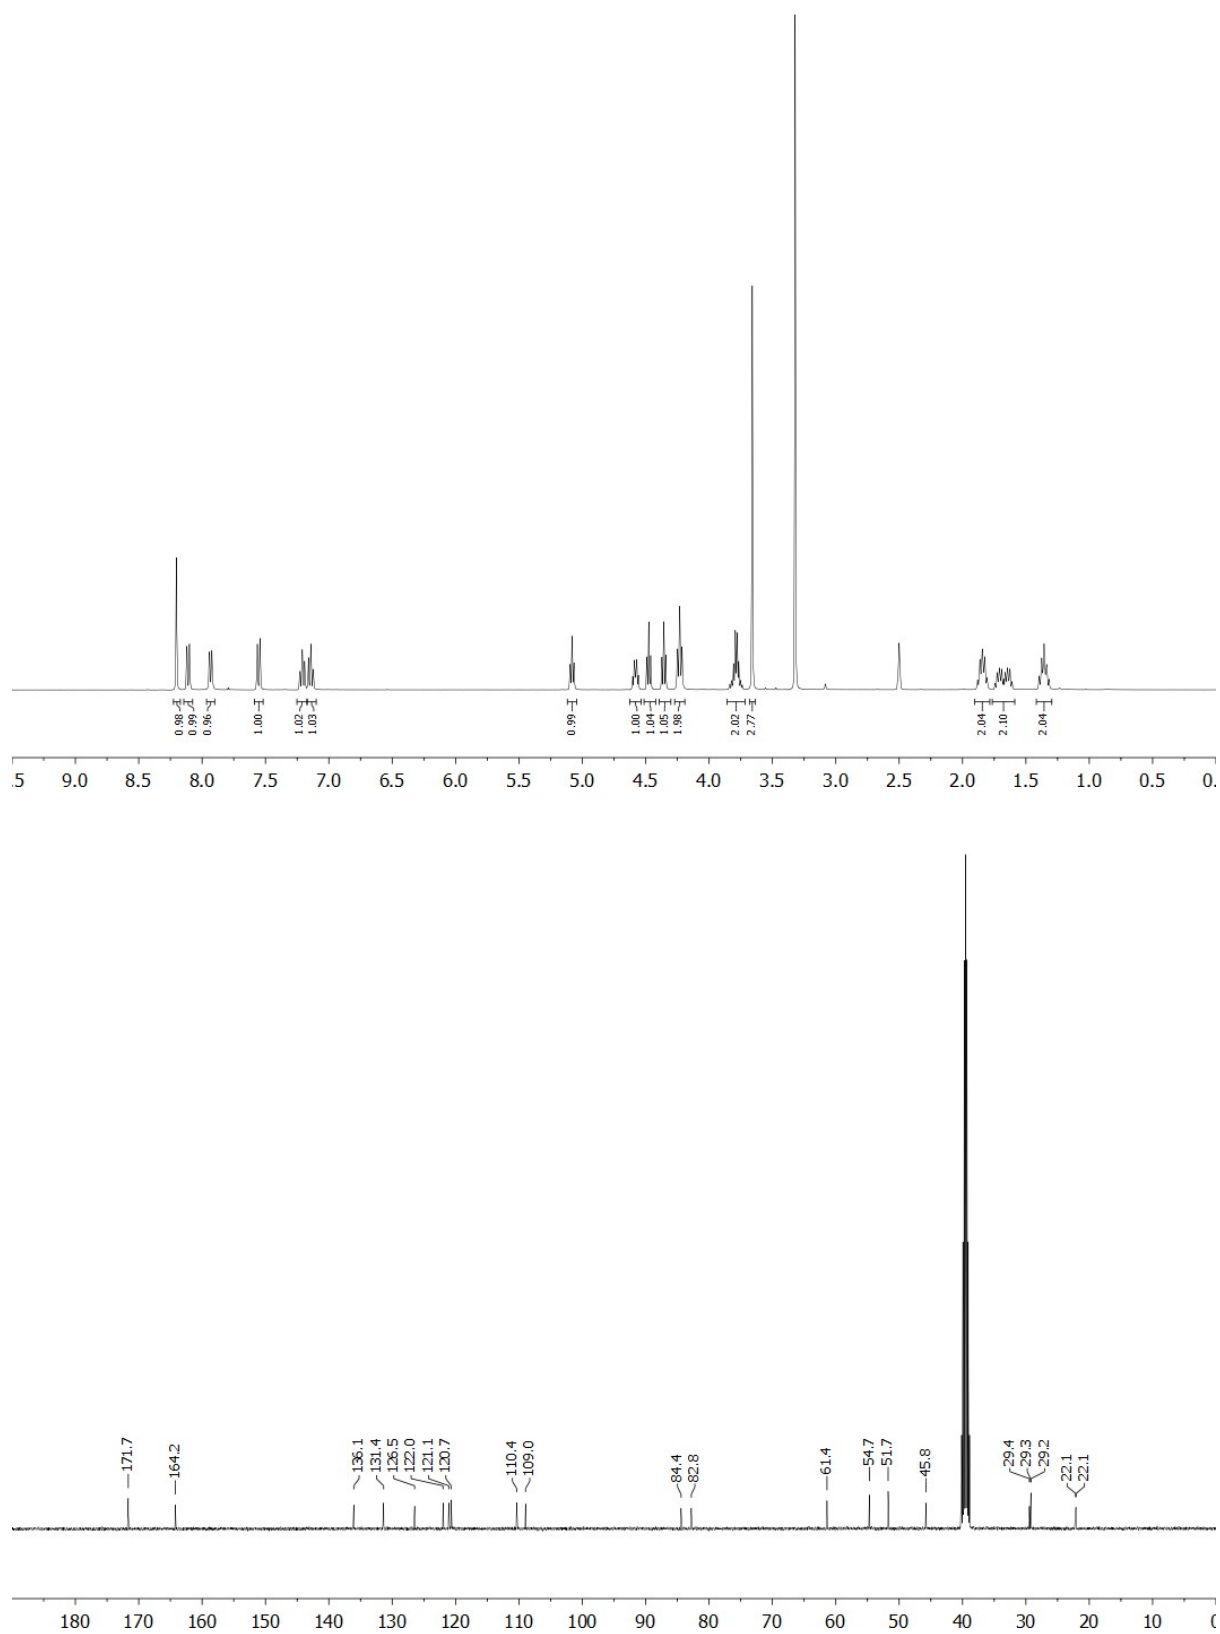

**Figure S6.**  $^1\text{H}$  and  $^{13}\text{C}$  NMR spectra for methyl (1-(5-fluoropentyl)-1*H*-indole-3-carbonyl)-*R*-serinate (*R*-SER-5F-PICA, **22**).

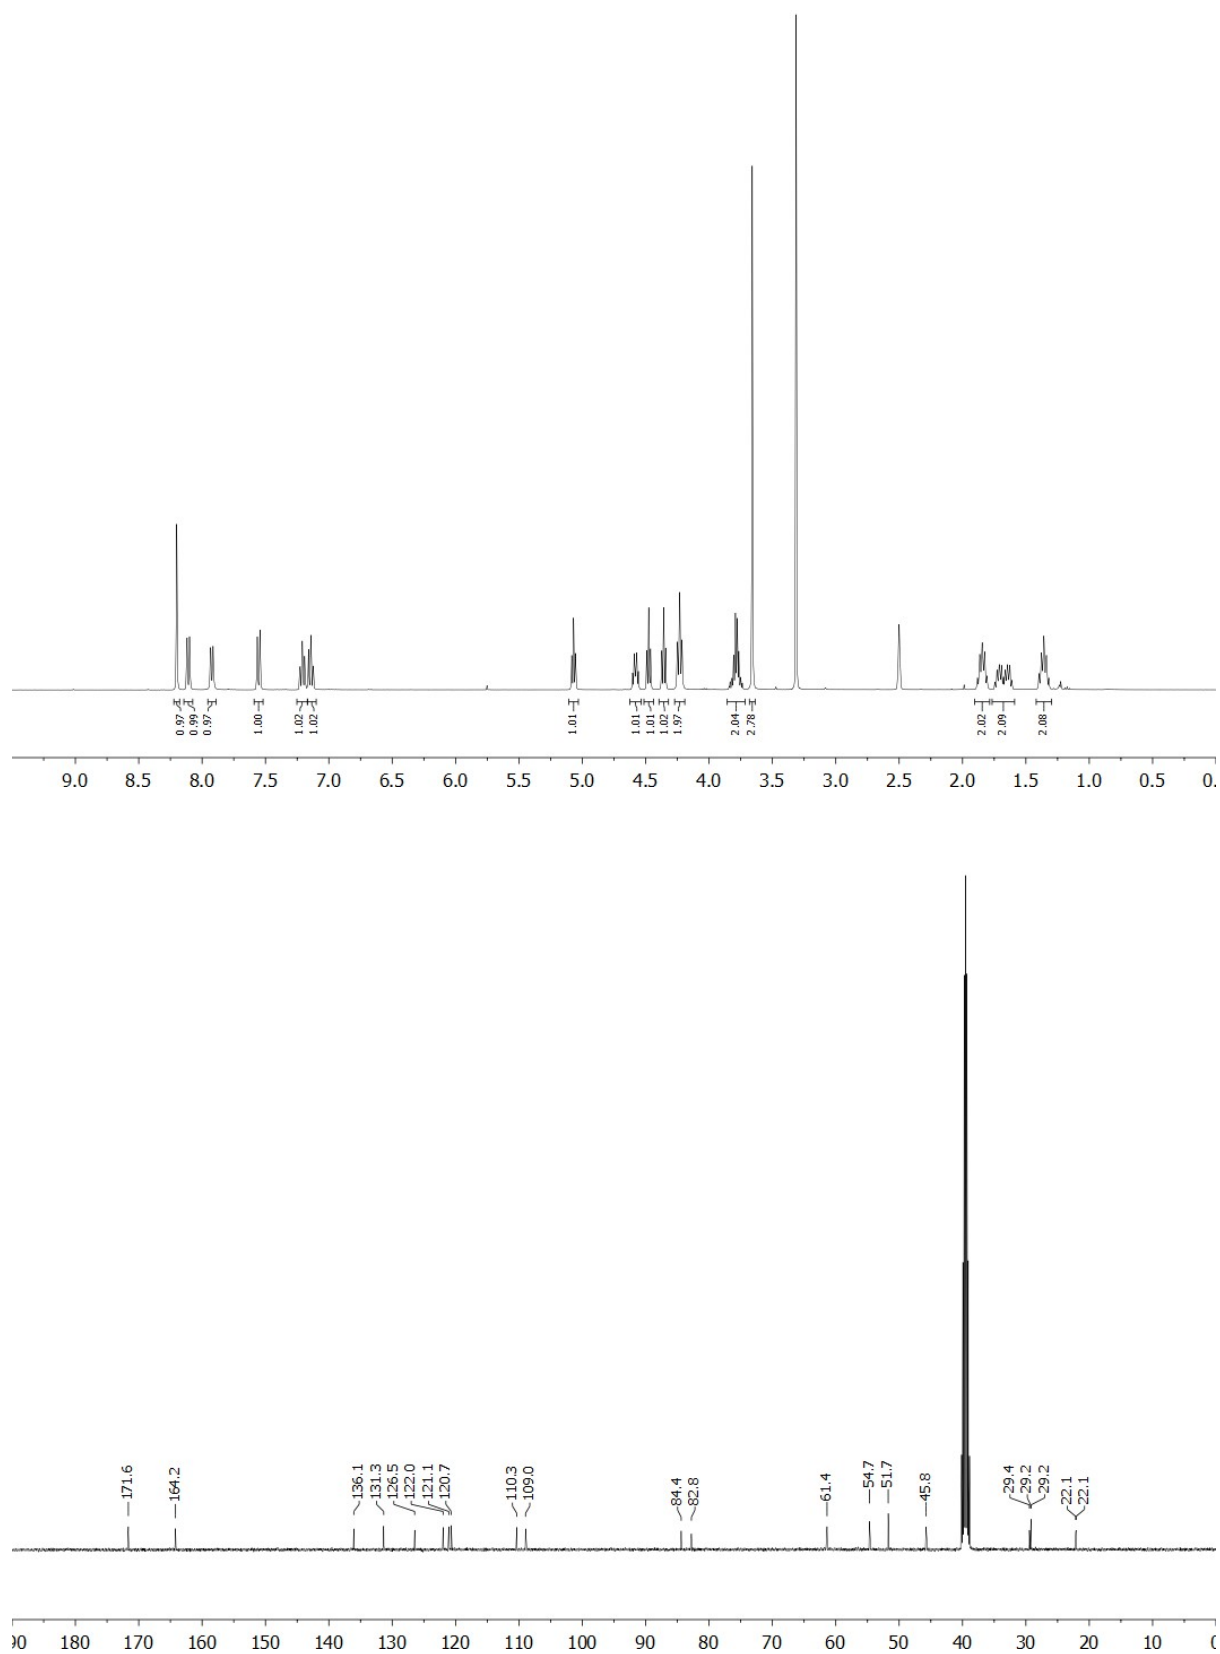

**Figure S7.**  $^1\text{H}$  and  $^{13}\text{C}$  NMR spectra for methyl (1-(5-fluoropentyl)-1*H*-indole-3-carbonyl)-2*S*,3*R*-threoninate (2*S*,3*R*-THR-5F-PICA, **23**).

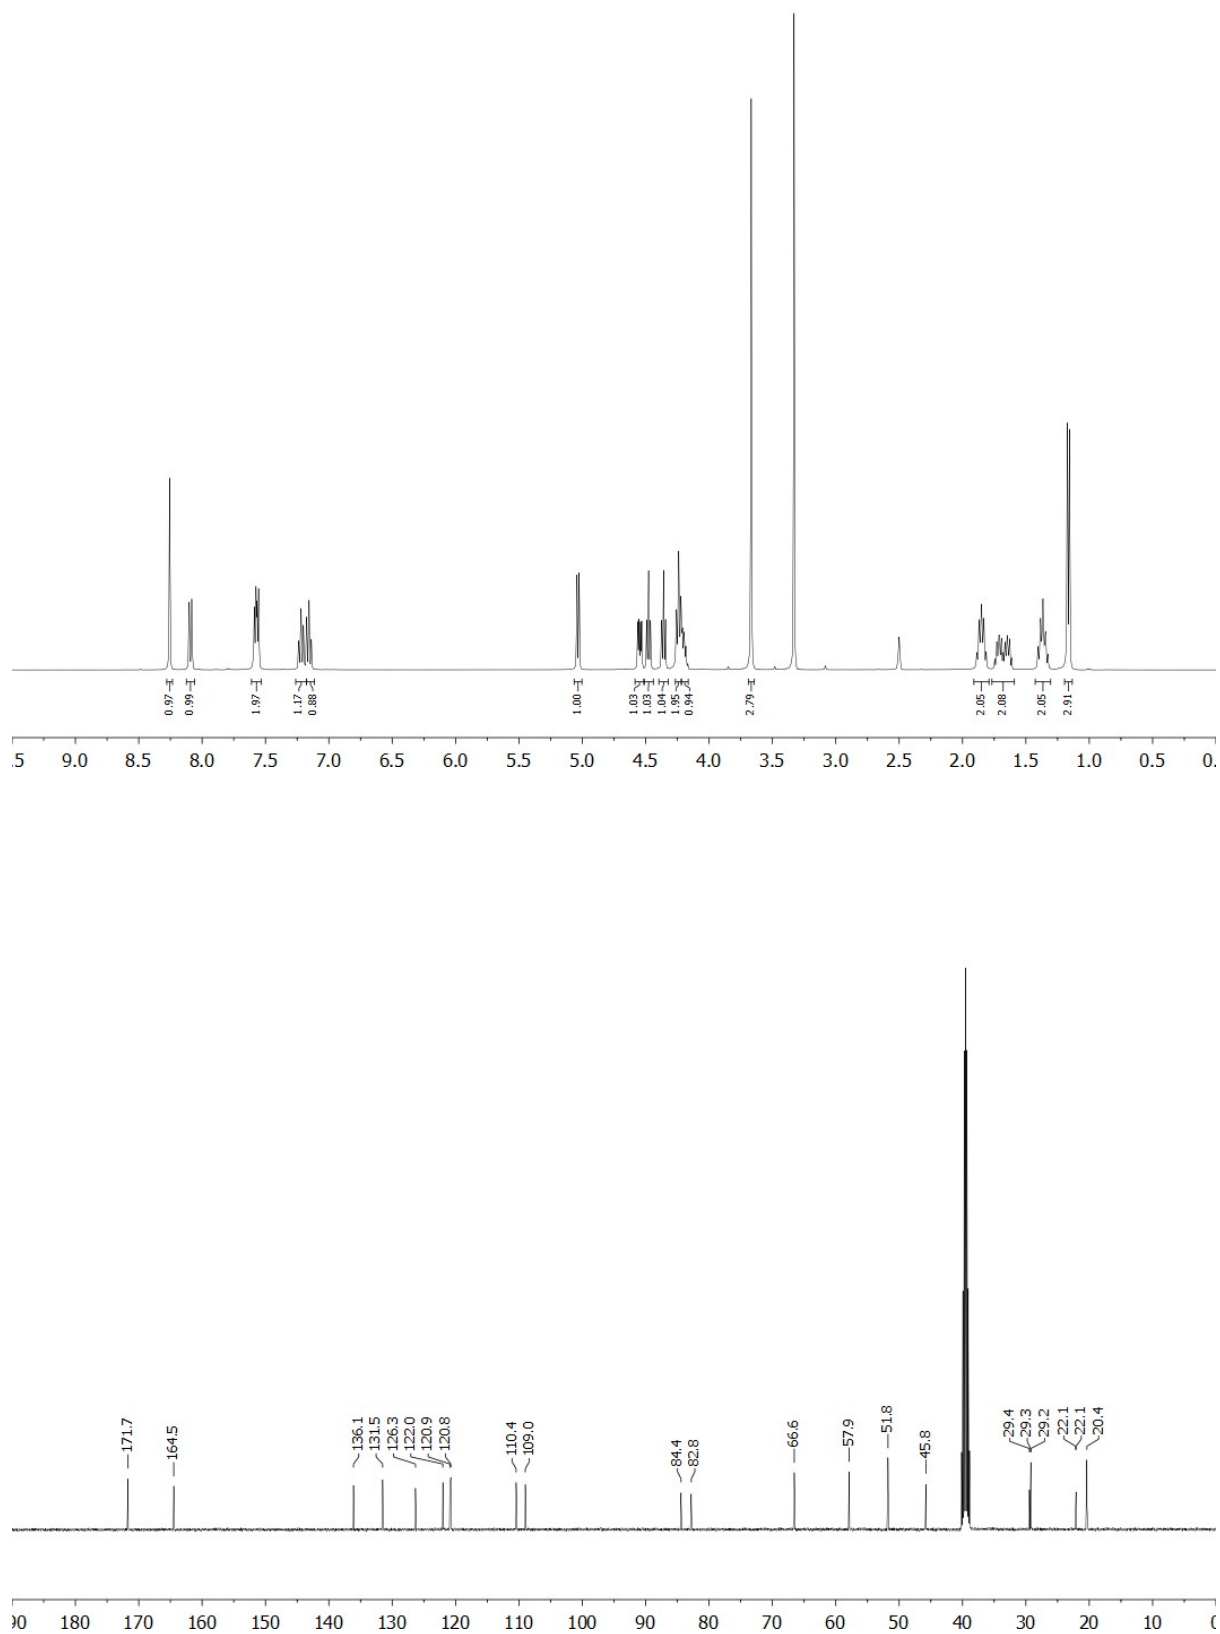



**Figure S8.**  $^1\text{H}$  and  $^{13}\text{C}$  NMR spectra for methyl (1-(5-fluoropentyl)-1*H*-indole-3-carbonyl)-2*R*,3*S*-threoninate (2*R*,3*S*-THR-5F-PICA, **24**).

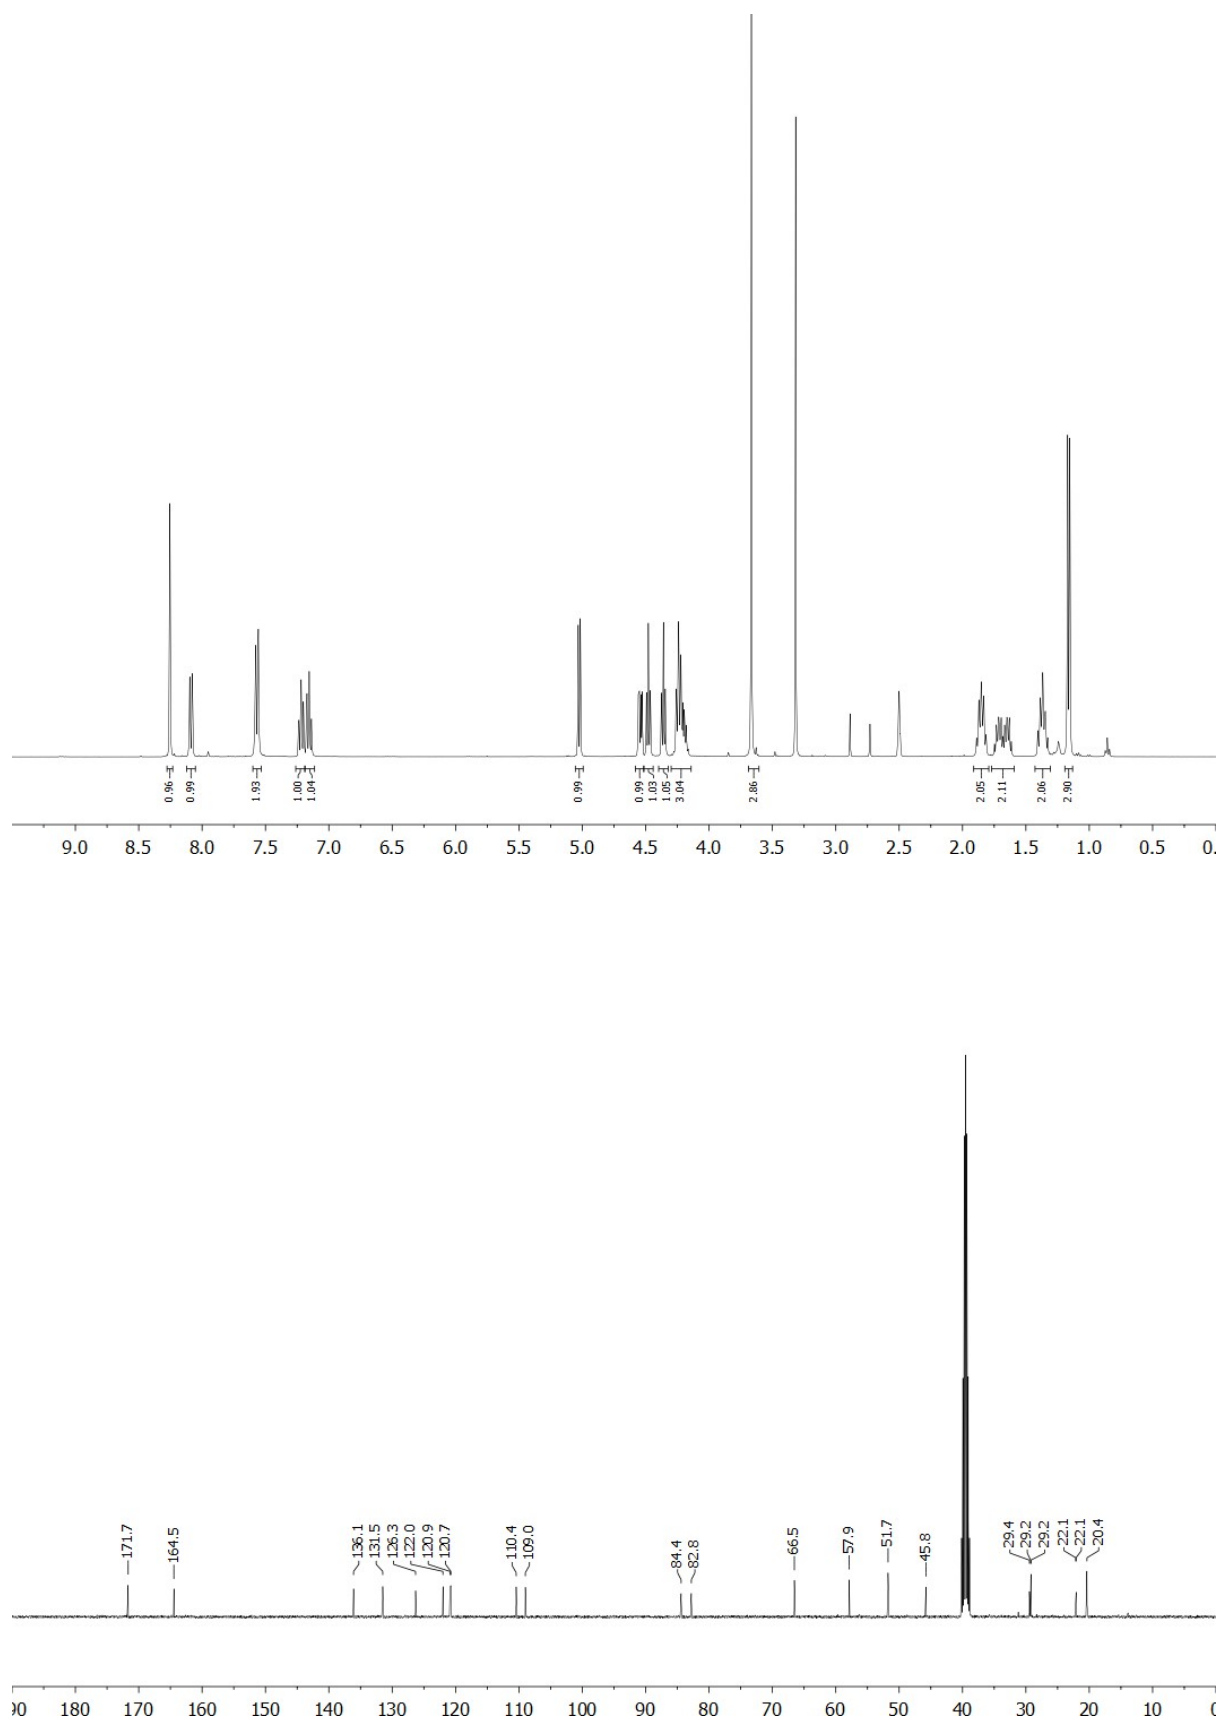

**Figure S9.**  $^1\text{H}$  and  $^{13}\text{C}$  NMR spectra for methyl (1-(5-fluoropentyl)-1*H*-indole-3-carbonyl)-*S*-prolinate (*S*-PRO-5F-PICA, **25**).

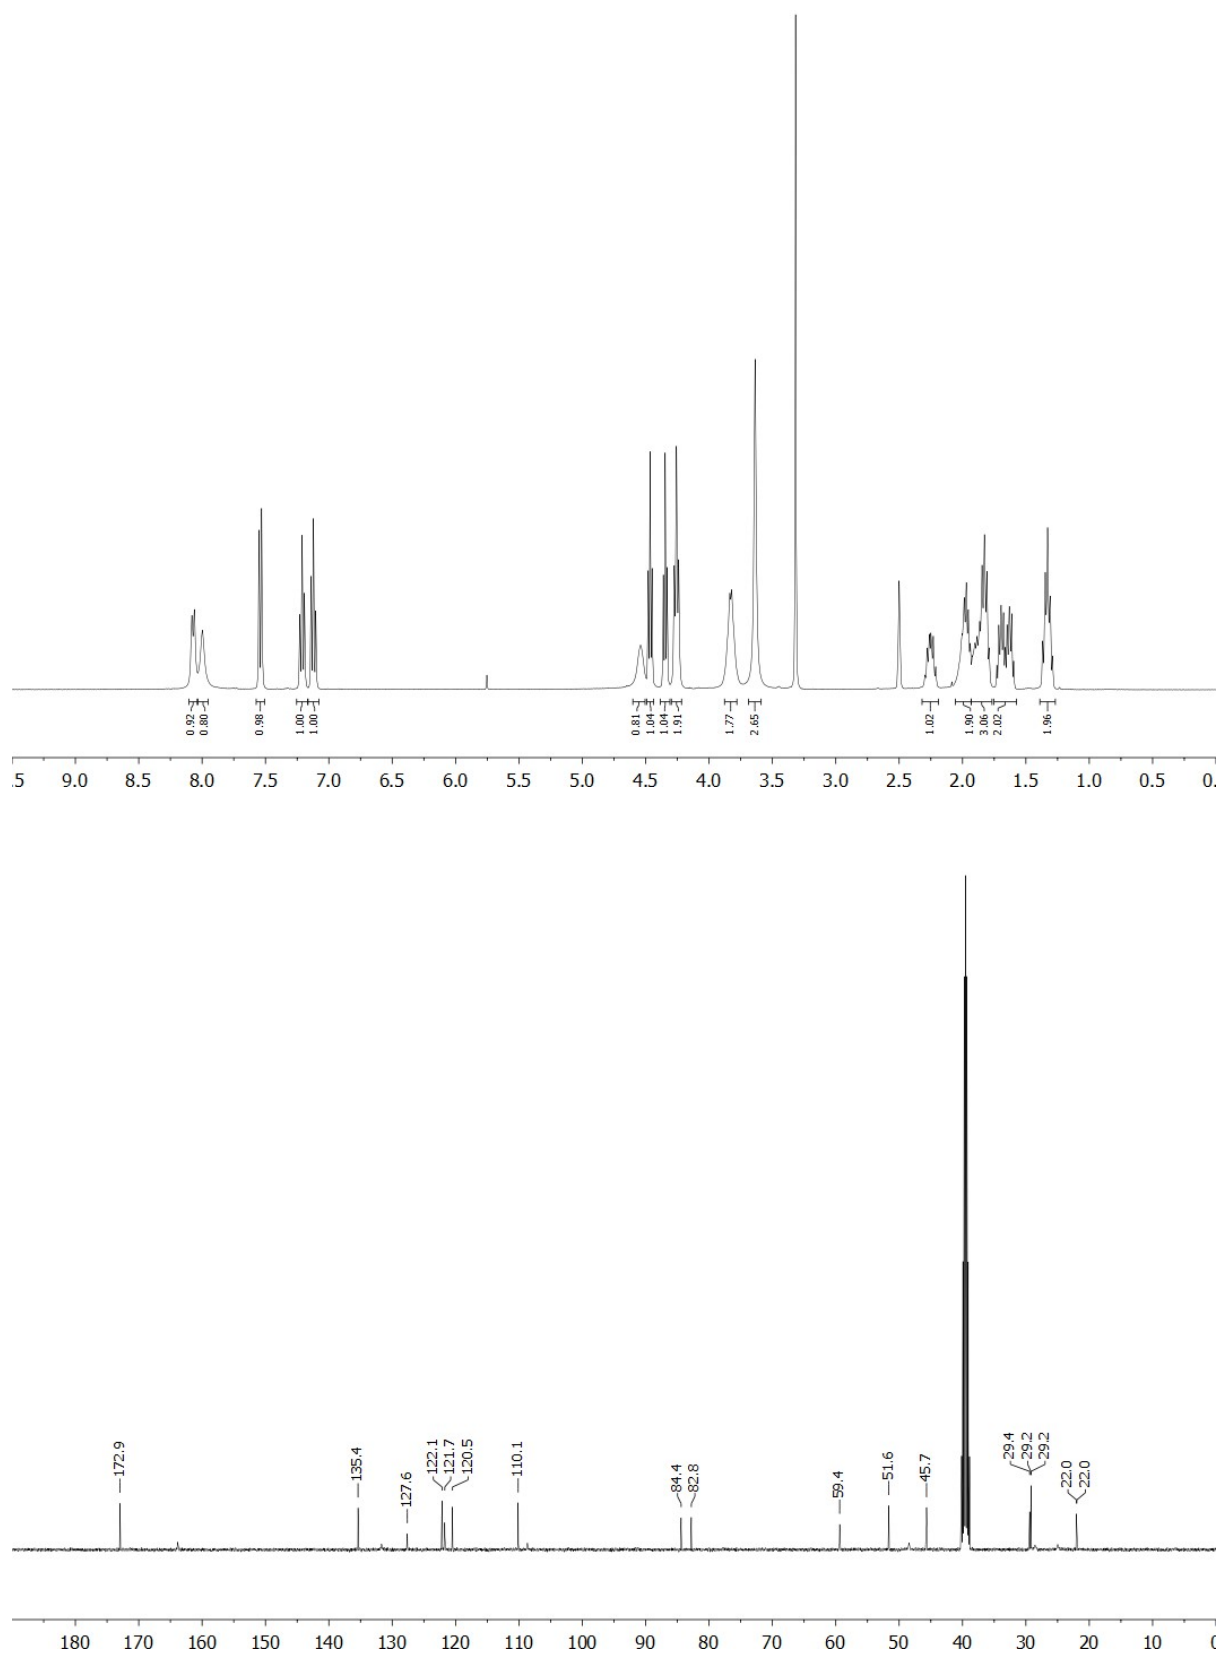

**Figure S10.**  $^1\text{H}$  and  $^{13}\text{C}$  NMR spectra for methyl (1-(5-fluoropentyl)-1*H*-indole-3-carbonyl)-*R*-prolinate (*R*-PRO-5F-PICA, **26**).

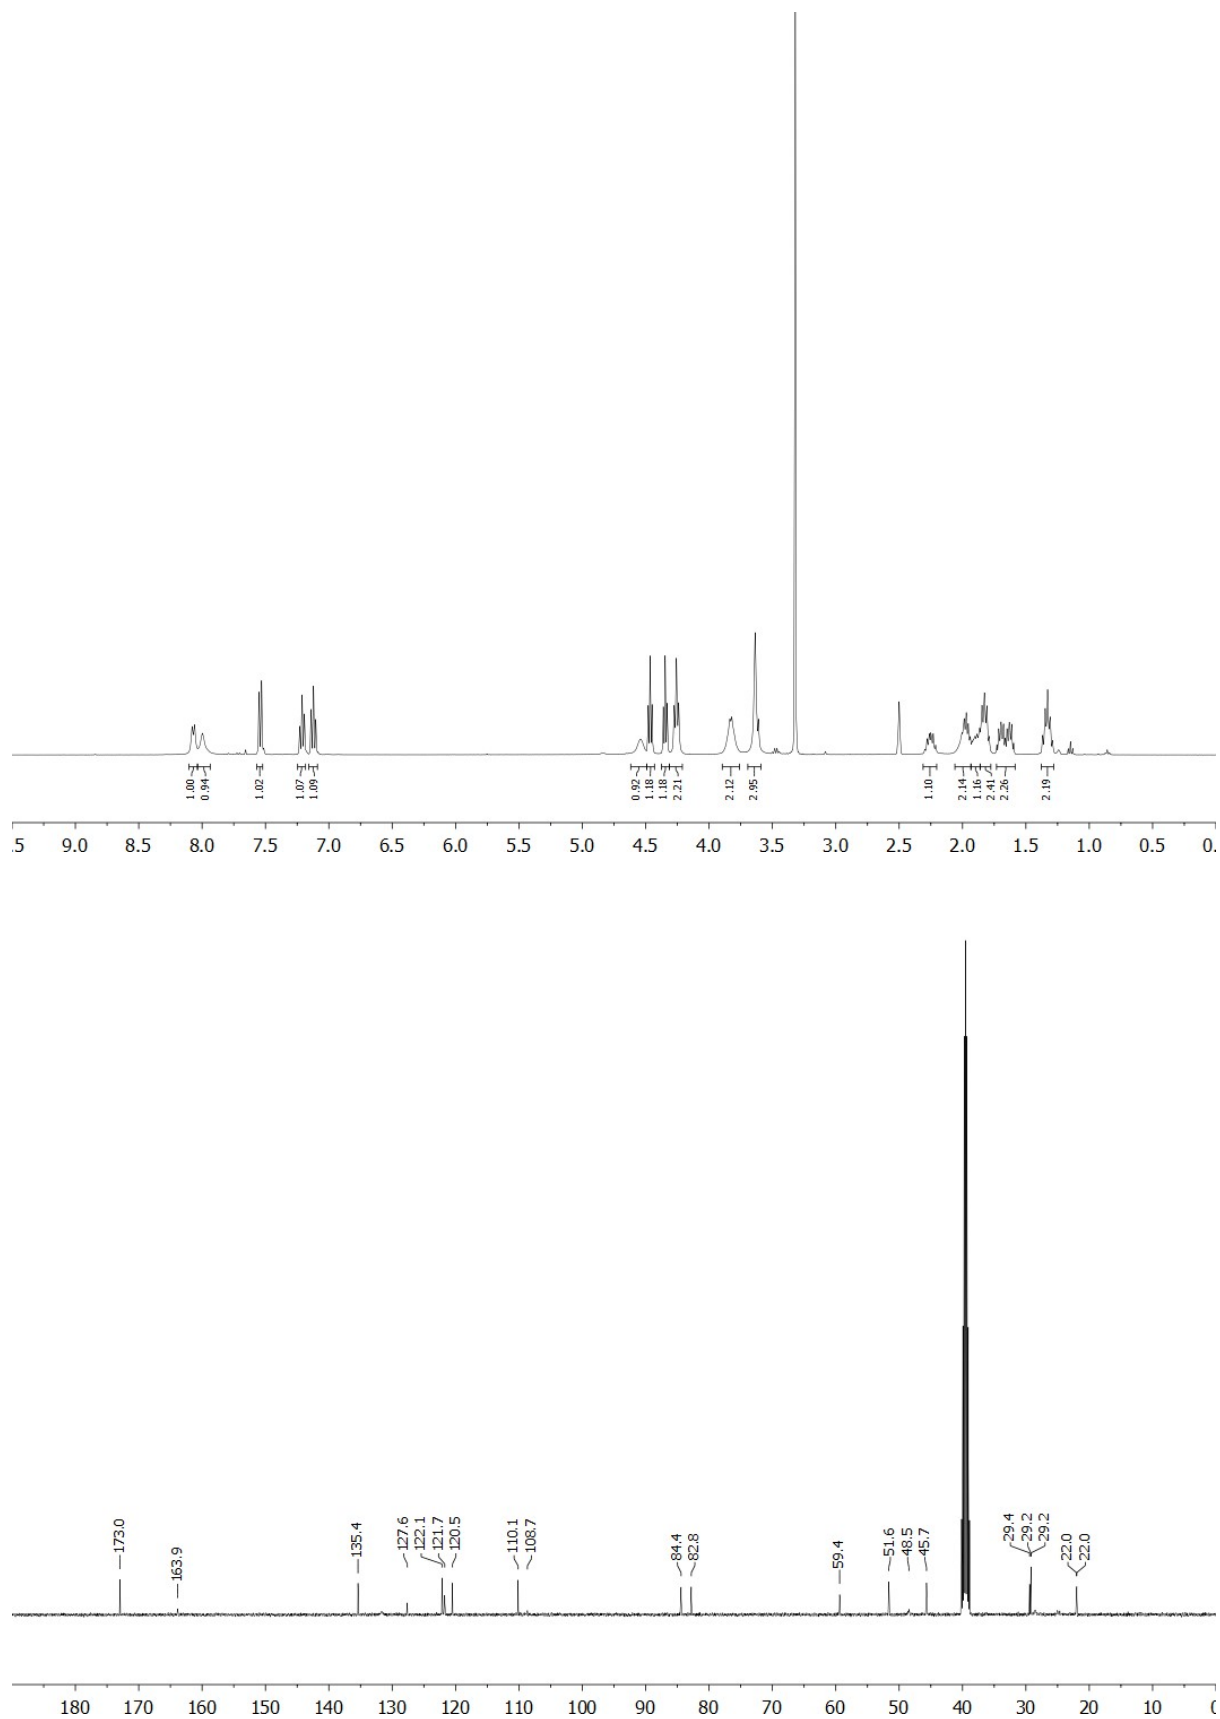

**Figure S11.**  $^1\text{H}$  and  $^{13}\text{C}$  NMR spectra for methyl (1-(5-fluoropentyl)-1*H*-indole-3-carbonyl)-*S*-leucinate (*S*-LEU-5F-PICA, **27**).

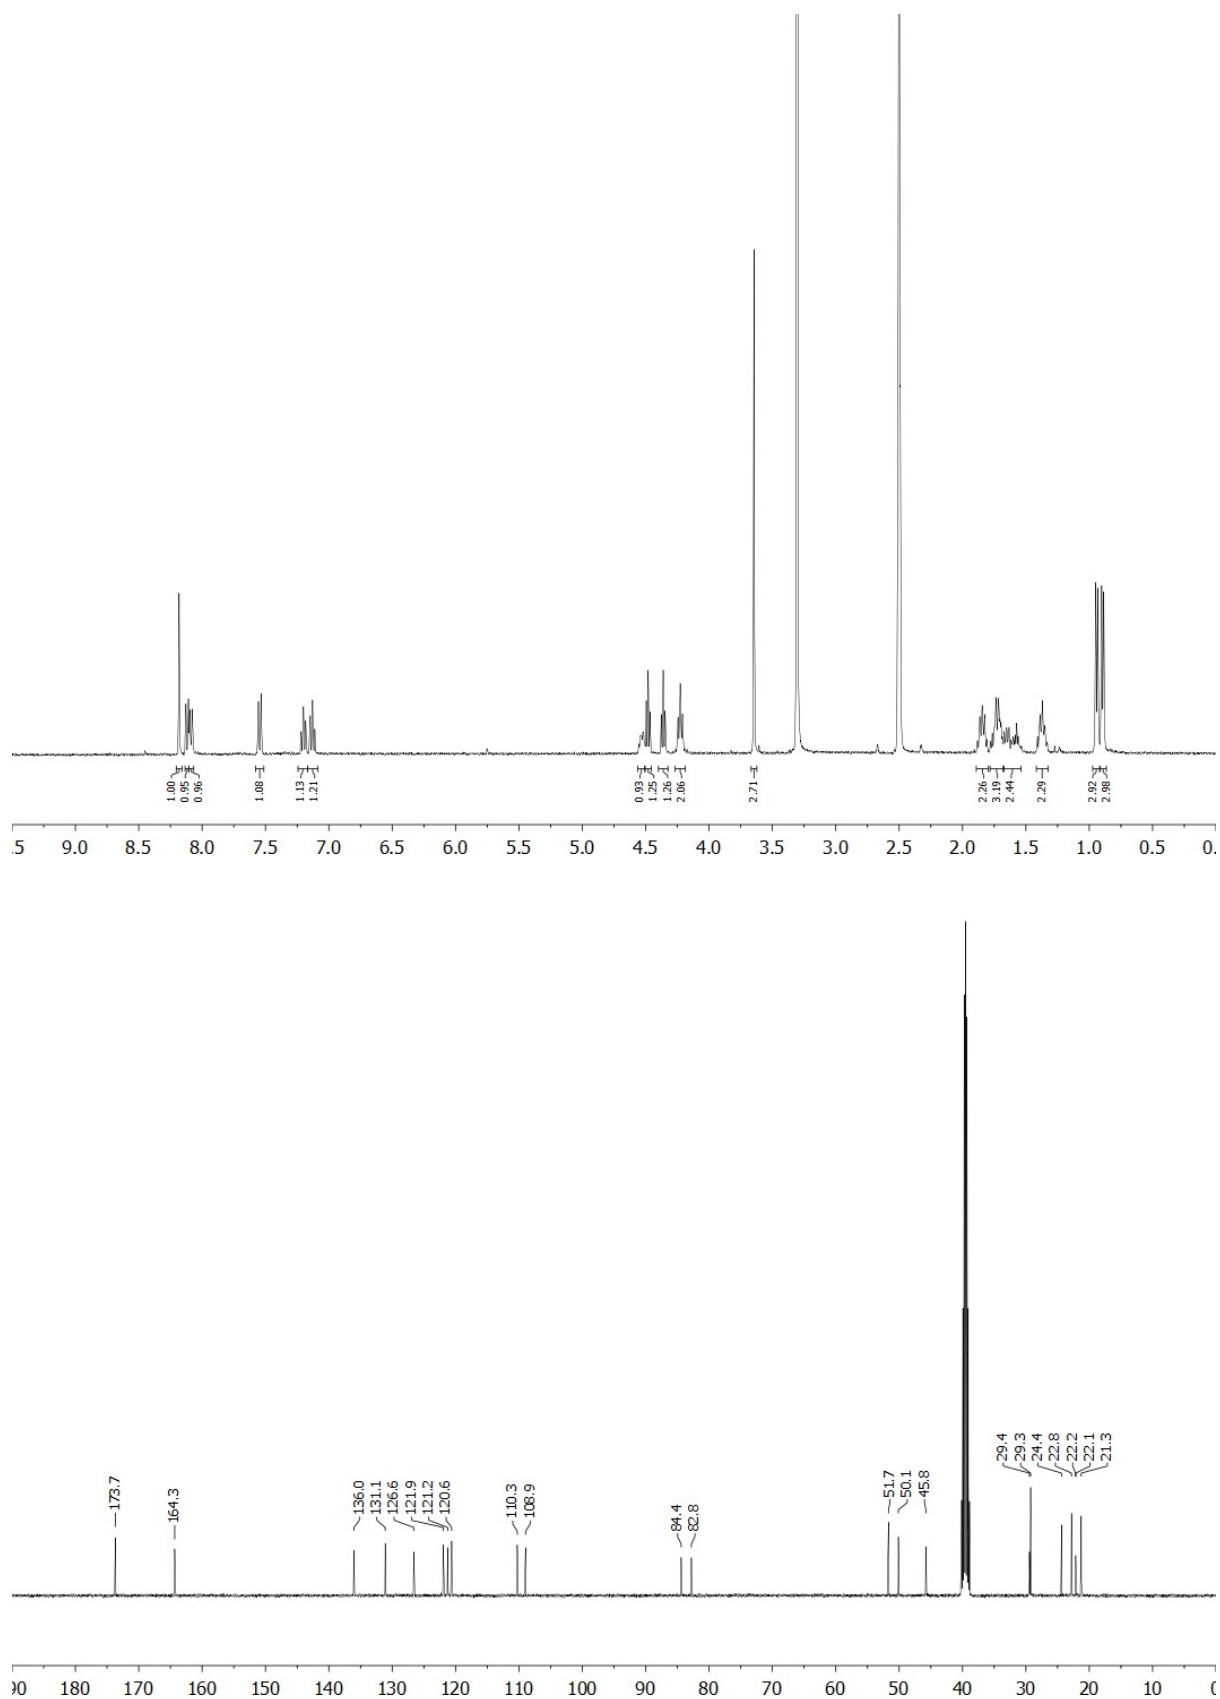

**Figure S12.**  $^1\text{H}$  and  $^{13}\text{C}$  NMR spectra for methyl (1-(5-fluoropentyl)-1*H*-indole-3-carbonyl)-*R*-leucinate (*R*-LEU-5F-PICA, **28**).

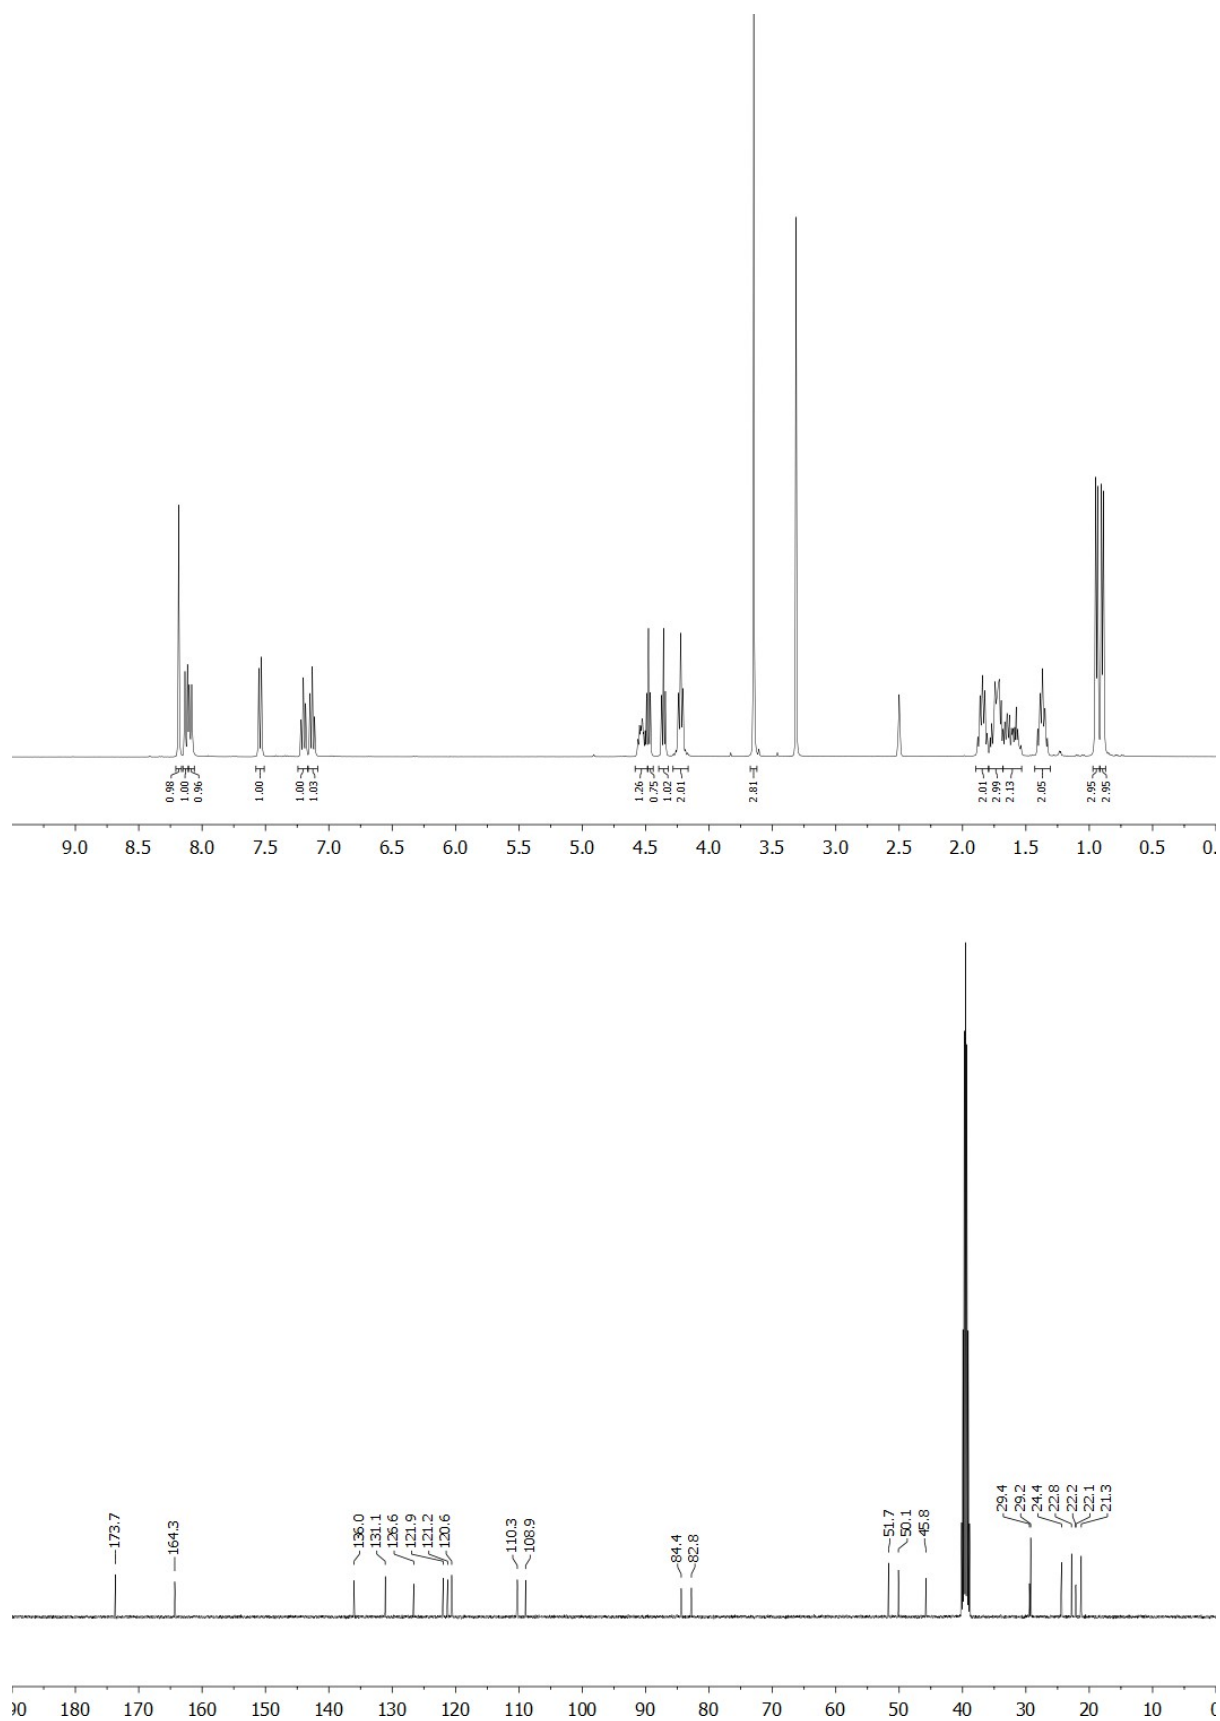

**Figure S13.**  $^1\text{H}$  and  $^{13}\text{C}$  NMR spectra for methyl (1-(5-fluoropentyl)-1*H*-indole-3-carbonyl)-*S*-isoleucinate (*S*-ILE-5F-PICA, **29**).

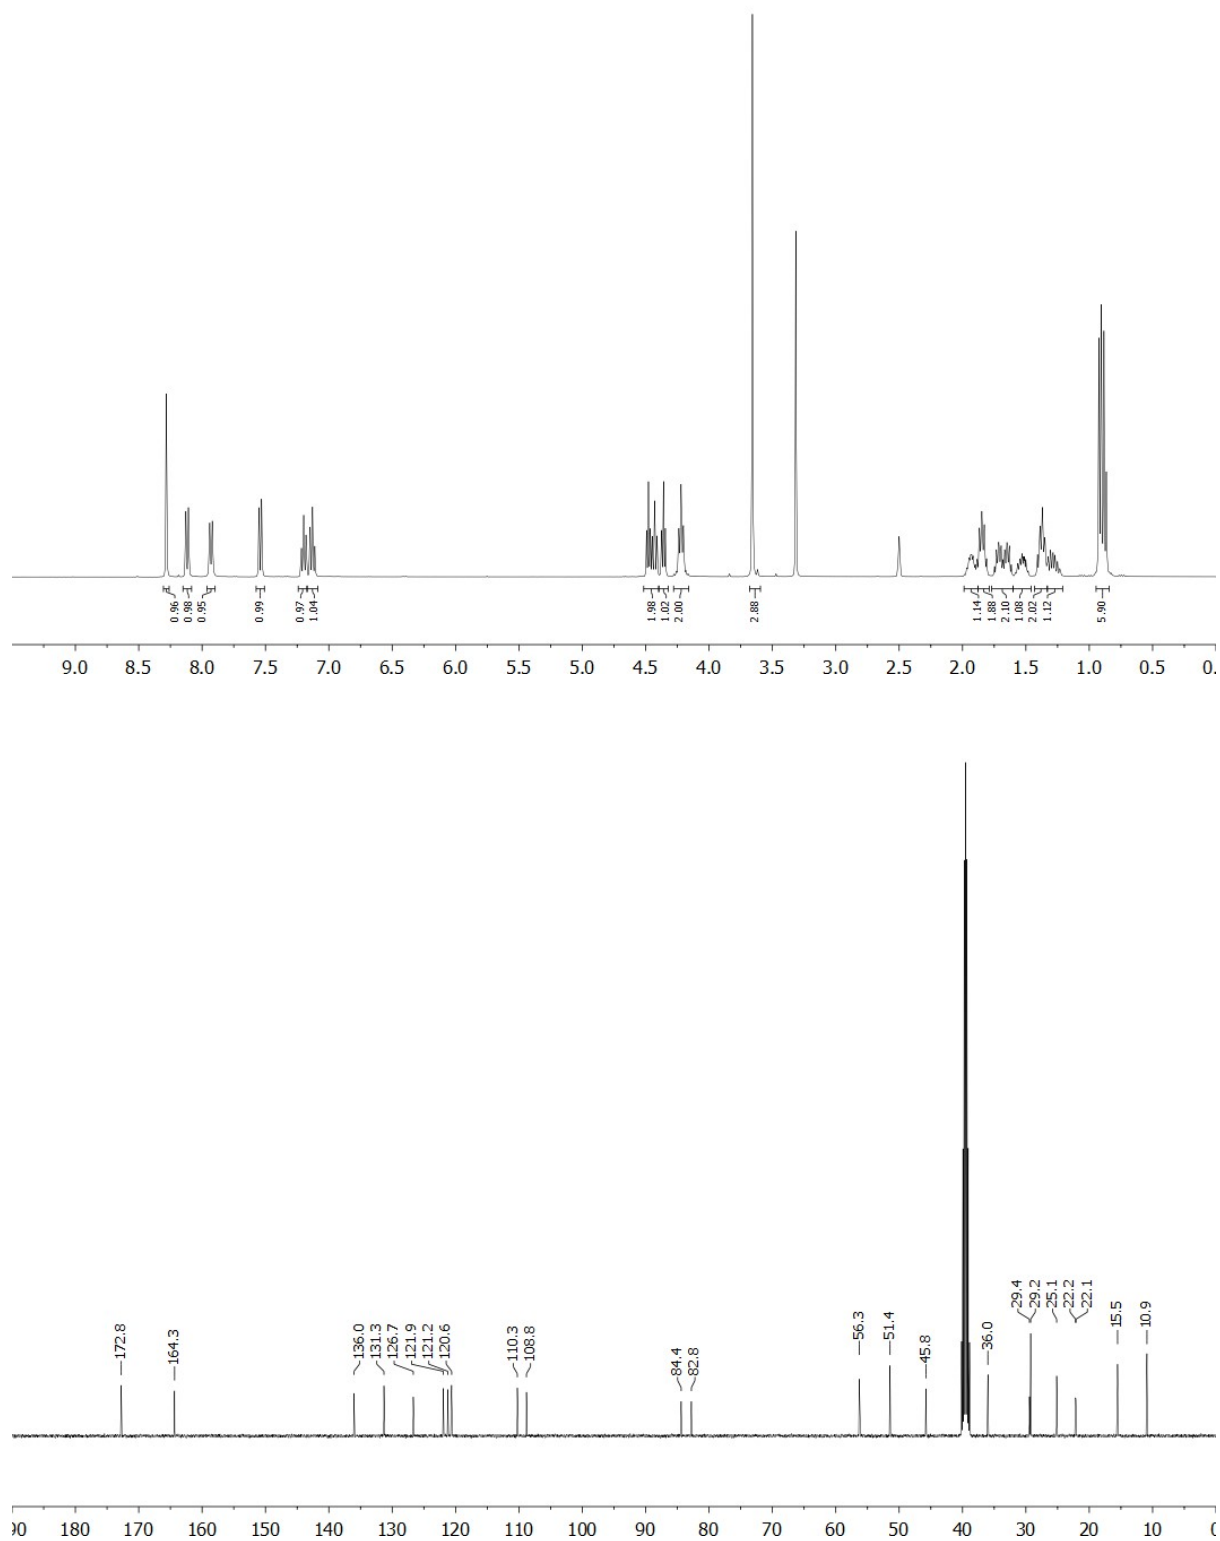

**Figure S14.**  $^1\text{H}$  and  $^{13}\text{C}$  NMR spectra for methyl (1-(5-fluoropentyl)-1*H*-indole-3-carbonyl)-*R*-isoleucinate (*R*-ILE-5F-PICA, **30**).

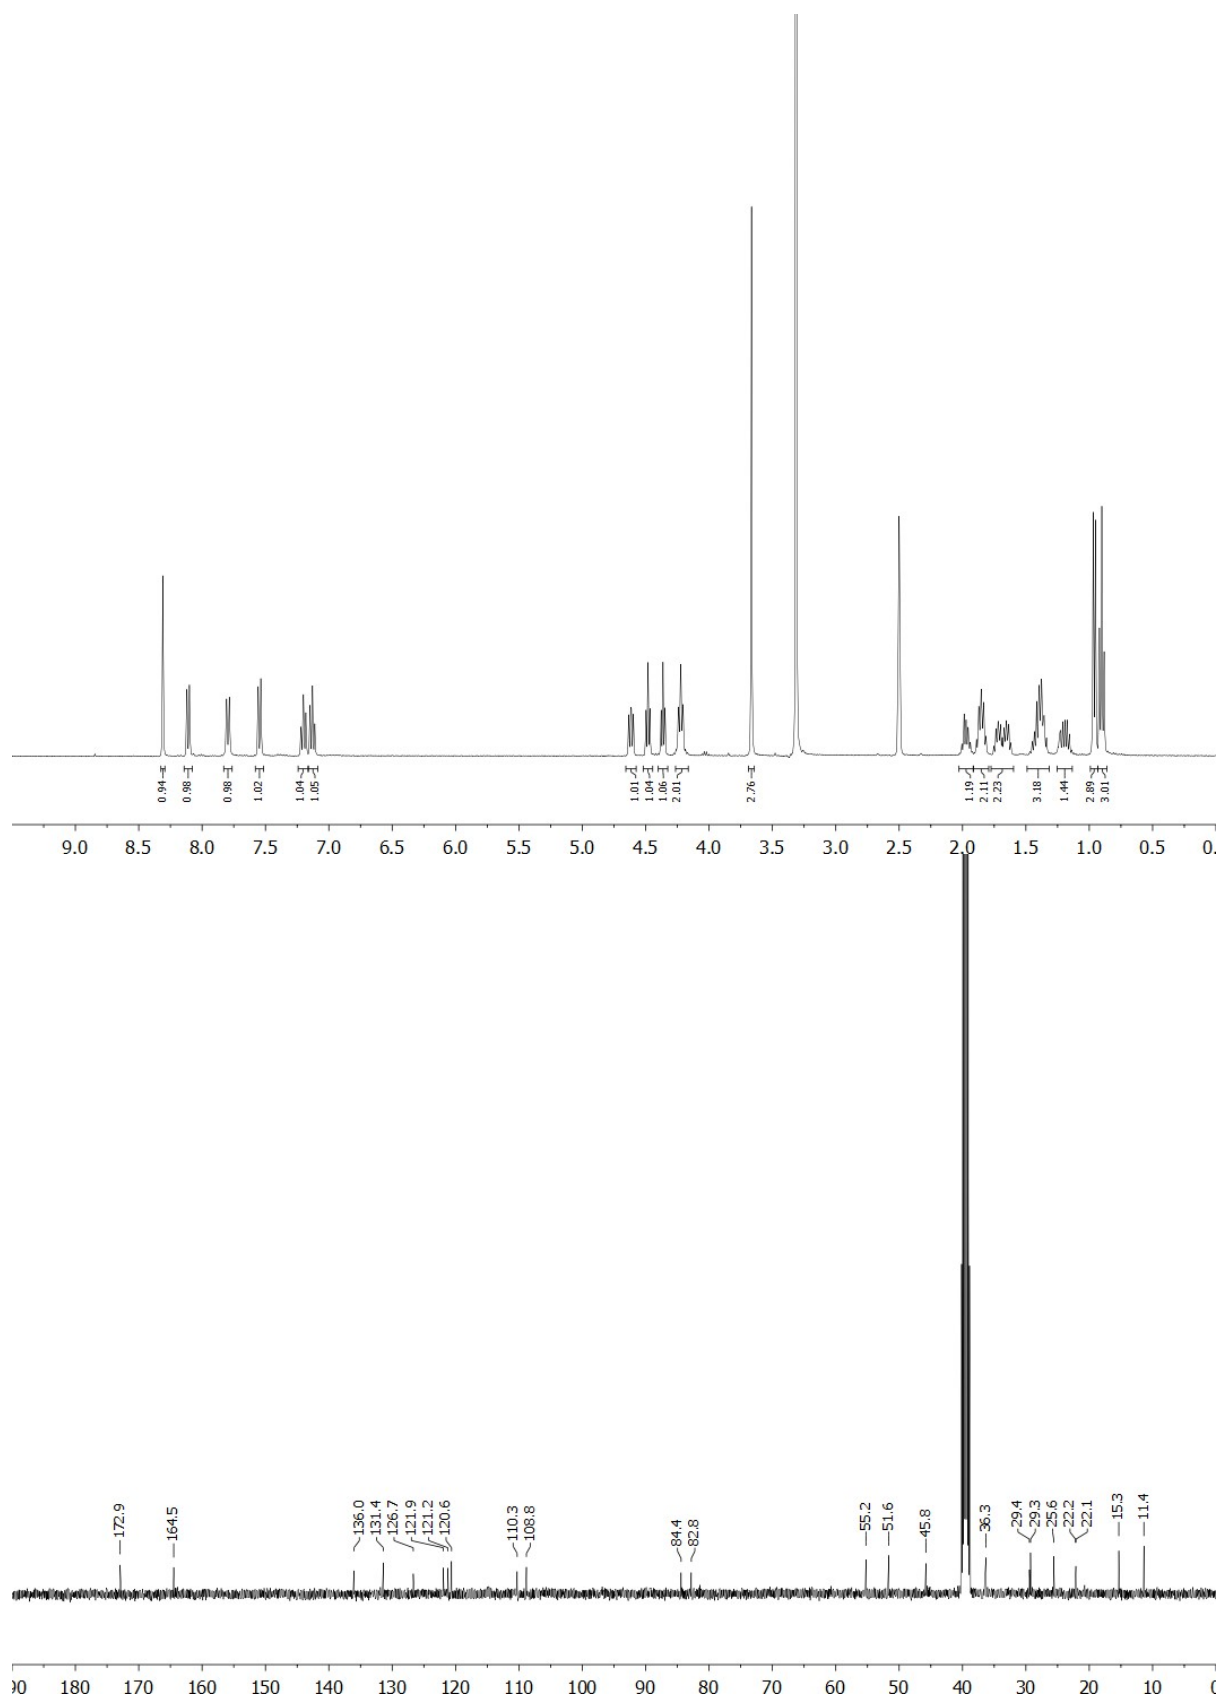

**Figure S15.**  $^1\text{H}$  and  $^{13}\text{C}$  NMR spectra for methyl (*R*)-2-(1-(5-fluoropentyl)-1*H*-indole-3-carboxamido)-3,3-dimethylbutanoate (*R*-MDMB-5F-PICA, **32**).

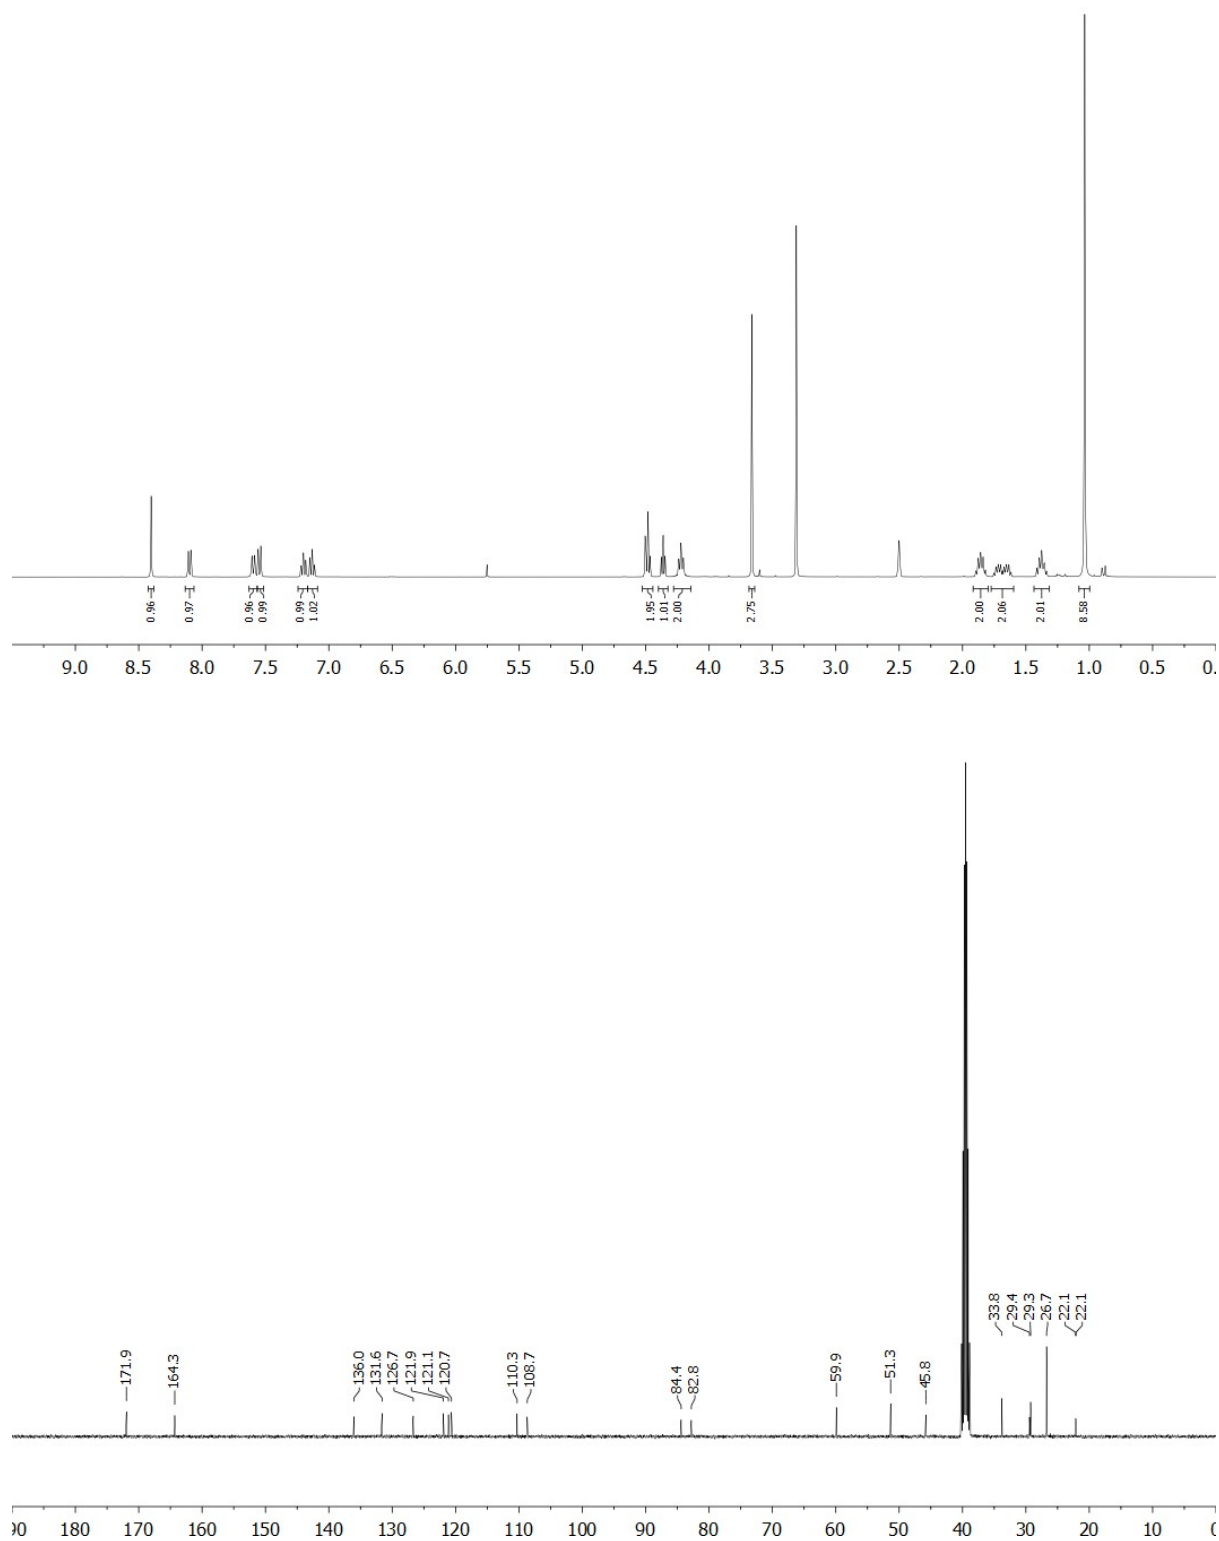



**Figure S16.**  $^1\text{H}$  and  $^{13}\text{C}$  NMR spectra for methyl (1-(5-fluoropentyl)-1*H*-indole-3-carbonyl)-*R*-phenylalaninate (*R*-MPP-5F-PICA, **34**).

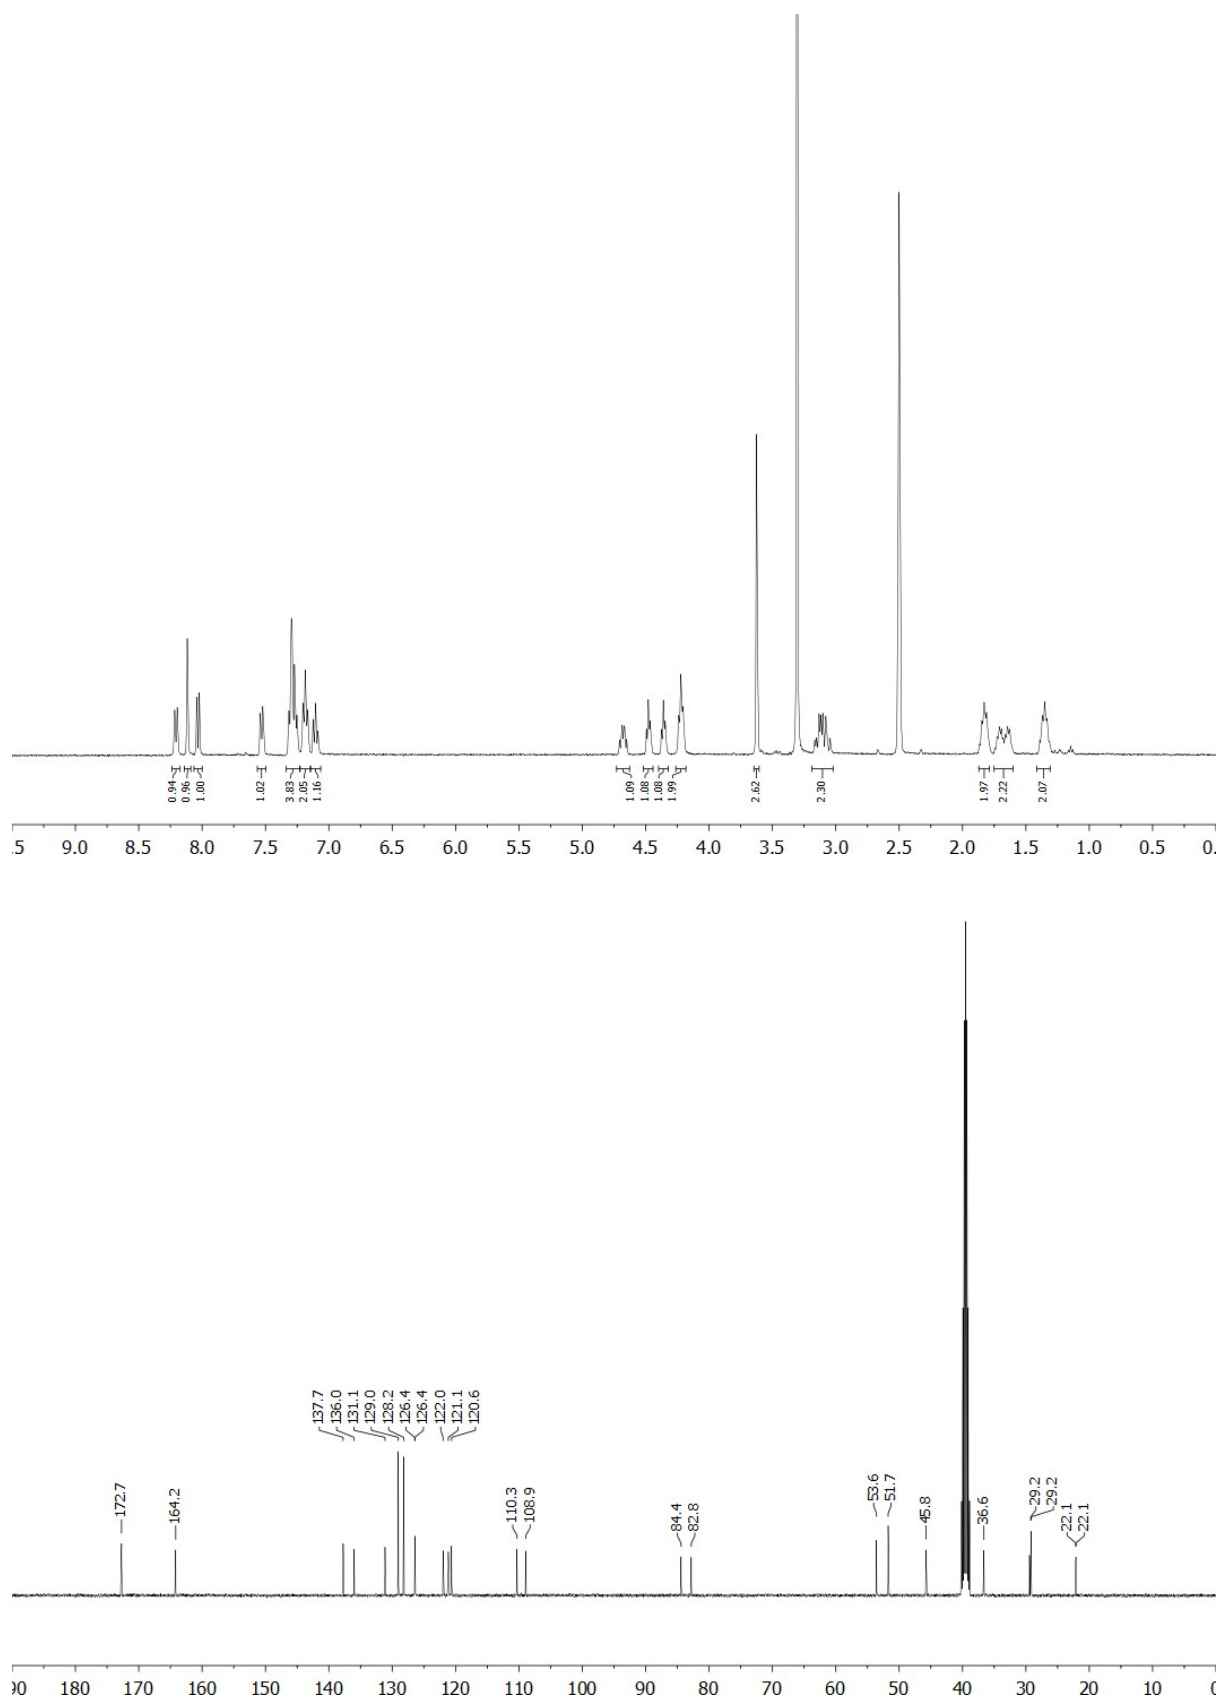

**Figure S17.**  $^1\text{H}$  and  $^{13}\text{C}$  NMR spectra for methyl (1-(5-fluoropentyl)-1*H*-indole-3-carbonyl)-*S*-tyrosinate (*S*-TYR-5F-PICA, **35**).

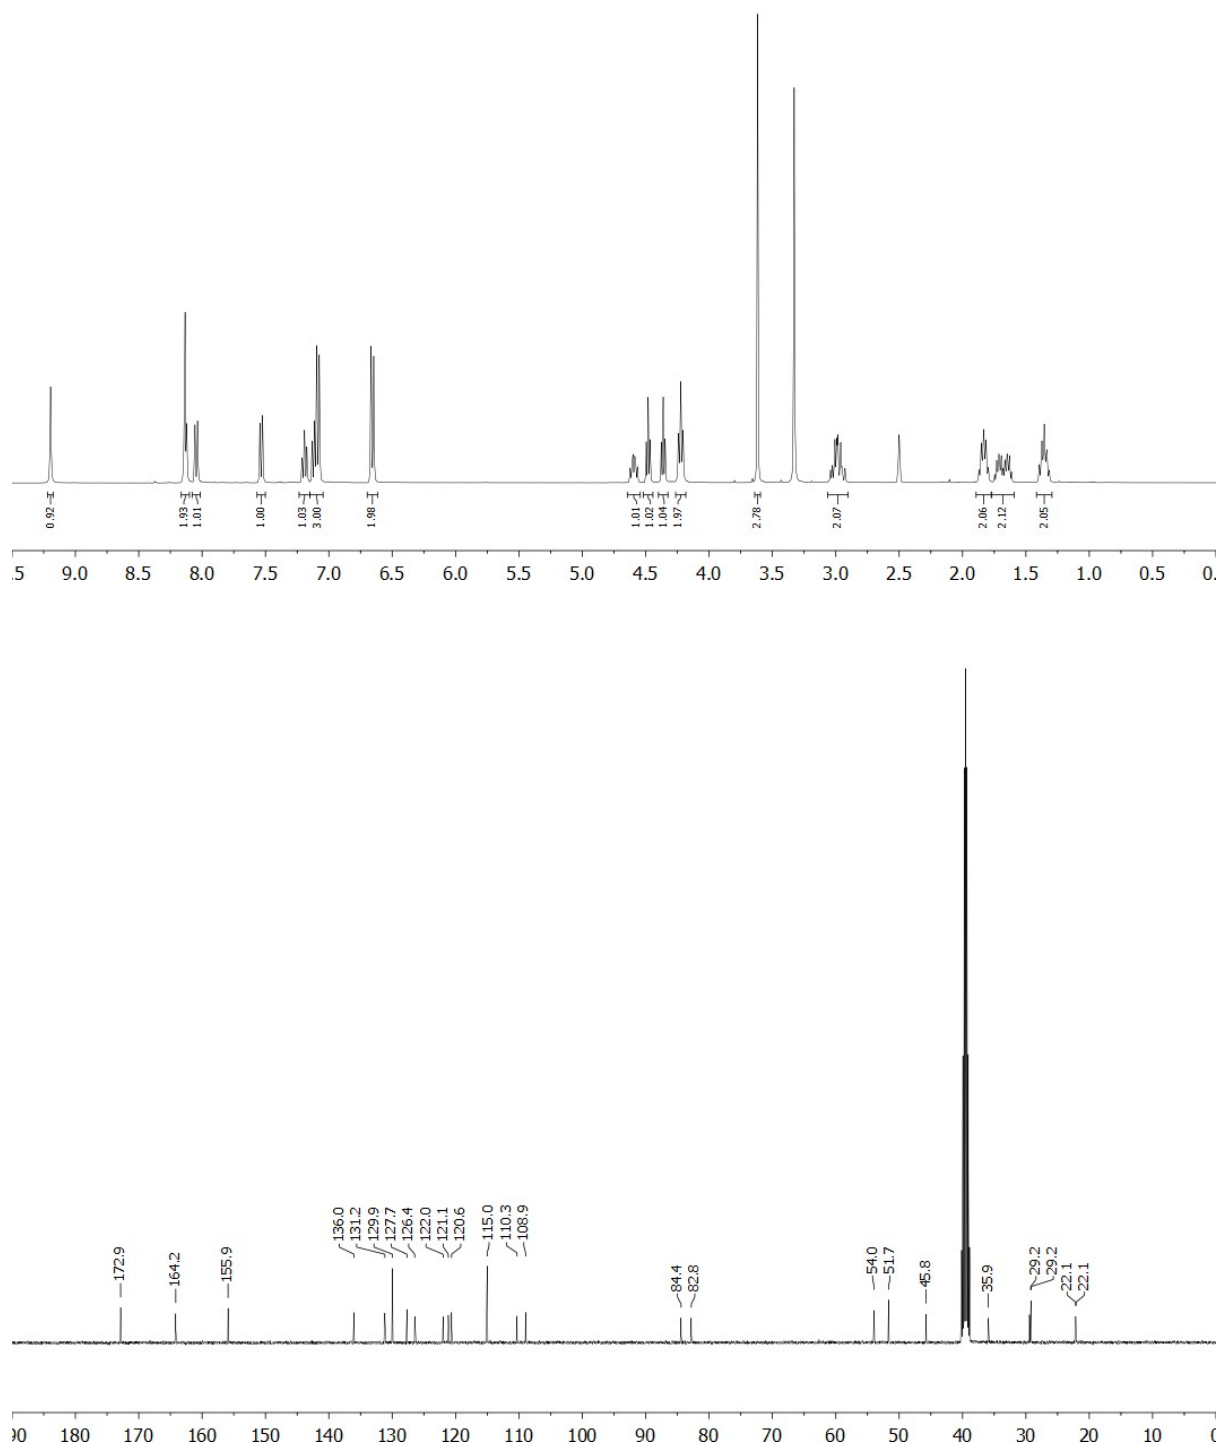

**Figure S18.**  $^1\text{H}$  and  $^{13}\text{C}$  NMR spectra for methyl (1-(5-fluoropentyl)-1*H*-indole-3-carbonyl)-*R*-tyrosinate (*R*-TYR-5F-PICA, **36**).

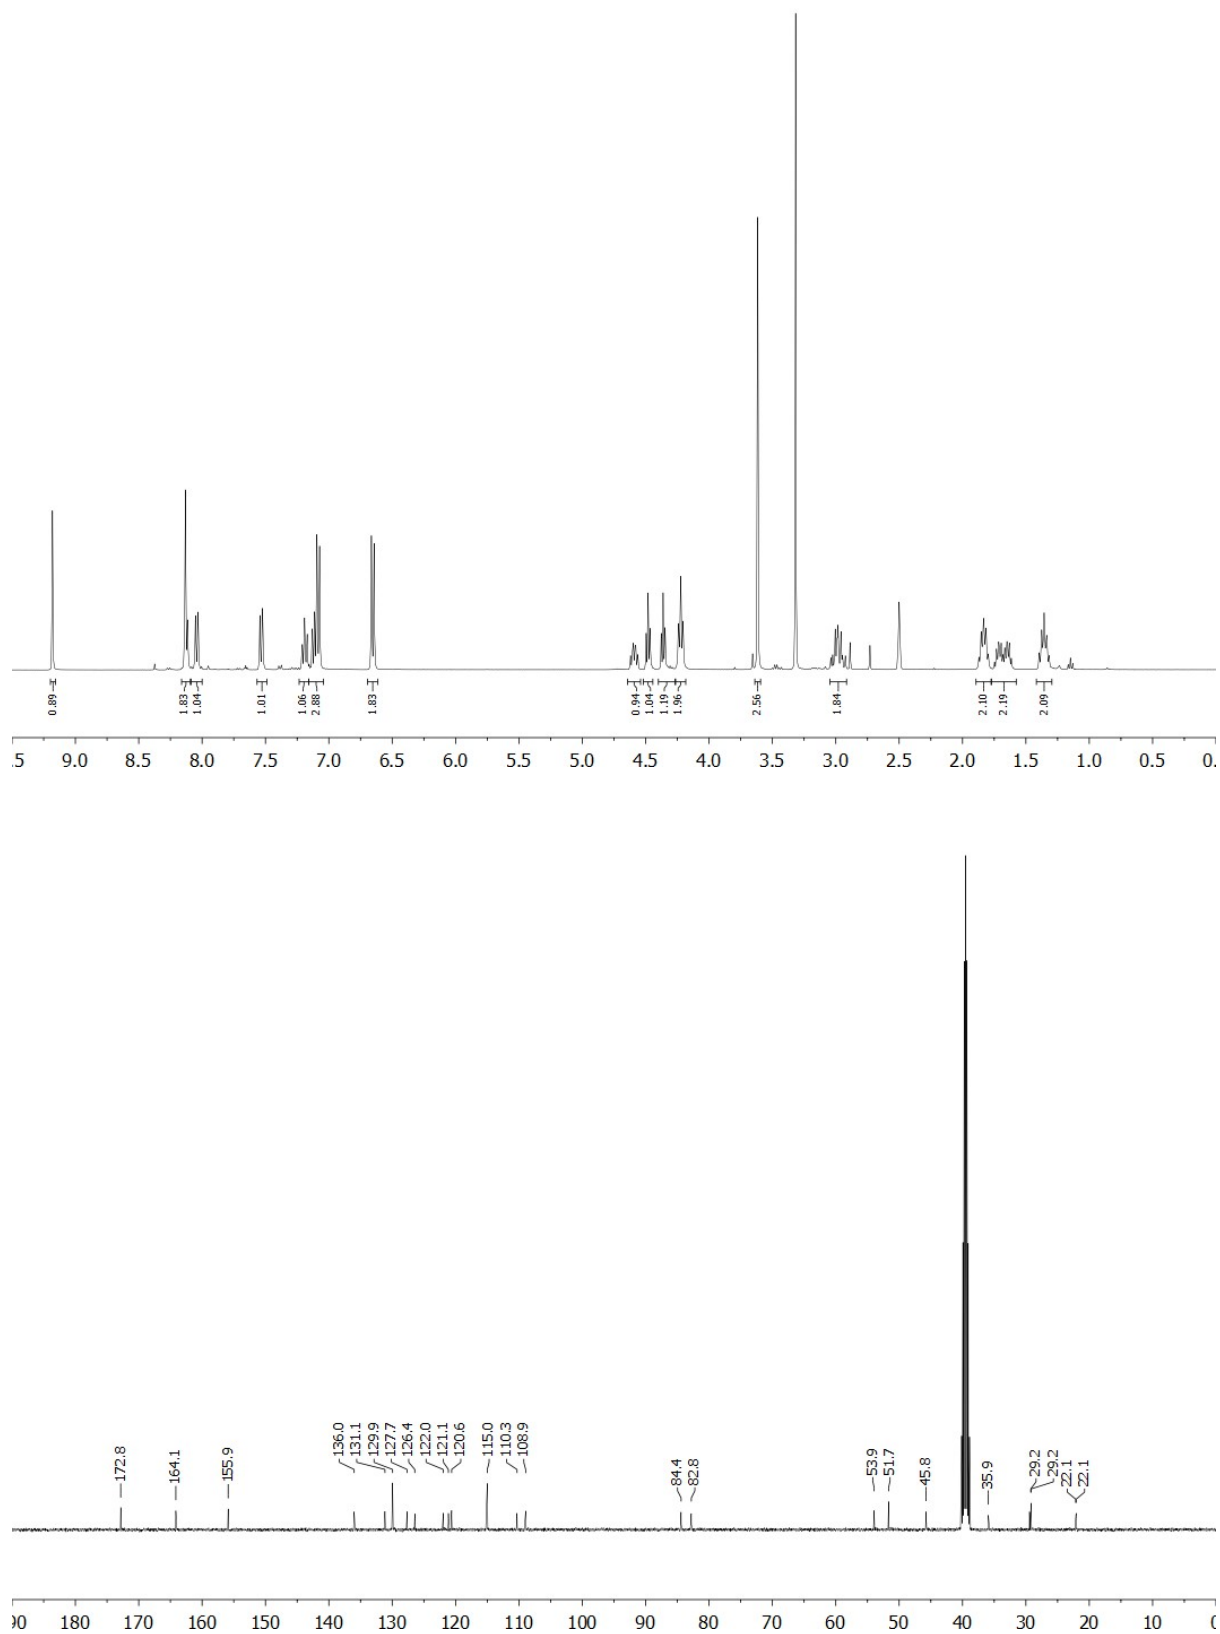

**Figure S19.**  $^1\text{H}$  and  $^{13}\text{C}$  NMR spectra for methyl (1-(5-fluoropentyl)-1*H*-indole-3-carbonyl)-*S*-tryptophanate (*S*-TRP-5F-PICA, **37**).

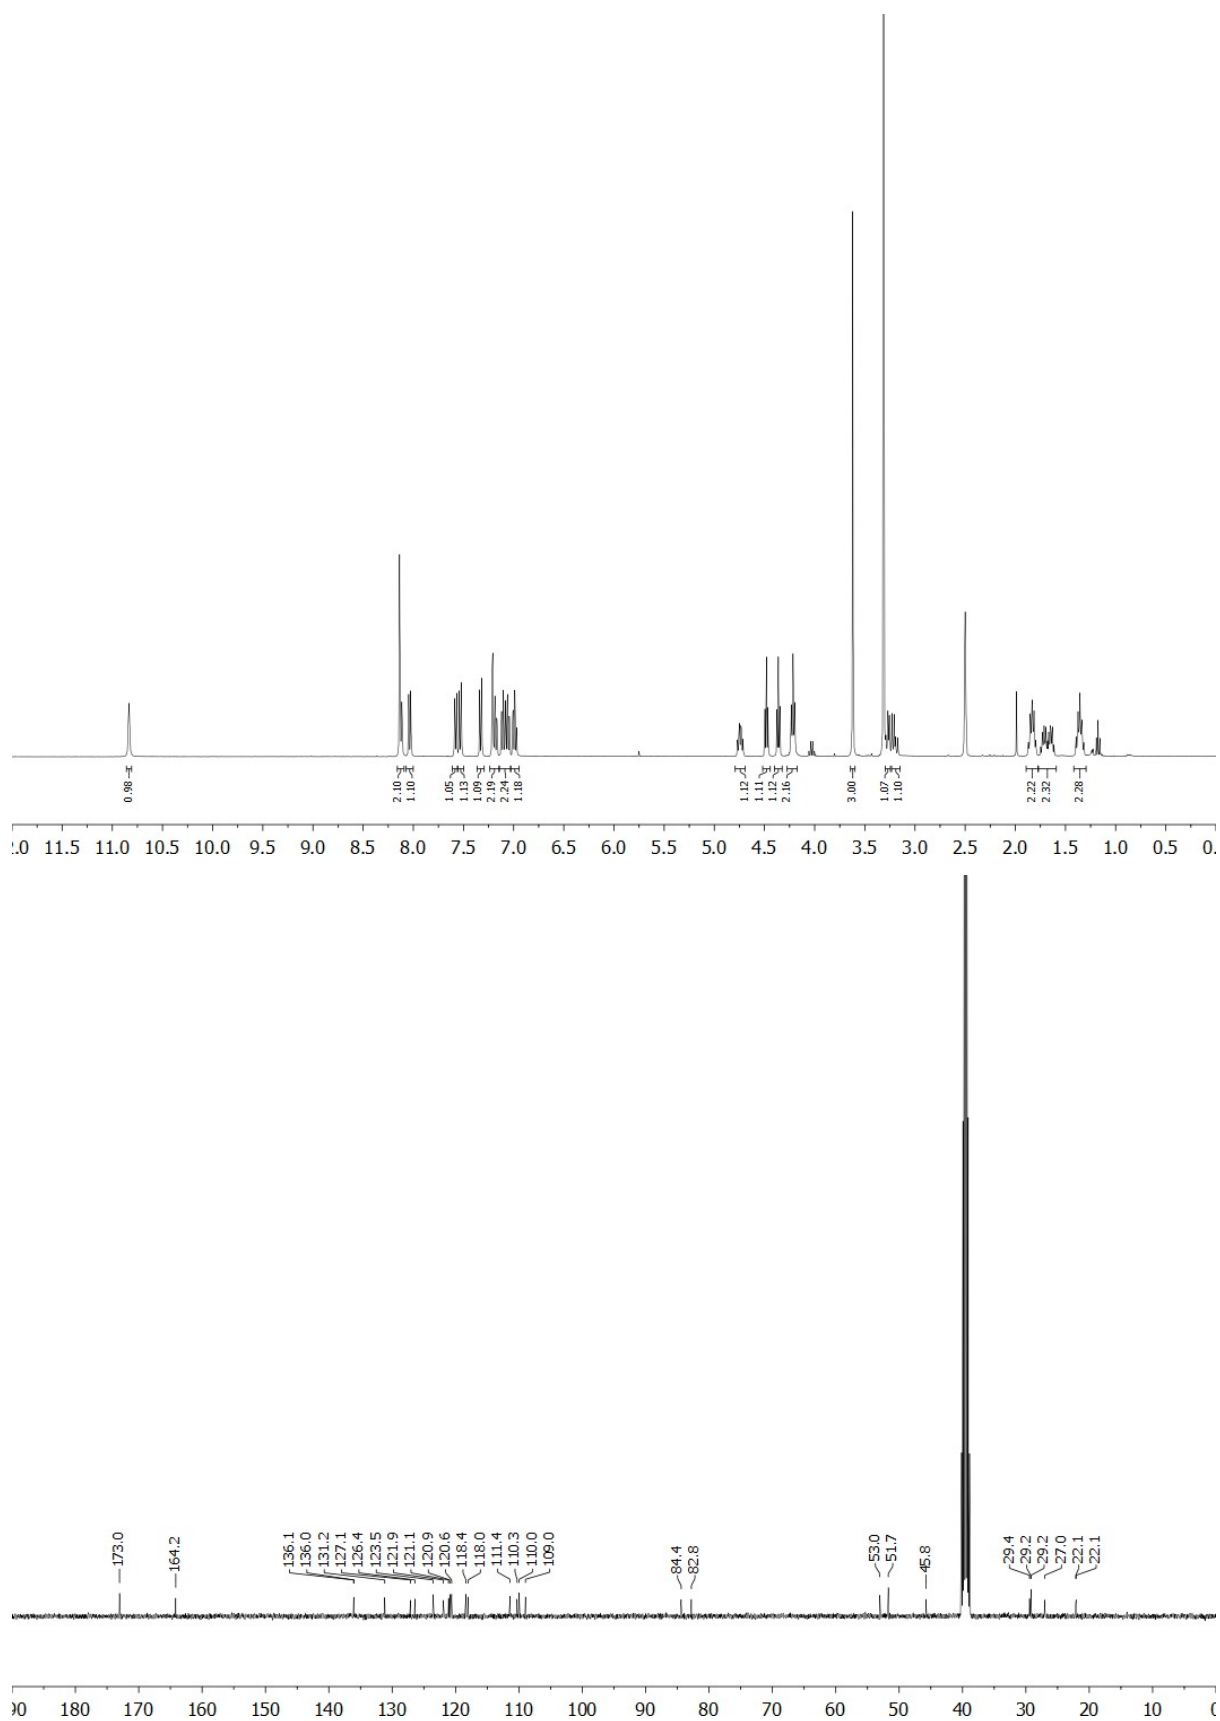

**Figure S20.**  $^1\text{H}$  and  $^{13}\text{C}$  NMR spectra for methyl (1-(5-fluoropentyl)-1*H*-indole-3-carbonyl)-*R*-tryptophanate (*R*-TRP-5F-PICA, **38**).

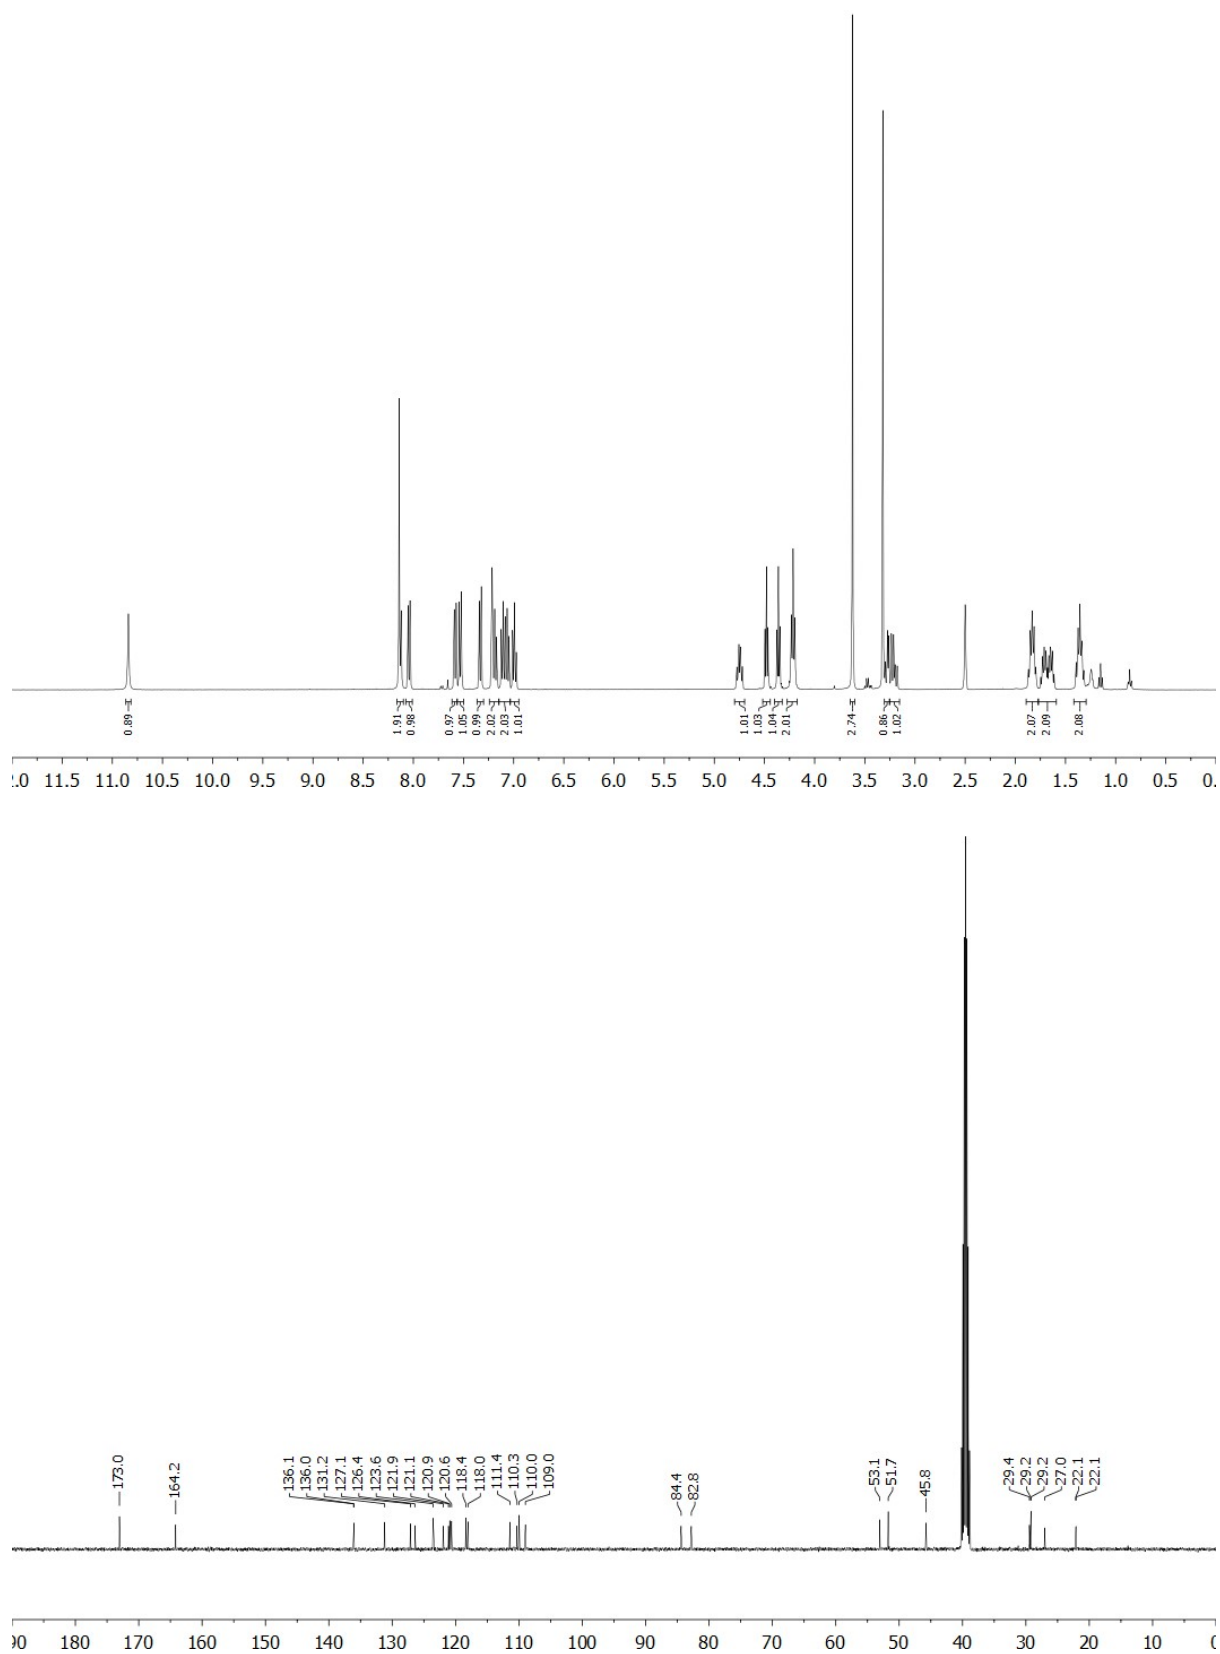

**Figure S21.**  $^1\text{H}$  and  $^{13}\text{C}$  NMR spectra for methyl (1-(5-fluoropentyl)-1*H*-indole-3-carbonyl)-*S*-lysinate (*S*-LYS-5F-PICA **39**).

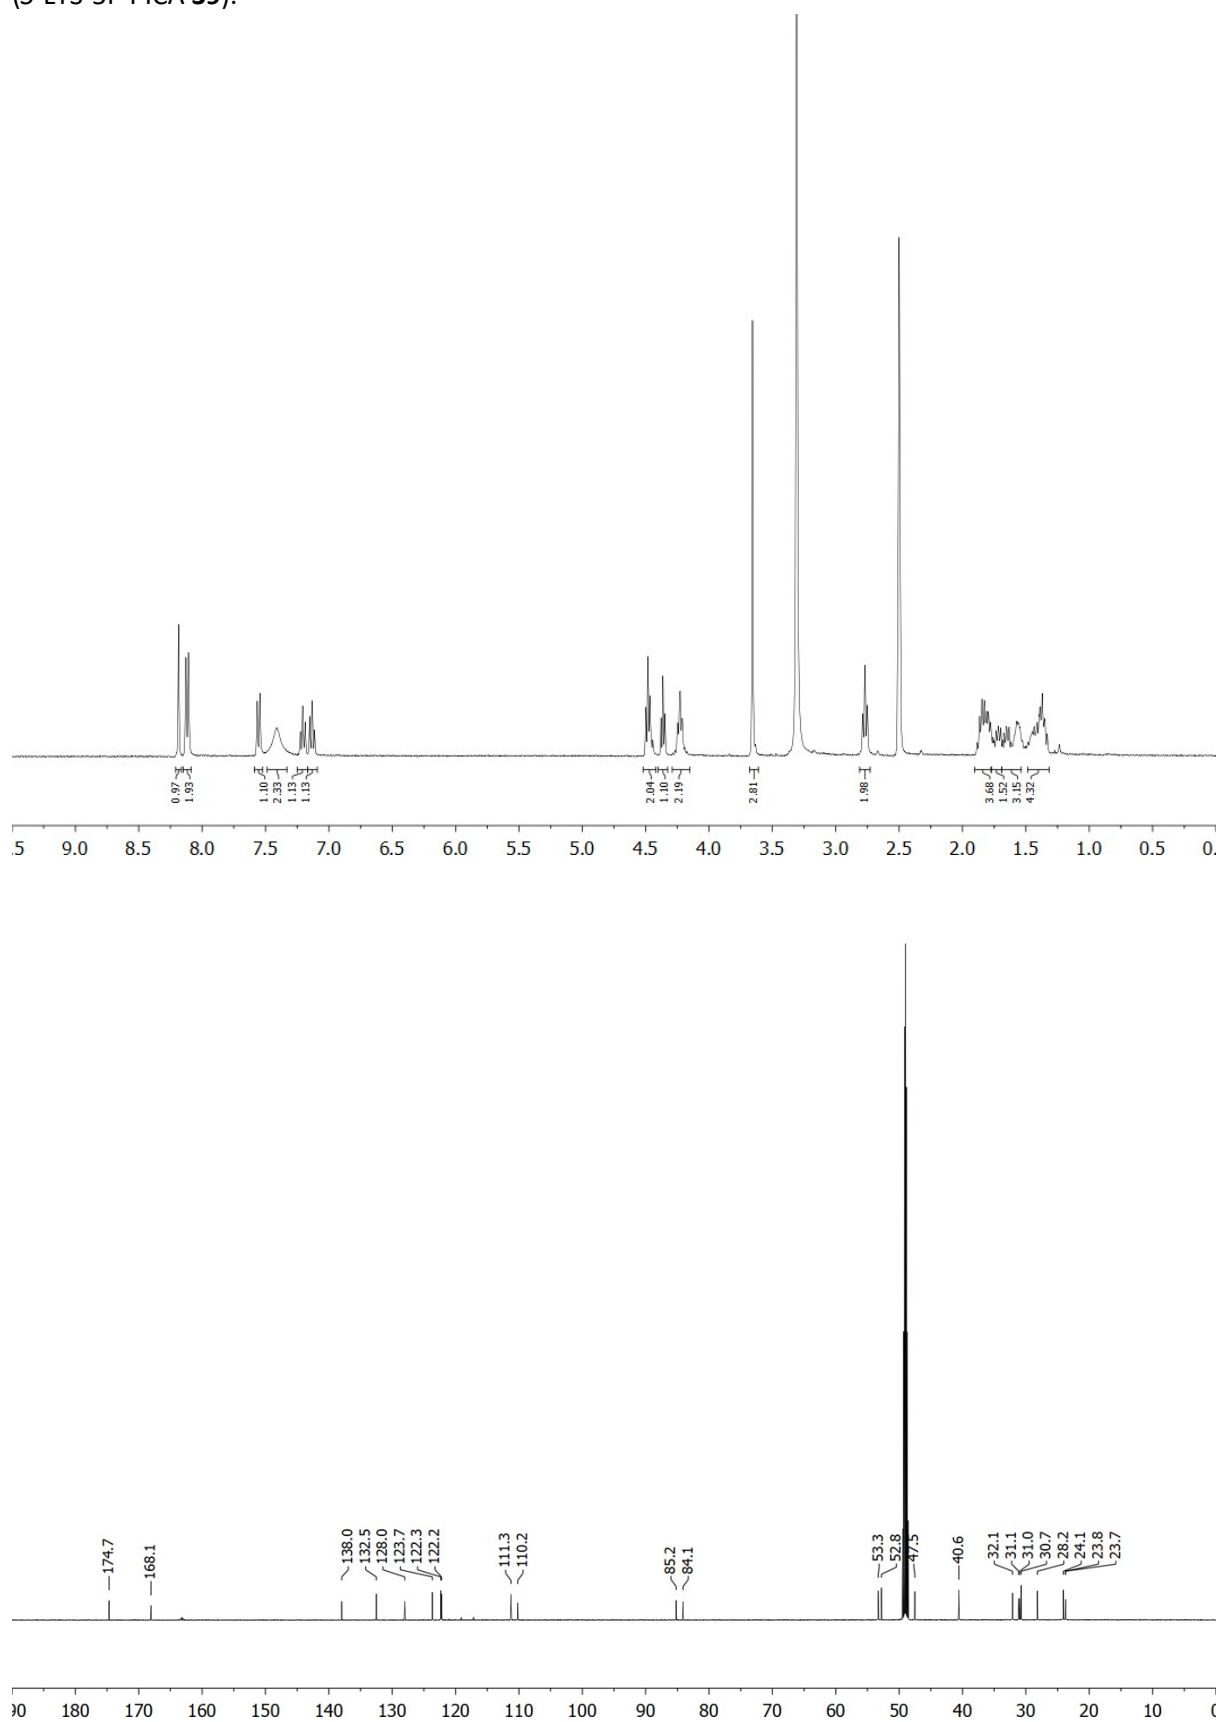

**Figure S22.**  $^1\text{H}$  and  $^{13}\text{C}$  NMR spectra for methyl (1-(5-fluoropentyl)-1*H*-indole-3-carbonyl)-*R*-lysinate (*R*-LYS-5F-PICA, **40**).

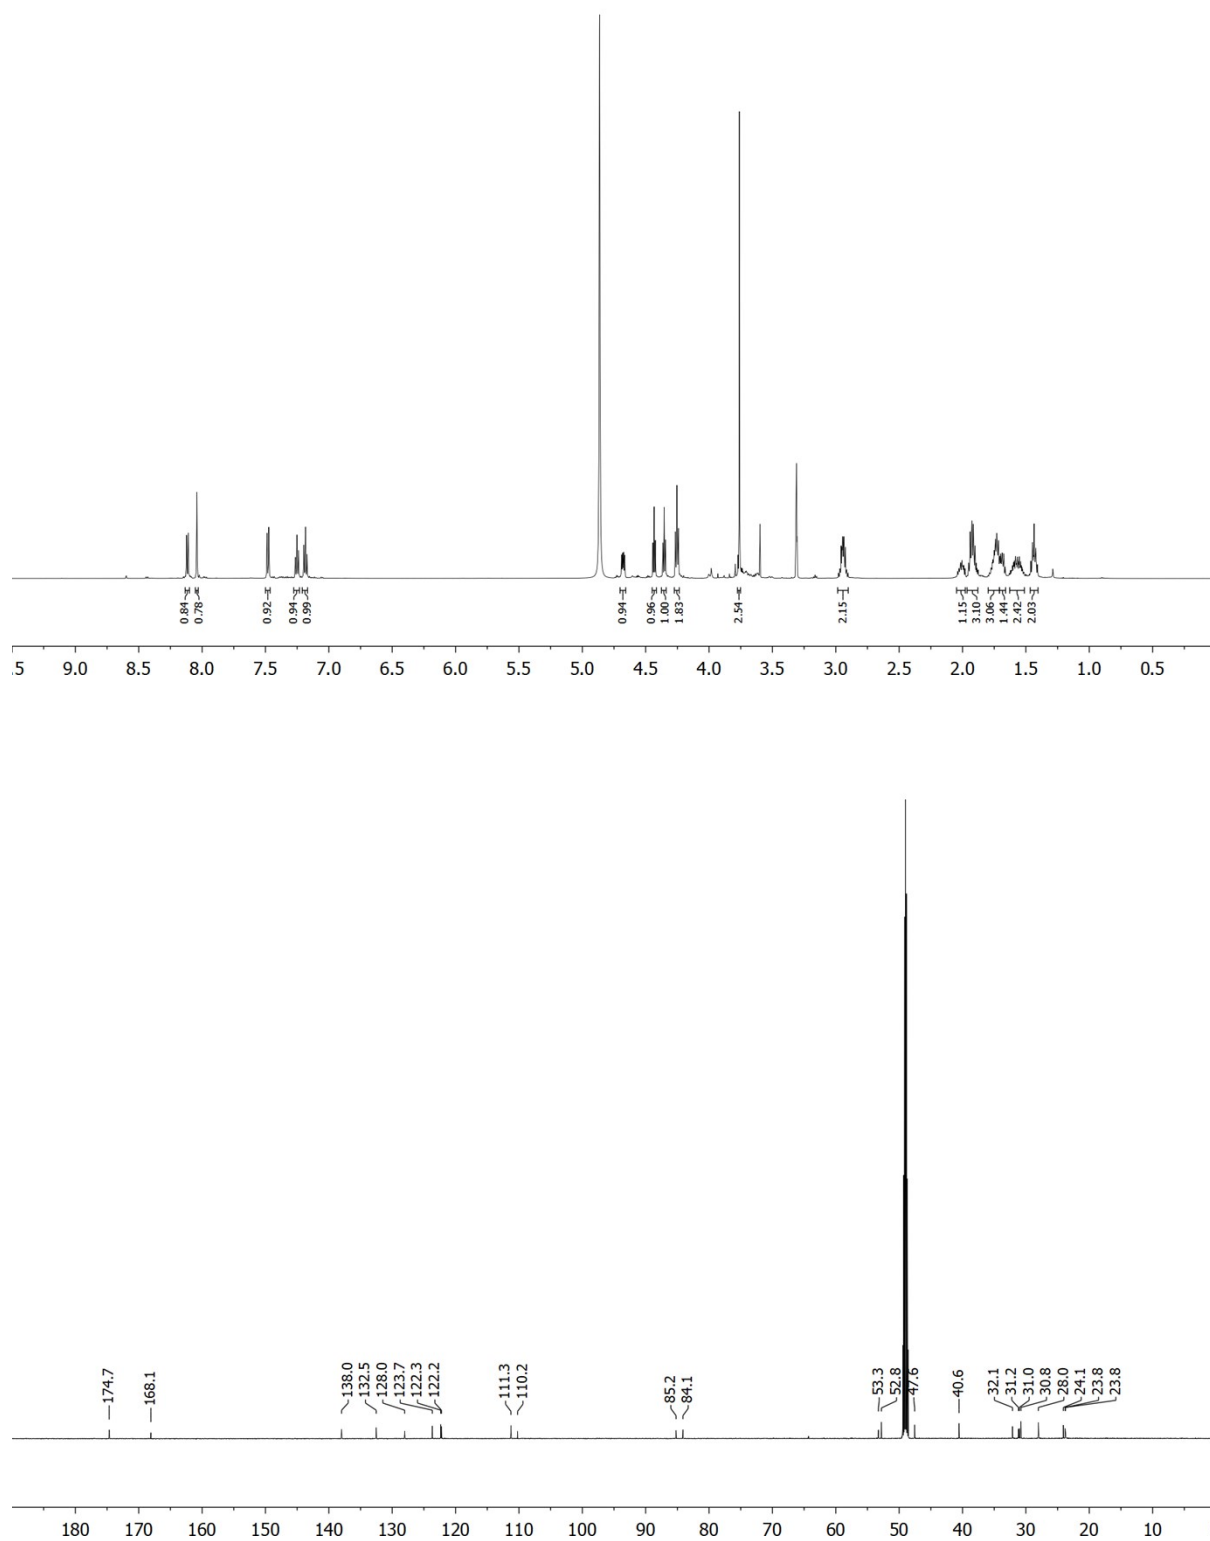

**Figure S23.**  $^1\text{H}$  and  $^{13}\text{C}$  NMR spectra for methyl (1-(5-fluoropentyl)-1*H*-indole-3-carbonyl)-*S*-methioninate (*S*-MET-5F-PICA, **41**).

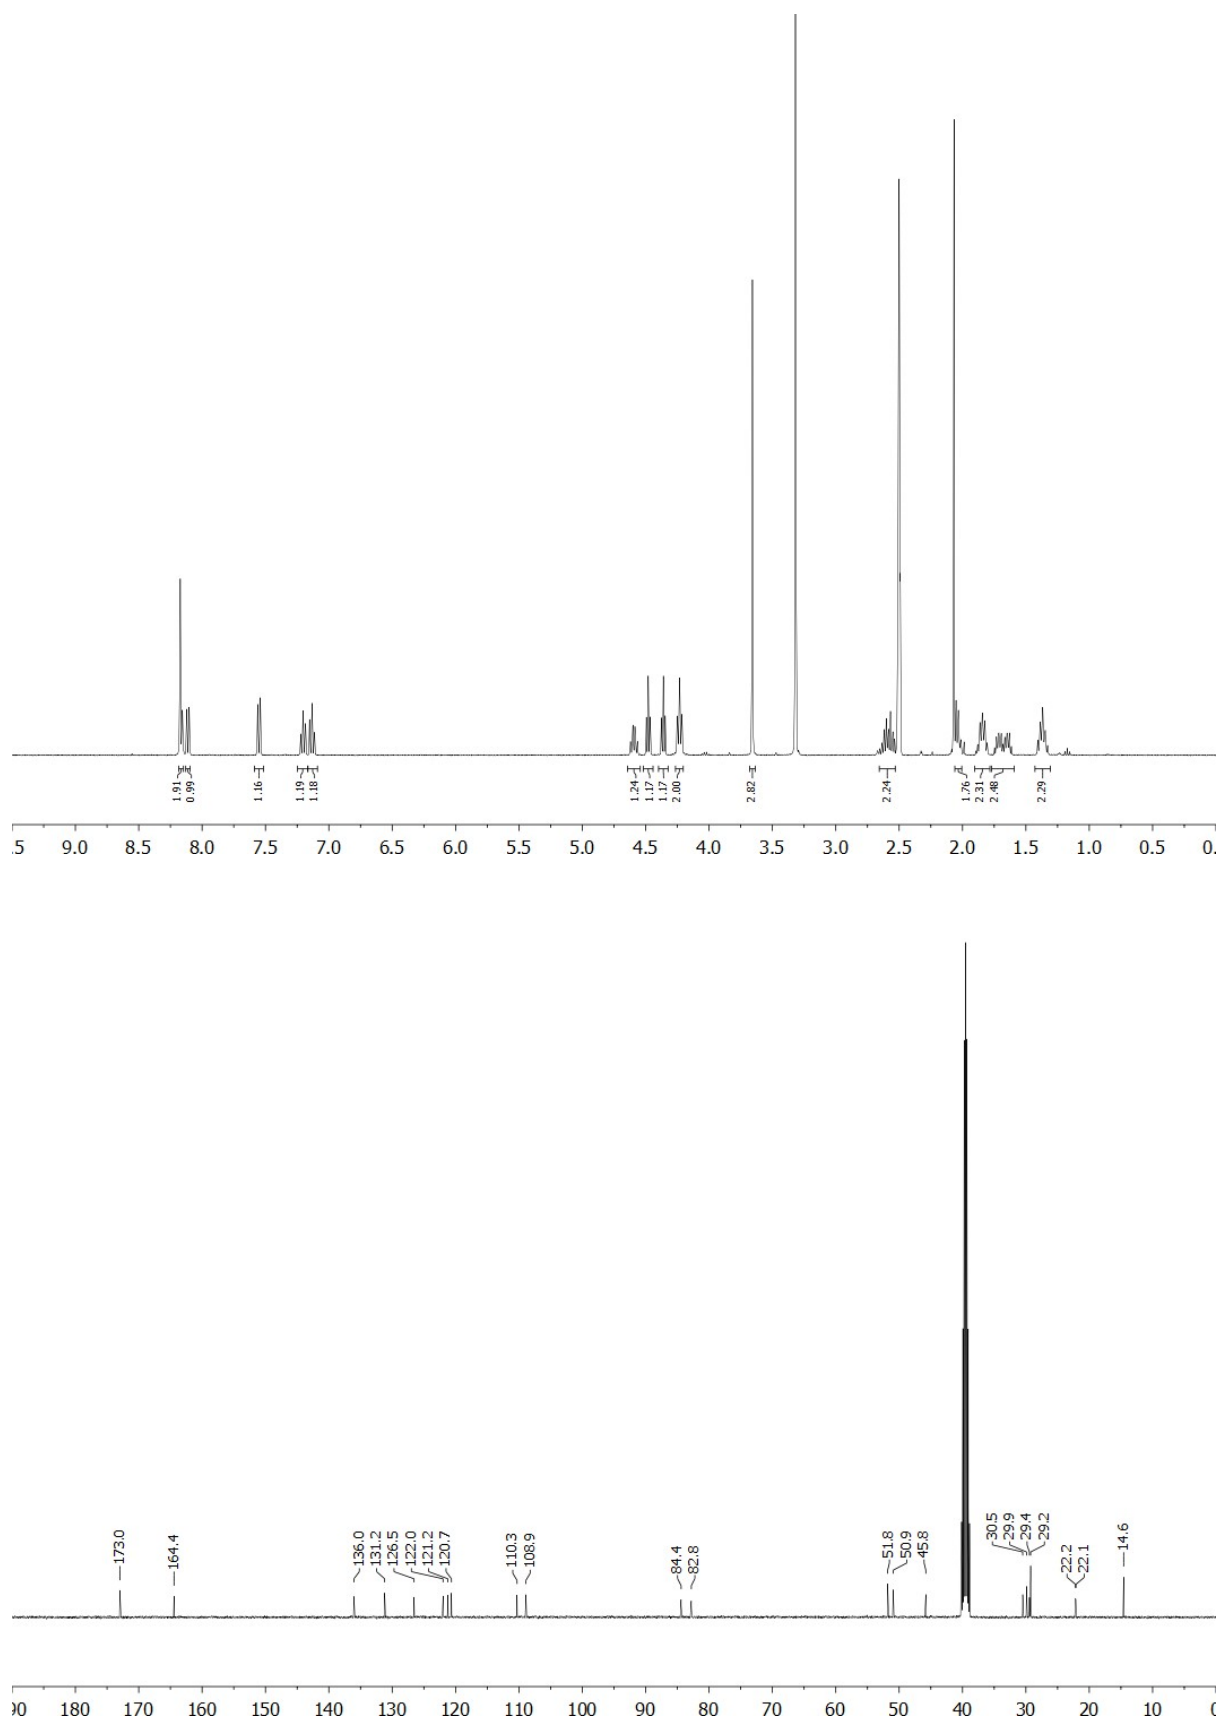



**Figure S24.**  $^1\text{H}$  and  $^{13}\text{C}$  NMR spectra for methyl (1-(5-fluoropentyl)-1*H*-indole-3-carbonyl)-*R*-methioninate (*R*-MET-5F-PICA, **42**).

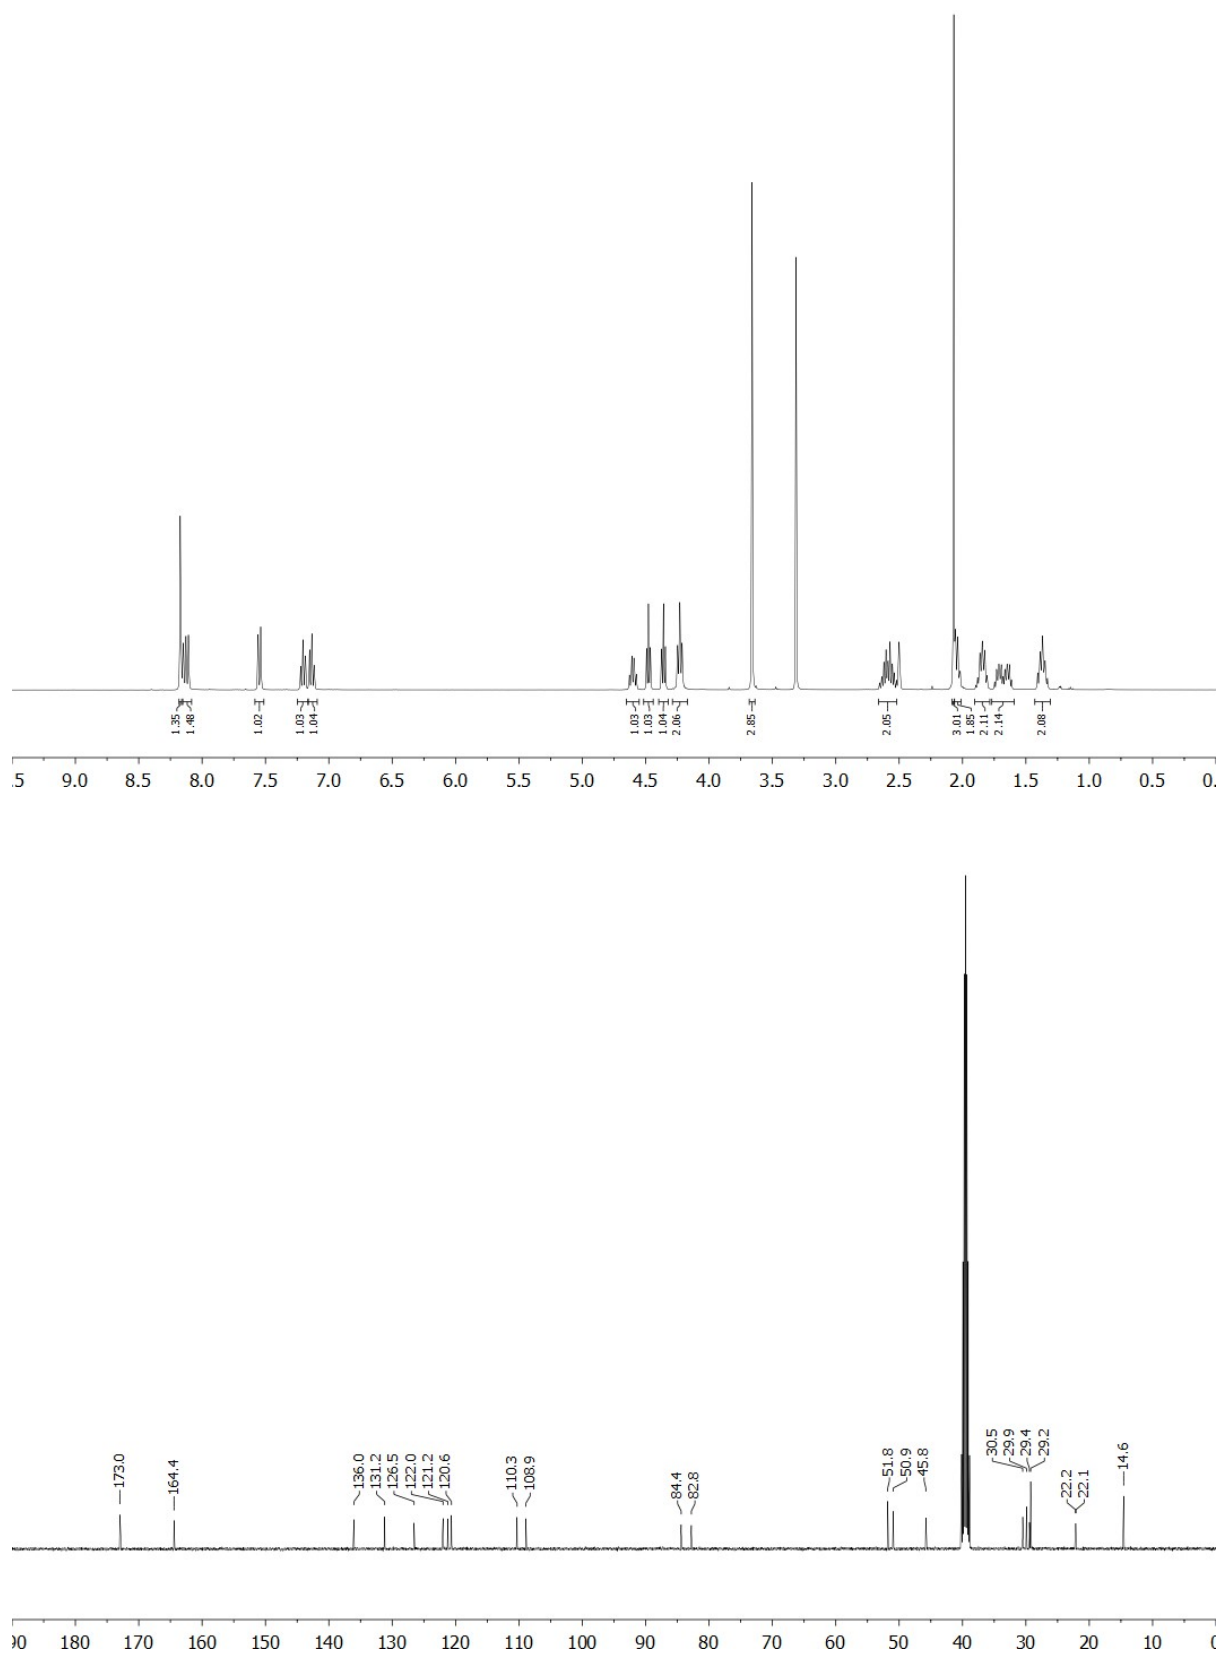

**Figure S25.**  $^1\text{H}$  and  $^{13}\text{C}$  NMR spectra for methyl (*S*)-5-amino-2-(1-(5-fluoropentyl)-1*H*-indole-3-carboxamido)-5-oxopentanoate (*S*-GLN-5F-PICA, **43**).

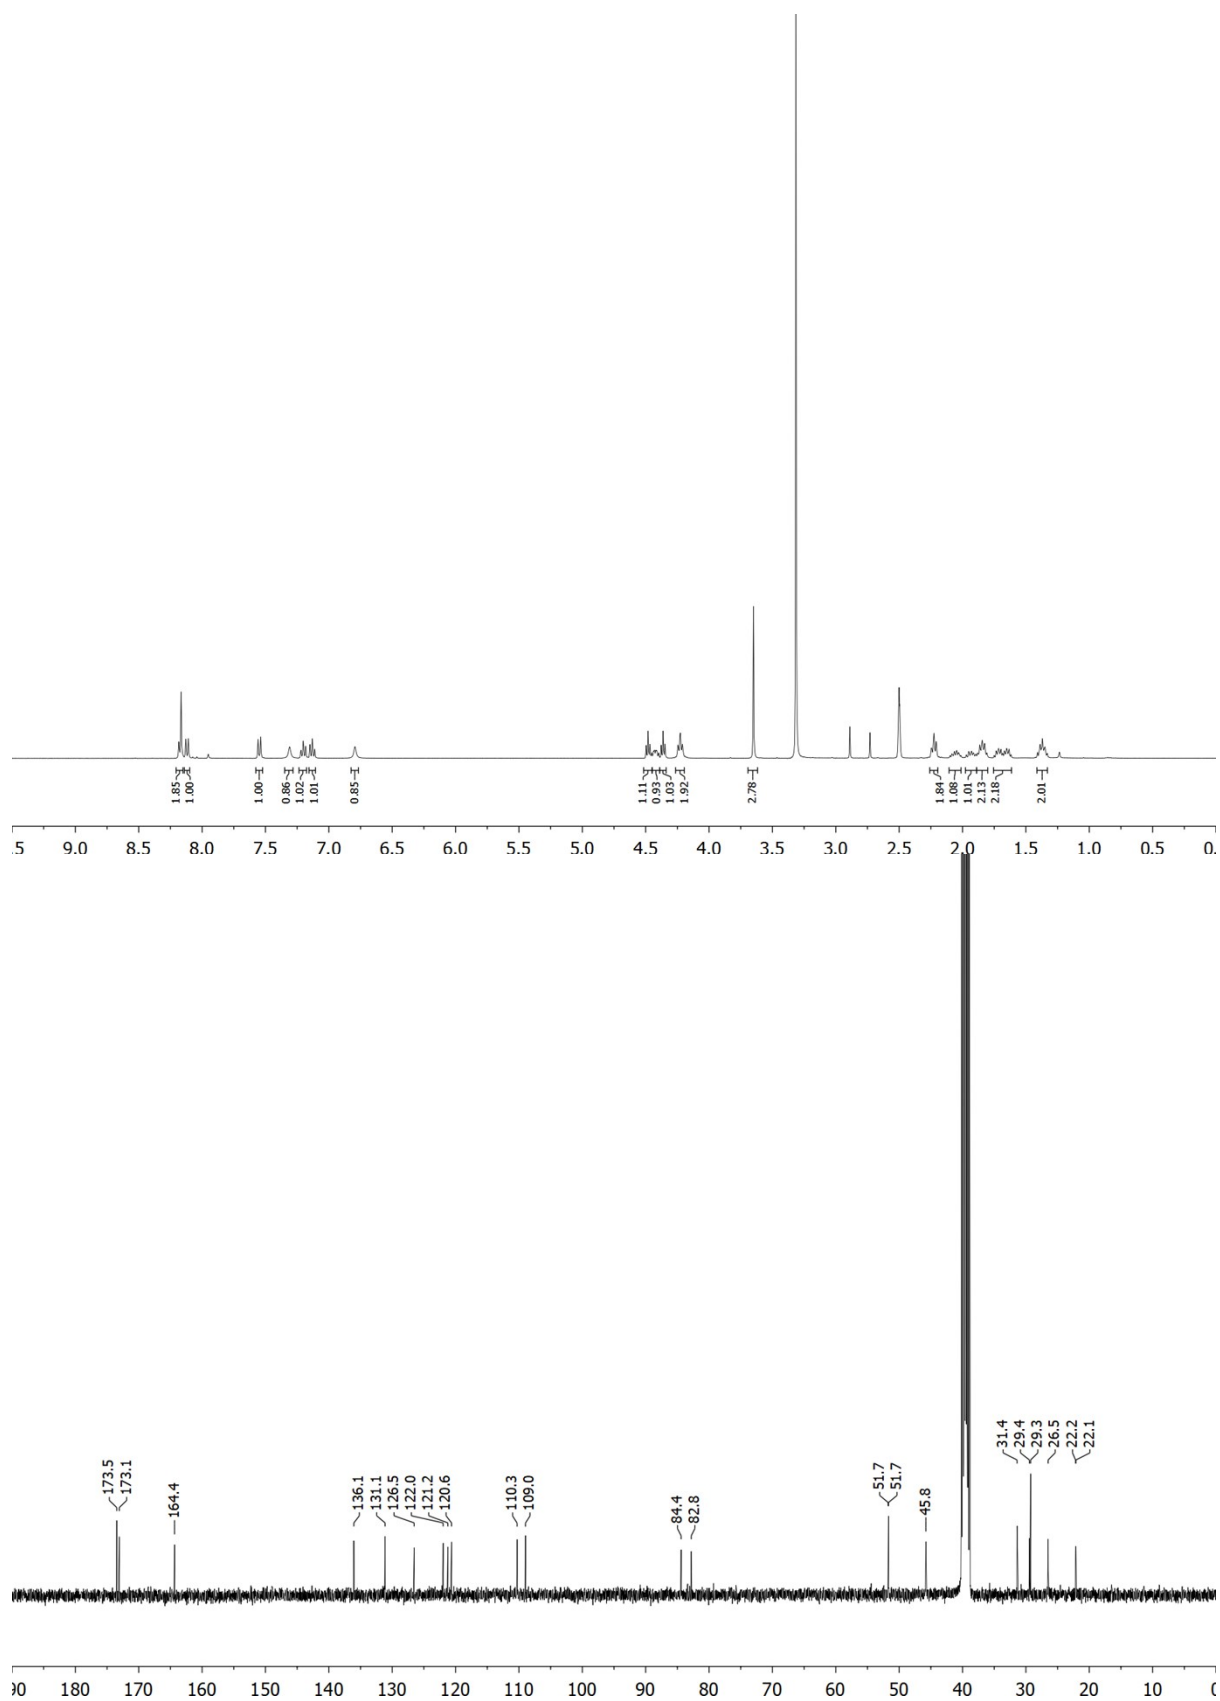

**Figure S26.**  $^1\text{H}$  and  $^{13}\text{C}$  NMR spectra for methyl (*R*)-5-amino-2-(1-(5-fluoropentyl)-1*H*-indole-3-carboxamido)-5-oxopentanoate (*R*-GLN-5F-PICA, **44**).

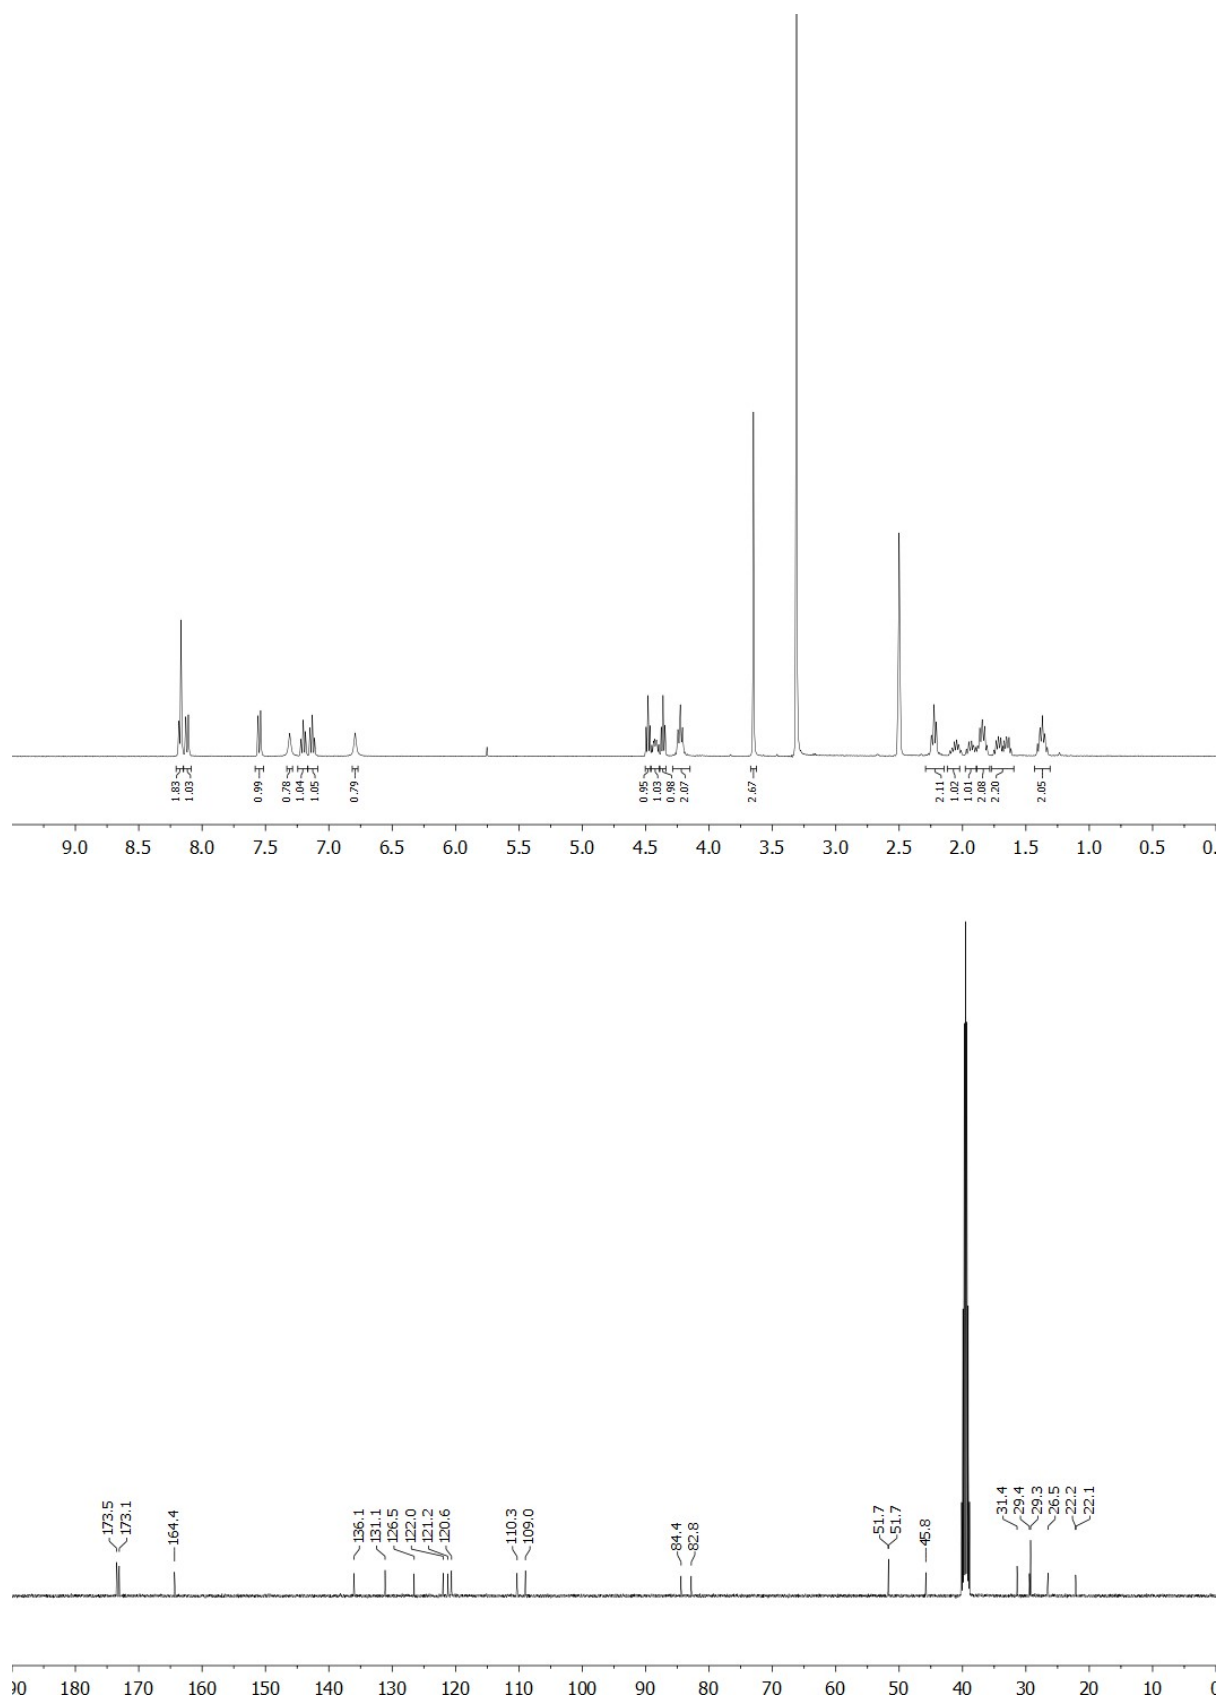

**Figure S27.** LCMS spectra for methyl (1-(5-fluoropentyl)-1*H*-indole-3-carbonyl)glycinate (GLY-5F-PICA, 16).

### UV Chromatogram

mAU

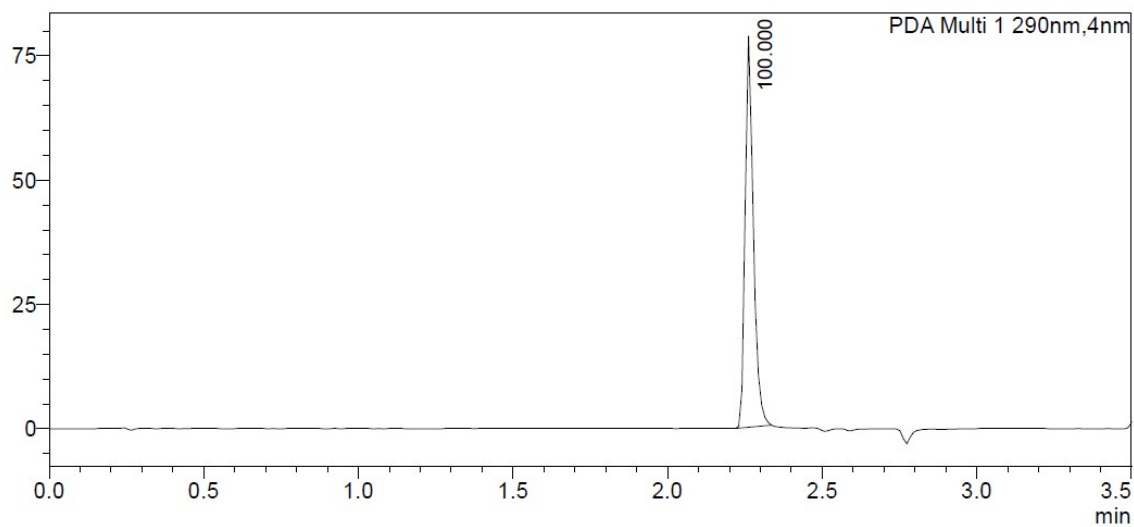

### MS Spectra

Line#:1 R. Time:2.258(Scan#:431)  
MassPeaks:7 Mode: Positive  
Spectrum Mode:Single 2.258(431) Base Peak:321.1(16593862)  
BG Mode:None Segment 1 - Event 1

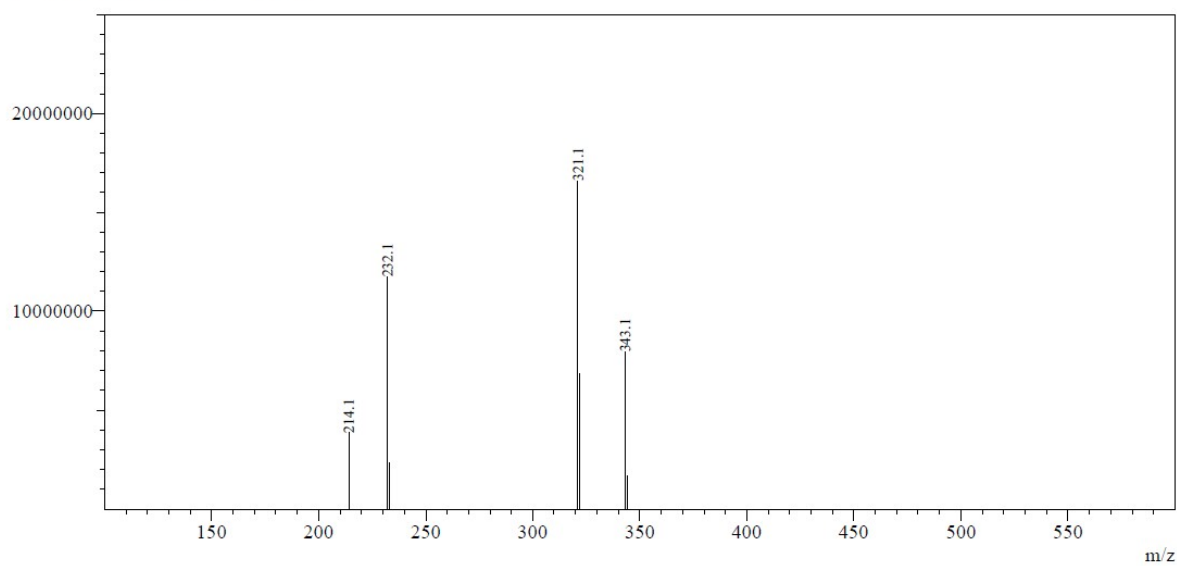

**Figure S28.** LCMS spectra for methyl (1-(5-fluoropentyl)-1*H*-indole-3-carbonyl)-*S*-alaninate (*S*-ALA-5F-PICA, **17**).

### UV Chromatogram

mAU

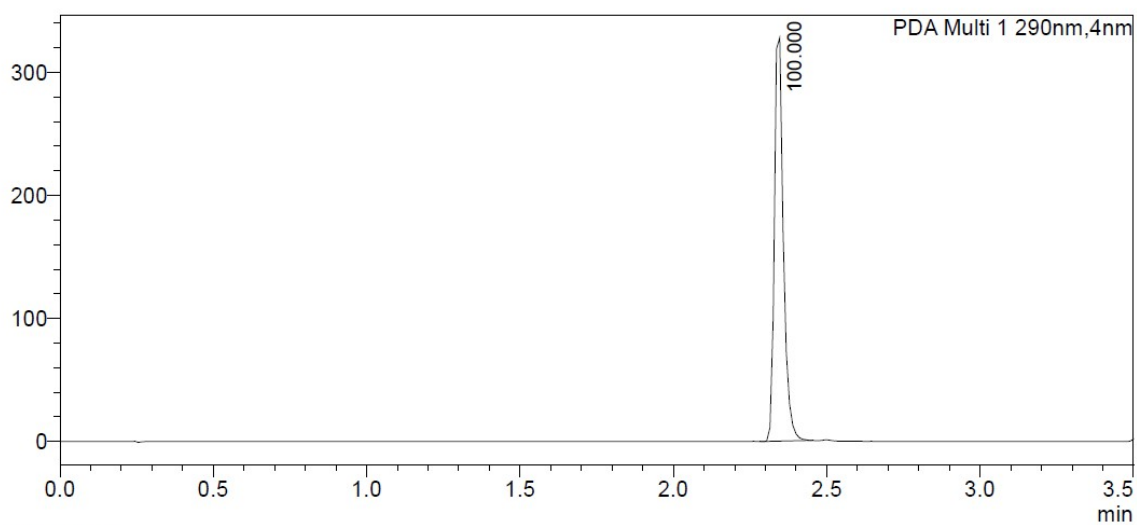

### MS Spectra

Line#:1 R.Time:----(Scan#:----)  
MassPeaks:10 Mode: Positive  
Spectrum Mode:Averaged 2.342-2.363(447-451) Base Peak:232.0(16038082)  
BG Mode:Calc Segment 1 - Event 1

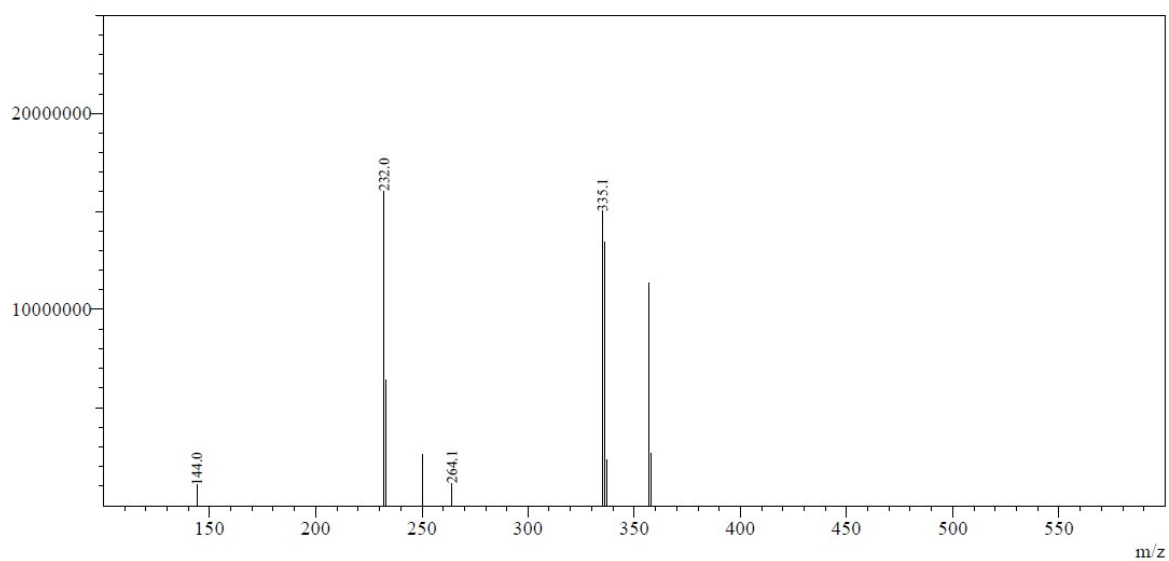

**Figure S29.** LCMS spectra for methyl (1-(5-fluoropentyl)-1*H*-indole-3-carbonyl)-*R*-alaninate (*R*-ALA-5F-PICA, **18**).

### UV Chromatogram

mAU

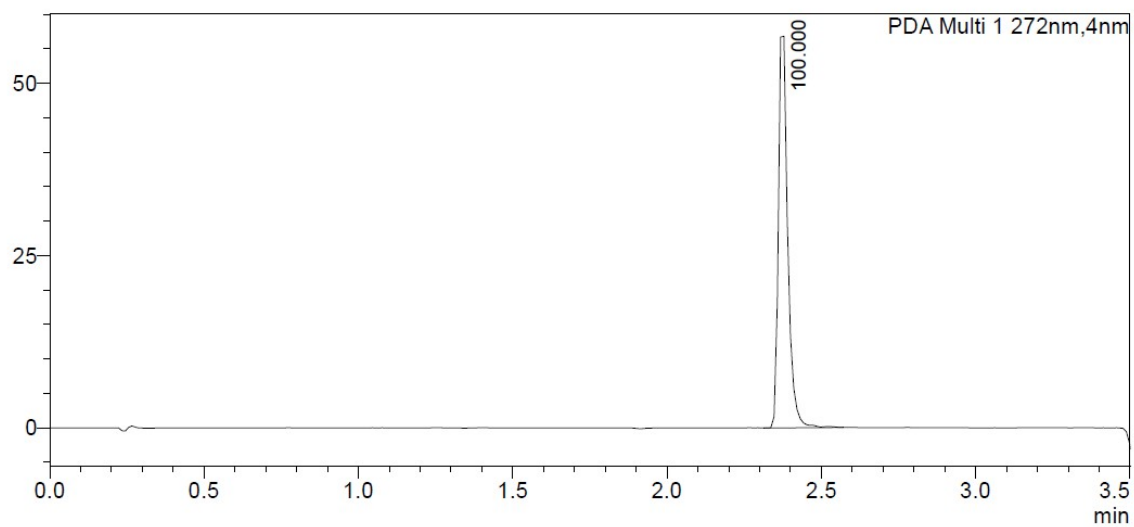

### MS Spectra

Line#:1 R.Time:---(Scan#:---)  
MassPeaks:6 Mode: Positive  
Spectrum Mode:Averaged 2.321-2.478(443-473) Base Peak:335.1(9189262)  
BG Mode:Averaged 1.418-1.691(271-323) Segment 1 - Event 1

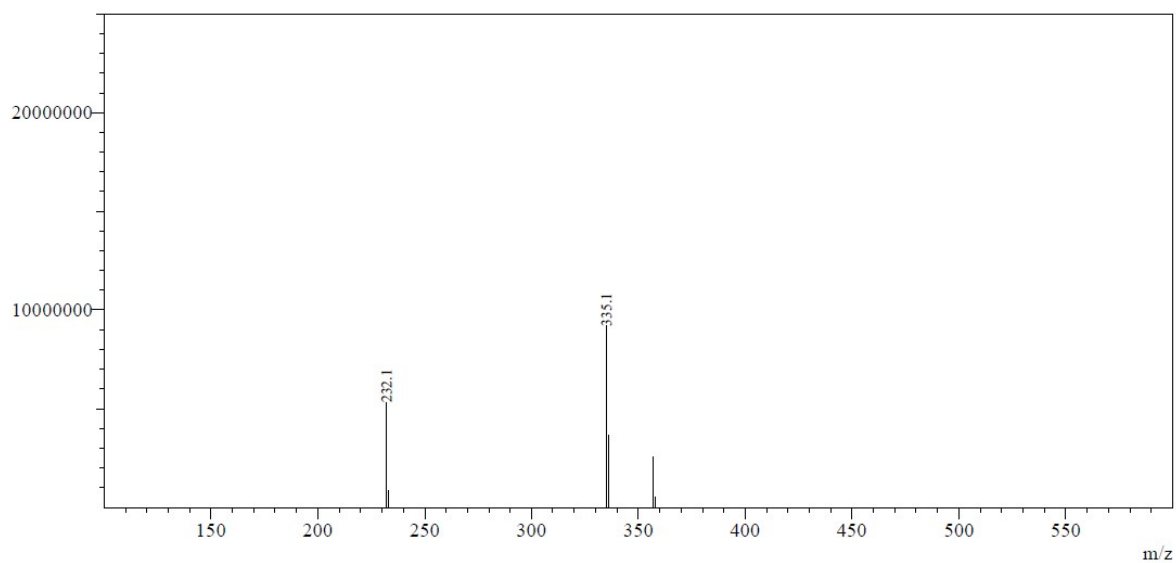

**Figure S30.** LCMS spectra for methyl (1-(5-fluoropentyl)-1*H*-indole-3-carbonyl)-*R*-valinate (*R*-MMB-5F-PICA, **20**).

### UV Chromatogram

mAU

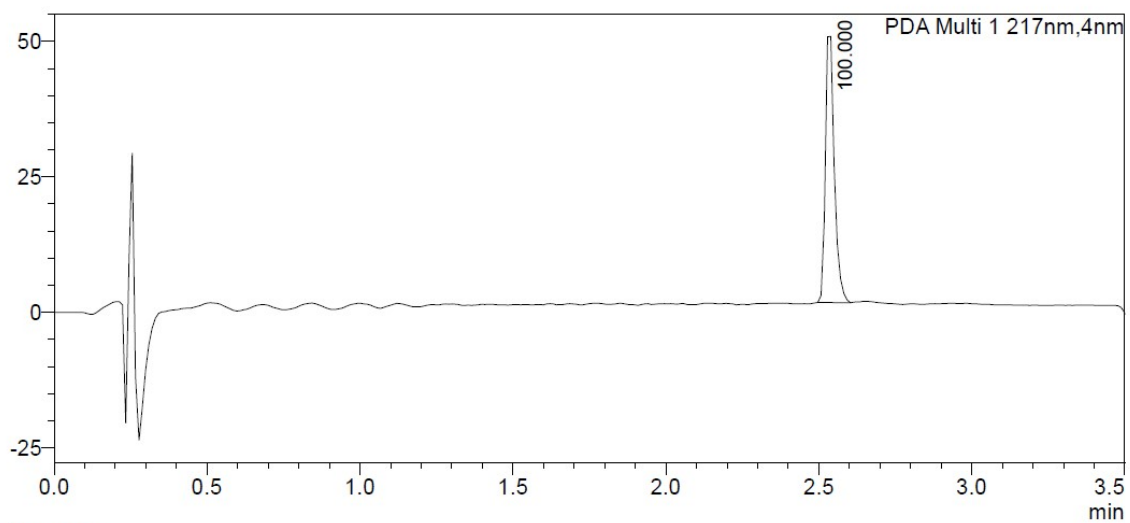

### MS Spectra

Line#:1 R.Time:----(Scan#:----)  
MassPeaks:5 Mode: Positive  
Spectrum Mode:Averaged 2.531-2.552(483-487) Base Peak:385.2(12331779)  
BG Mode:Averaged 0.042-4.473(9-853) Segment 1 - Event 1

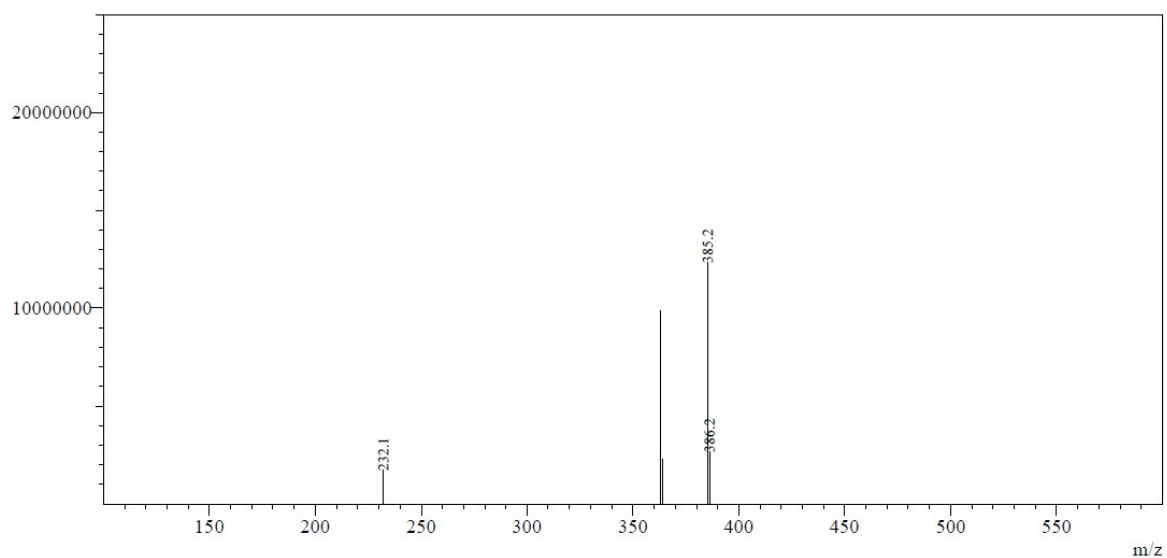

**Figure S31.** LCMS spectra for methyl (1-(5-fluoropentyl)-1*H*-indole-3-carbonyl)-*S*-serinate (*S*-SER-5F-PICA, **21**).

### UV Chromatogram

mAU

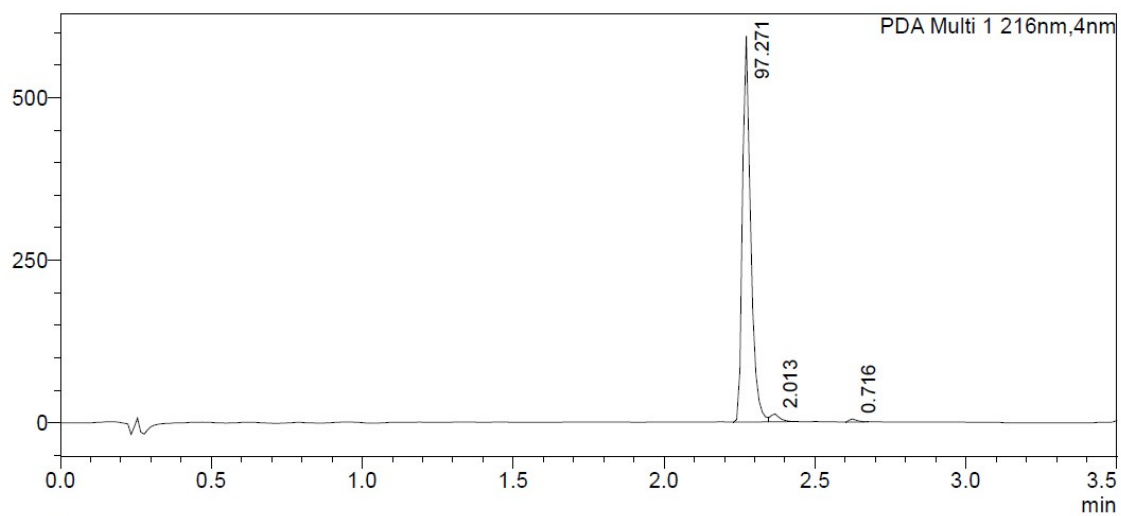

### MS Spectra

Line#:1 R.Time:---(Scan#:---)  
MassPeaks:8 Mode: Positive  
Spectrum Mode:Averaged 2.258-2.300(431-439) Base Peak:373.1(15911108)  
BG Mode:Averaged 0.084-4.410(17-841) Segment 1 - Event 1

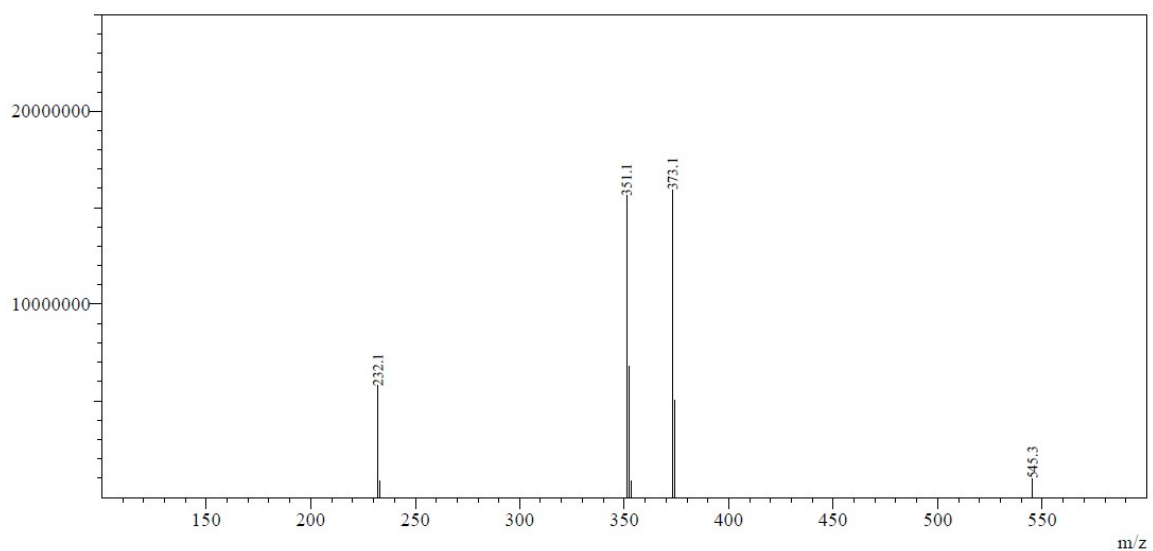



**Figure S32.** LCMS spectra for methyl (1-(5-fluoropentyl)-1*H*-indole-3-carbonyl)-*R*-serinate (*R*-SER-5F-PICA, **22**).

### UV Chromatogram

mAU

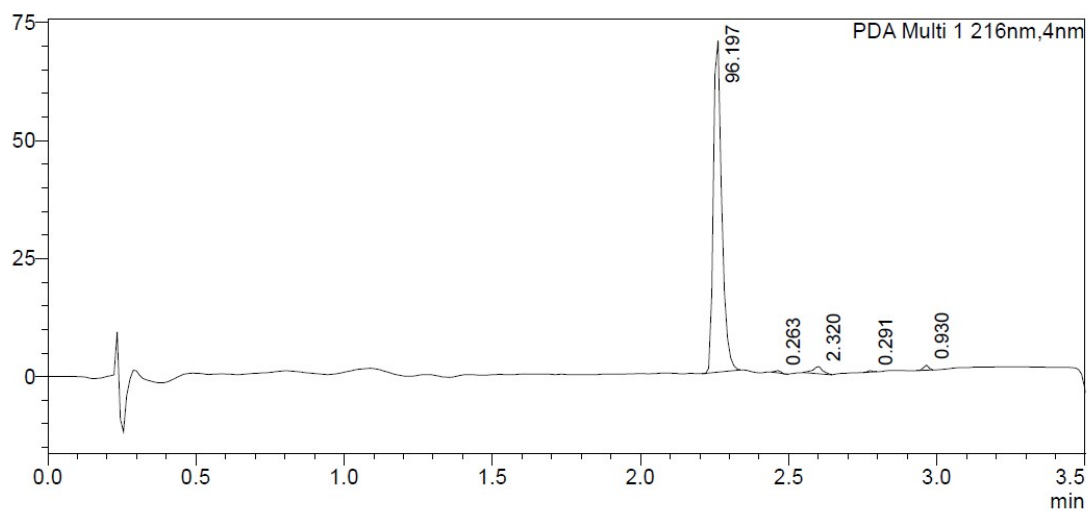

### MS Spectra

Line#:1 R.Time:----(Scan#:----)  
MassPeaks:5 Mode: Positive  
Spectrum Mode:Averaged 2.258-2.300(431-439) Base Peak:373.1(7801970)  
BG Mode:Averaged 0.063-4.379(13-835) Segment 1 - Event 1

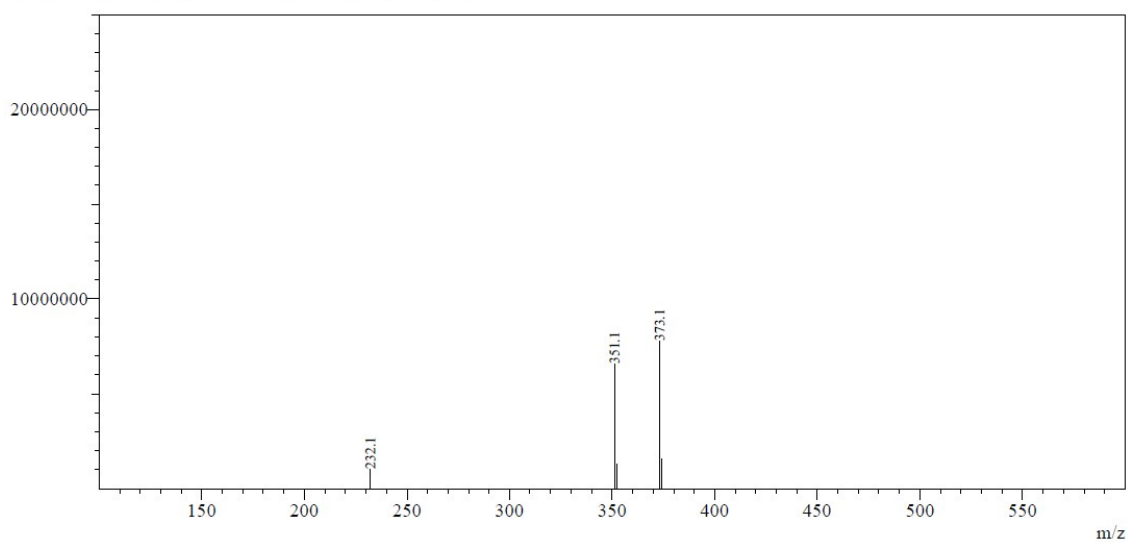

**Figure S33.** LCMS spectra for methyl (1-(5-fluoropentyl)-1*H*-indole-3-carbonyl)-2*S*,3*R*-threoninate (2*S*,3*R*-THR-5F-PICA, **23**).

### UV Chromatogram

mAU

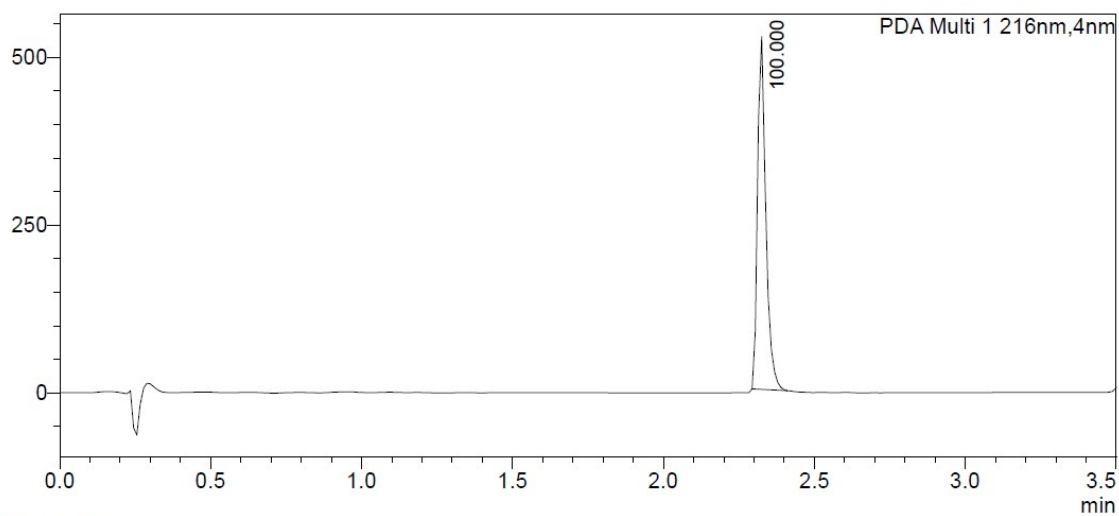

### MS Spectra

Line#:1 R.Time:----(Scan#:----)  
MassPeaks:7 Mode: Positive  
Spectrum Mode:Averaged 2.321-2.363(443-451) Base Peak:387.1(17479359)  
BG Mode:Averaged 0.021-4.410(5-841) Segment 1 - Event 1

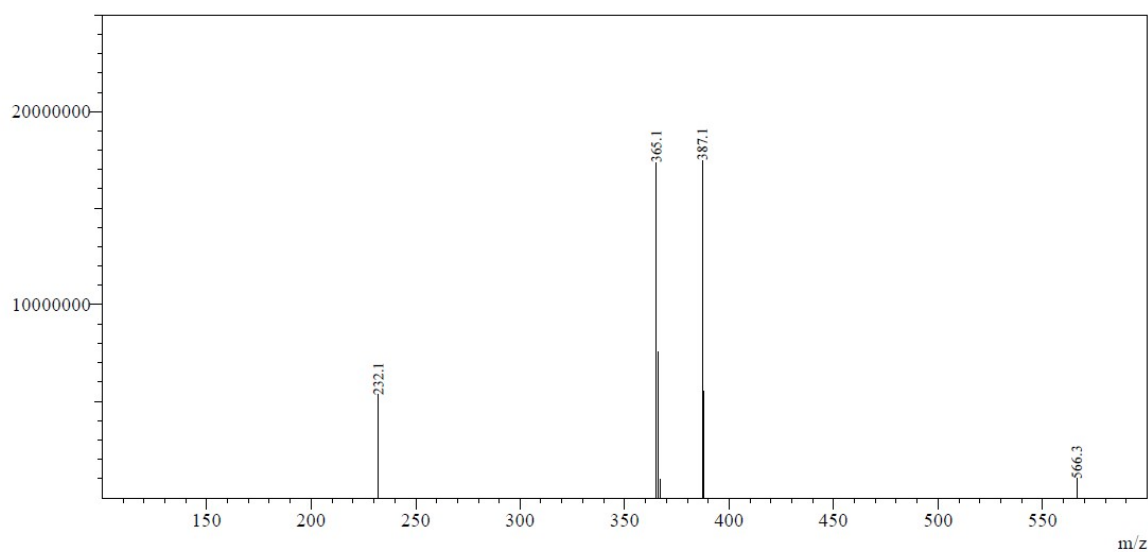

**Figure S34.** LCMS spectra for methyl (1-(5-fluoropentyl)-1*H*-indole-3-carbonyl)-2*R*,3*S*-threoninate (2*R*,3*S*-THR-5F-PICA, **24**).

### UV Chromatogram

mAU

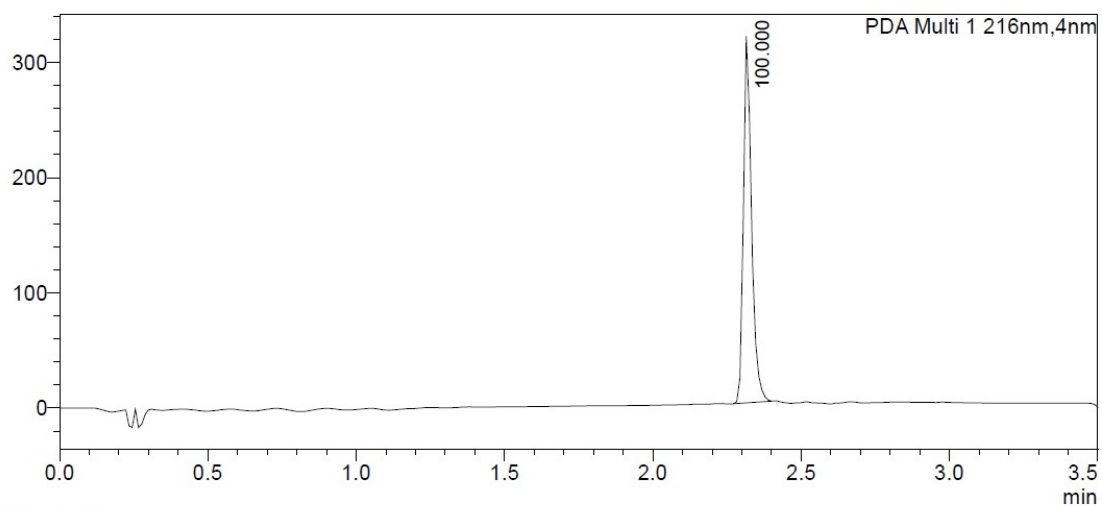

### MS Spectra

Line#:1 R.Time:----(Scan#:----)  
MassPeaks:5 Mode: Positive  
Spectrum Mode:Averaged 2.321-2.342(443-447) Base Peak:365.1(17446089)  
BG Mode:Averaged 0.074-4.400(15-839) Segment 1 - Event 1

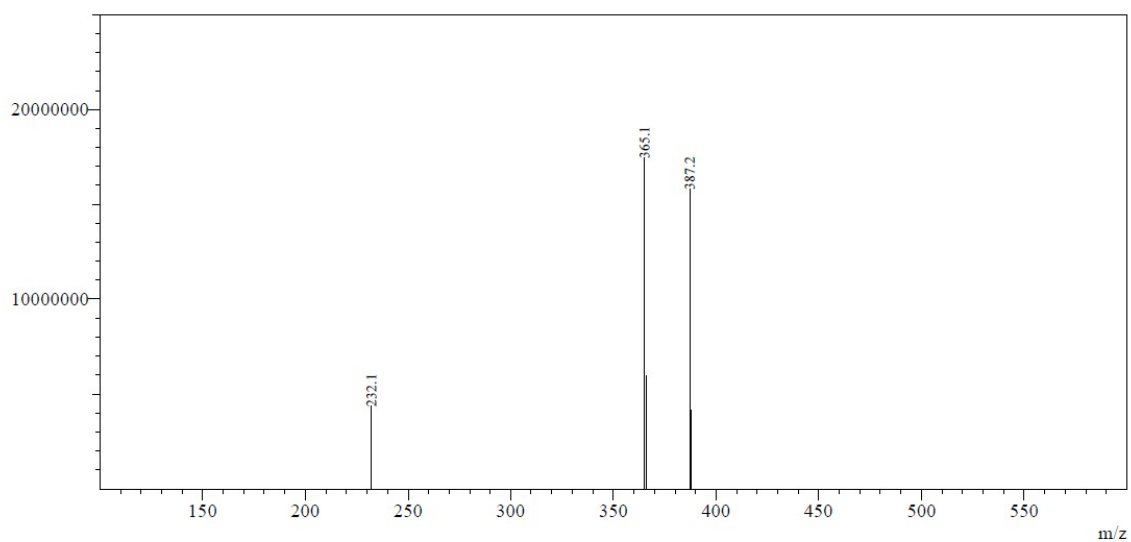

**Figure S35.** LCMS spectra for methyl (1-(5-fluoropentyl)-1*H*-indole-3-carbonyl)-*S*-prolinate (*S*-PRO-5F-PICA, **25**).

### UV Chromatogram

mAU

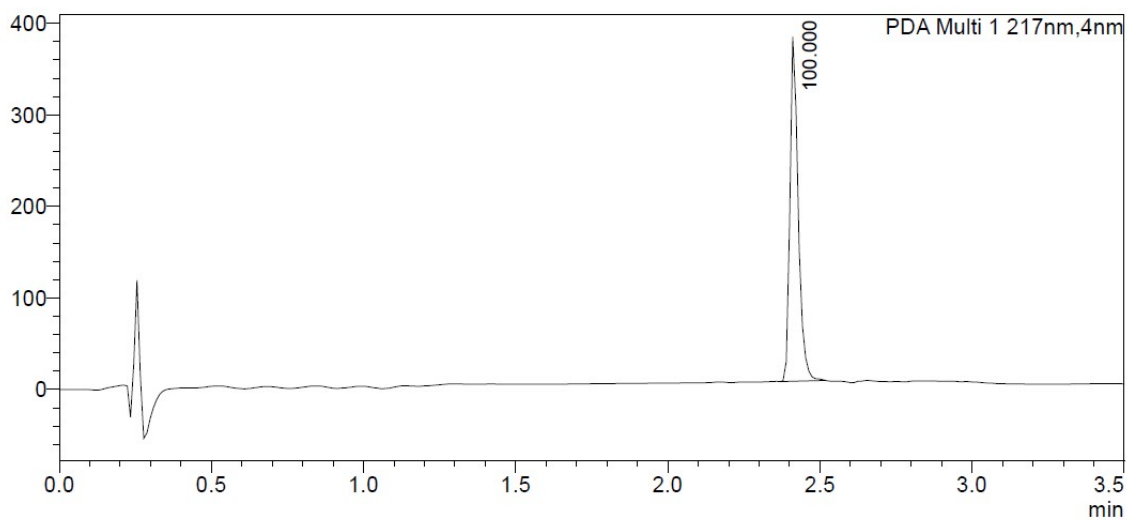

### MS Spectra

Line#:1 R.Time:---(Scan#:---)  
MassPeaks:6 Mode: Positive  
Spectrum Mode:Averaged 2.415-2.436(461-465) Base Peak:361.1(19753459)  
BG Mode:Averaged 0.074-4.368(15-833) Segment 1 - Event 1

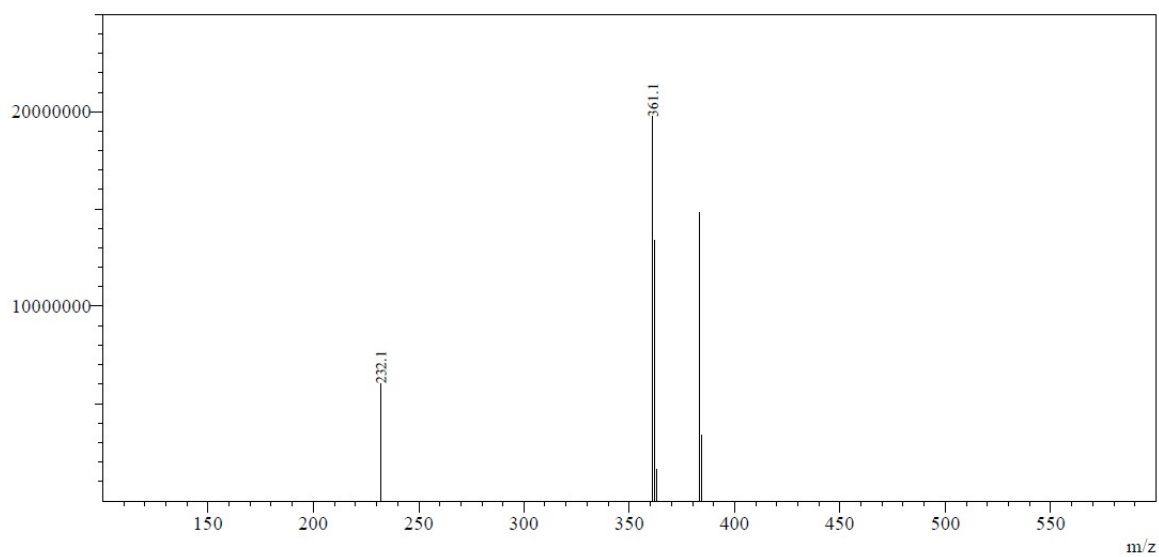

**Figure S36.** LCMS spectra for methyl (1-(5-fluoropentyl)-1*H*-indole-3-carbonyl)-*R*-prolinate (*R*-PRO-5F-PICA, **26**).

### UV Chromatogram

mAU

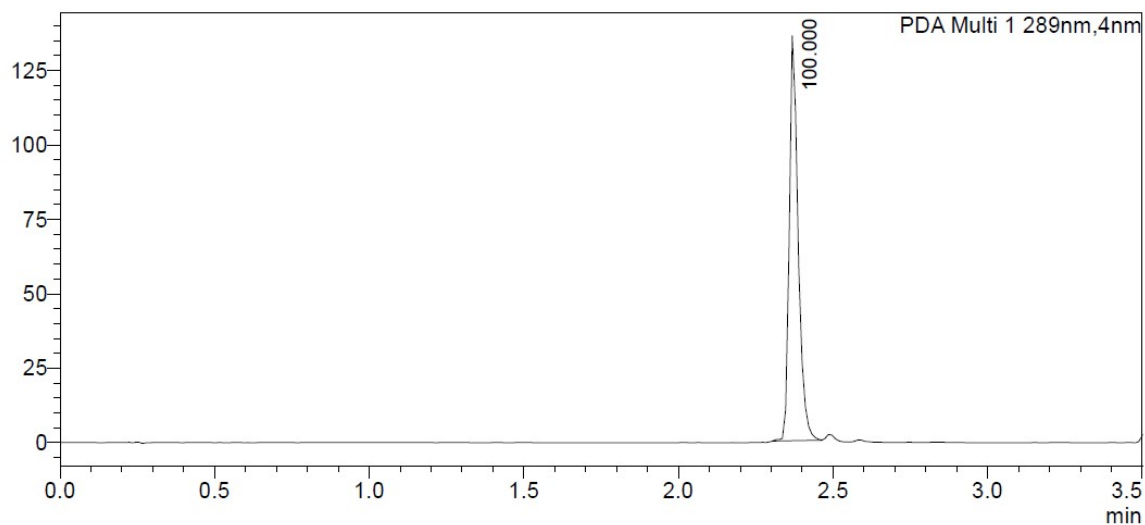

### MS Spectra

Line#:1 R.Time:----(Scan#:----)  
MassPeaks:11 Mode: Positive  
Spectrum Mode:Averaged 2.321-2.457(443-469) Base Peak:361.1(12243786)  
BG Mode:Averaged 1.628-1.953(311-373) Segment 1 - Event 1

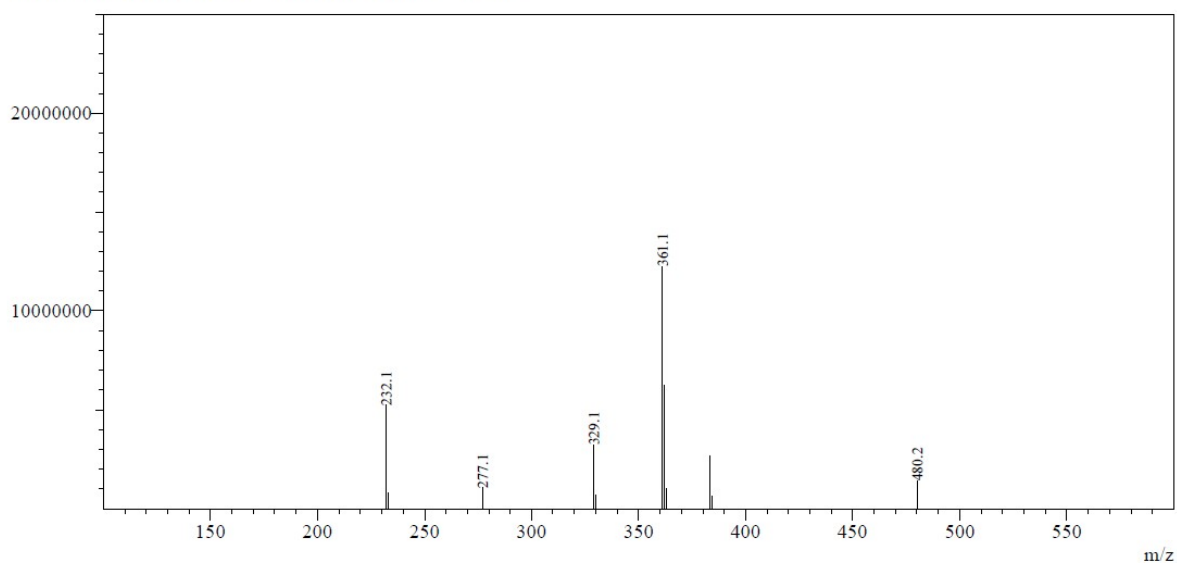

**Figure S37.** LCMS spectra for methyl (1-(5-fluoropentyl)-1*H*-indole-3-carbonyl)-*S*-leucinate (*S*-LEU-5F-PICA, **27**).

### UV Chromatogram

mAU

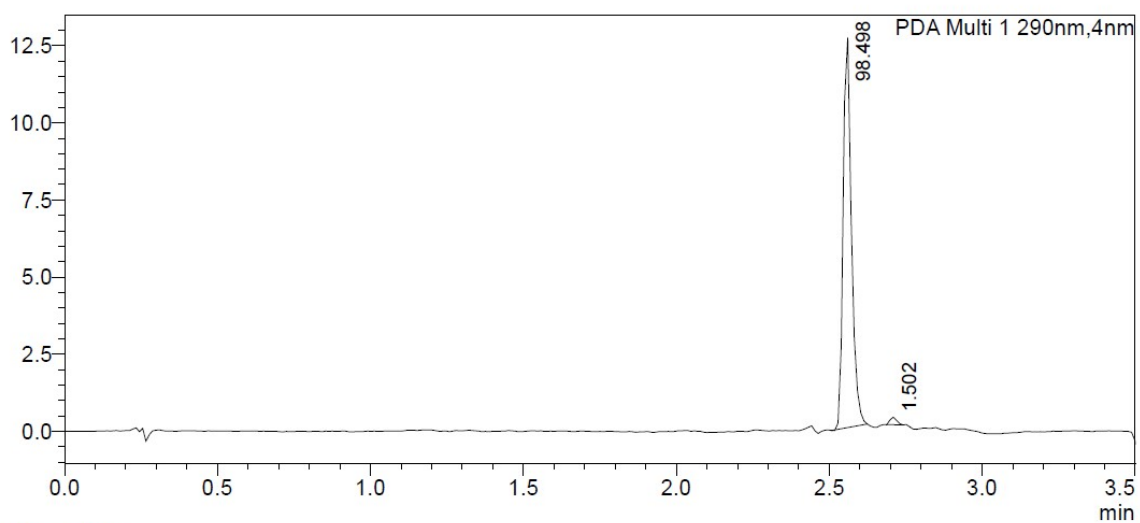

### MS Spectra

Line#:1 R.Time:----(Scan#:----)  
MassPeaks:5 Mode: Positive  
Spectrum Mode:Averaged 2.510-2.615(479-499) Base Peak:377.2(7753698)  
BG Mode:Averaged 1.754-2.415(335-461) Segment 1 - Event 1

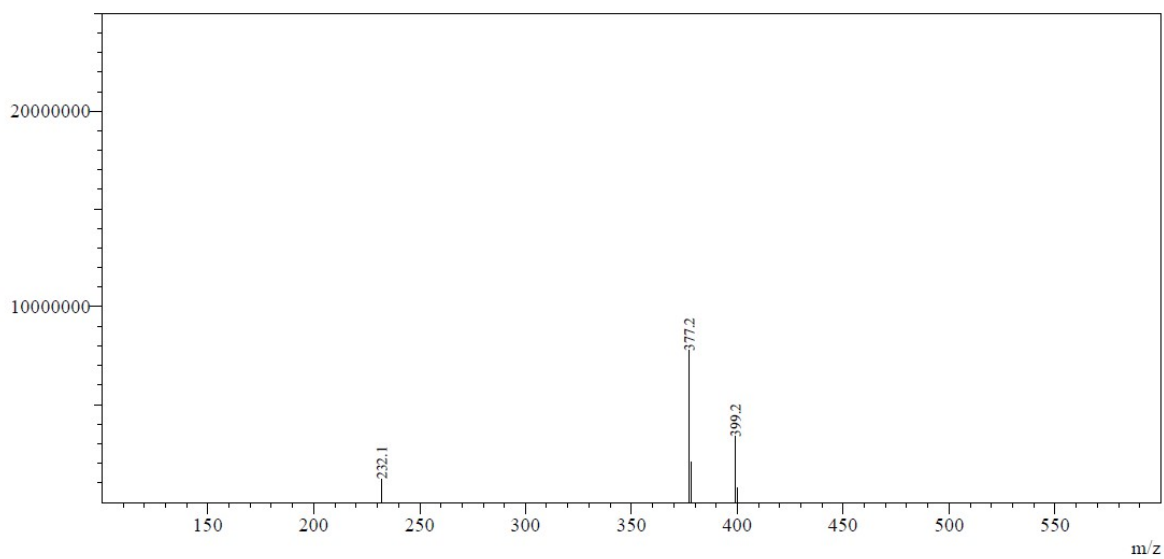

**Figure S38.** LCMS spectra for methyl (1-(5-fluoropentyl)-1*H*-indole-3-carbonyl)-*R*-leucinate (*R*-LEU-5F-PICA, **28**).

### UV Chromatogram

mAU

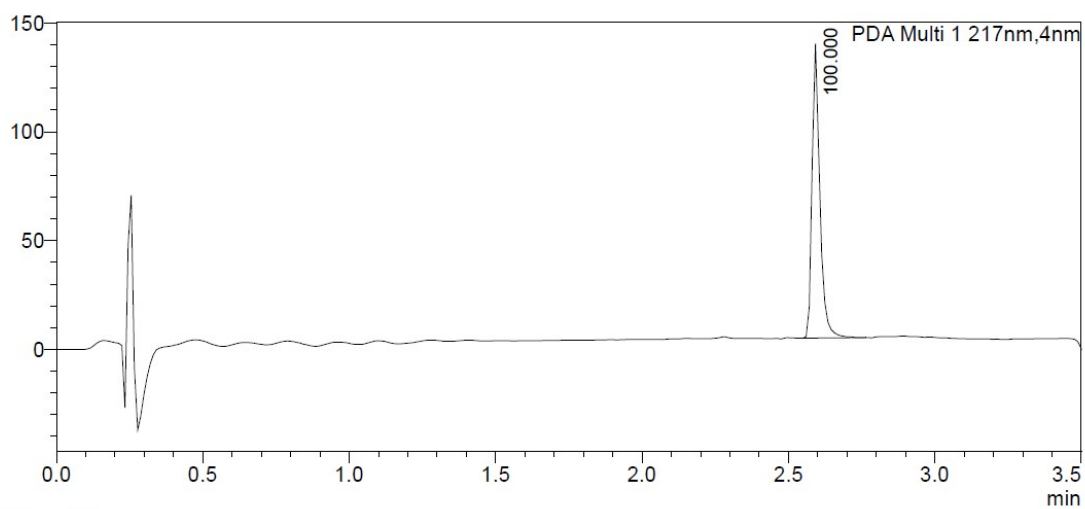

### MS Spectra

Line#:1 R.Time:----(Scan#:----)  
MassPeaks:6 Mode: Positive  
Spectrum Mode:Averaged 2.552-2.667(487-509) Base Peak:399.2(7725972)  
BG Mode:Averaged 1.008-2.048(193-391) Segment 1 - Event 1

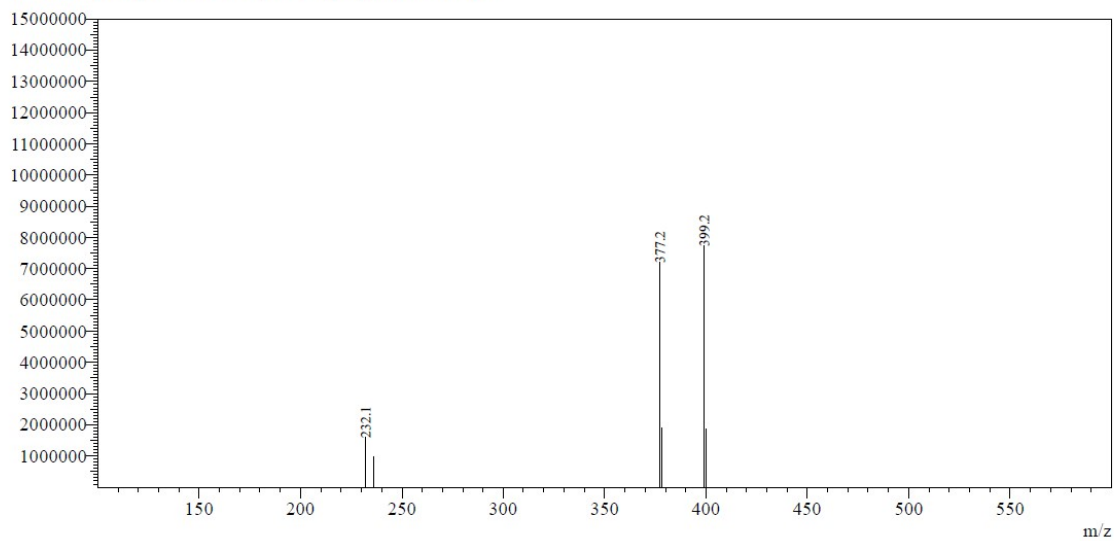

**Figure S39.** LCMS spectra for methyl (1-(5-fluoropentyl)-1*H*-indole-3-carbonyl)-*S*-isoleucinate (*S*-ILE-5F-PICA, **29**).

### UV Chromatogram

mAU

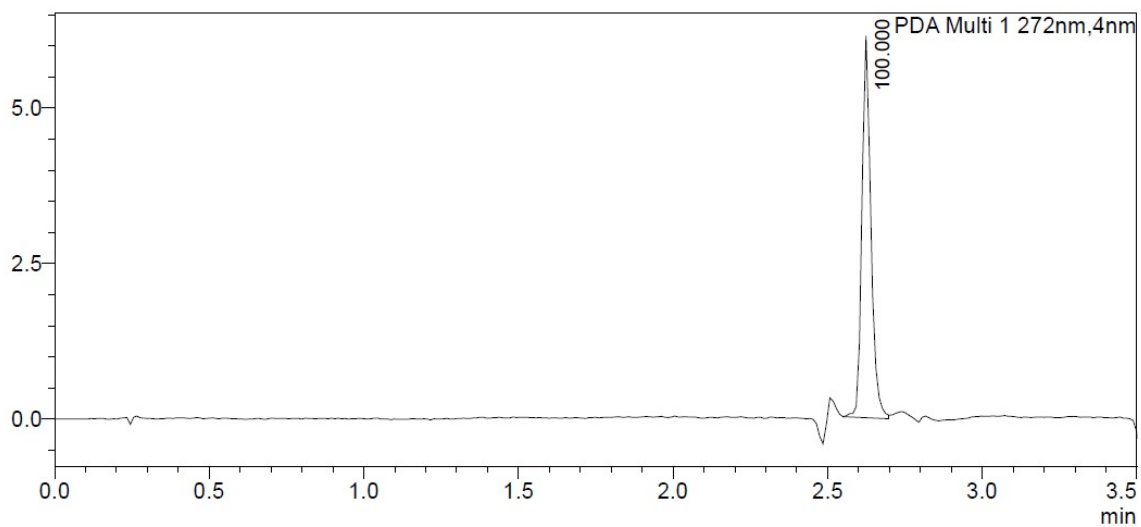

### MS Spectra

Line#:1 R.Time:----(Scan#:----)  
MassPeaks:5 Mode: Positive  
Spectrum Mode:Averaged 2.583-2.699(493-515) Base Peak:377.3(3964375)  
BG Mode:Averaged 1.187-1.523(227-291) Segment 1 - Event 1

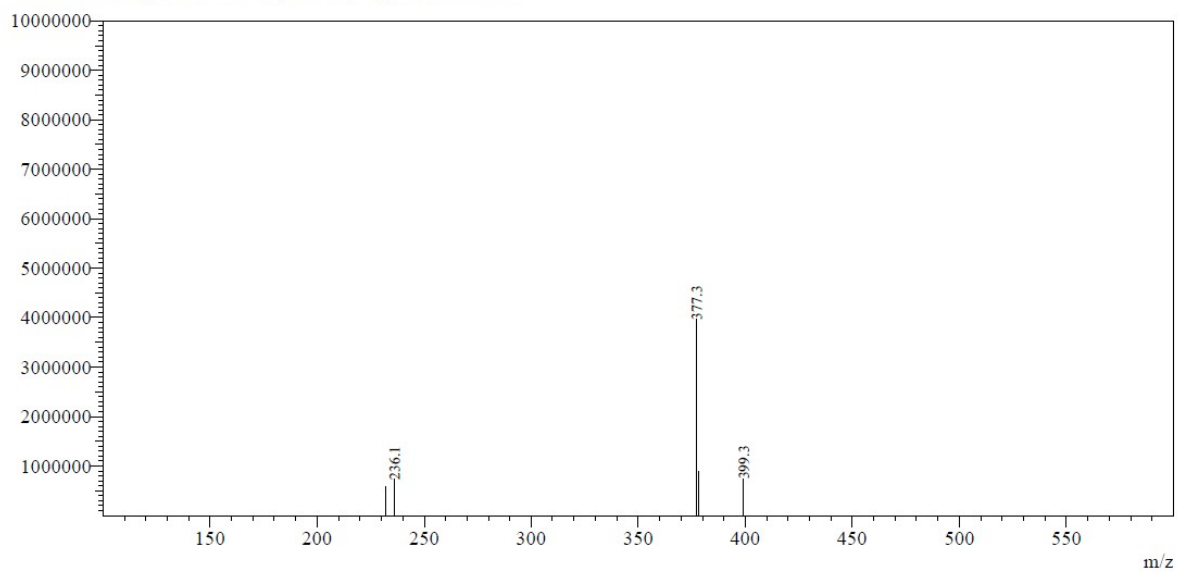



**Figure S40.** LCMS spectra for methyl (1-(5-fluoropentyl)-1*H*-indole-3-carbonyl)-*R*-isoleucinate (*R*-ILE-5F-PICA, **30**).

### UV Chromatogram

mAU

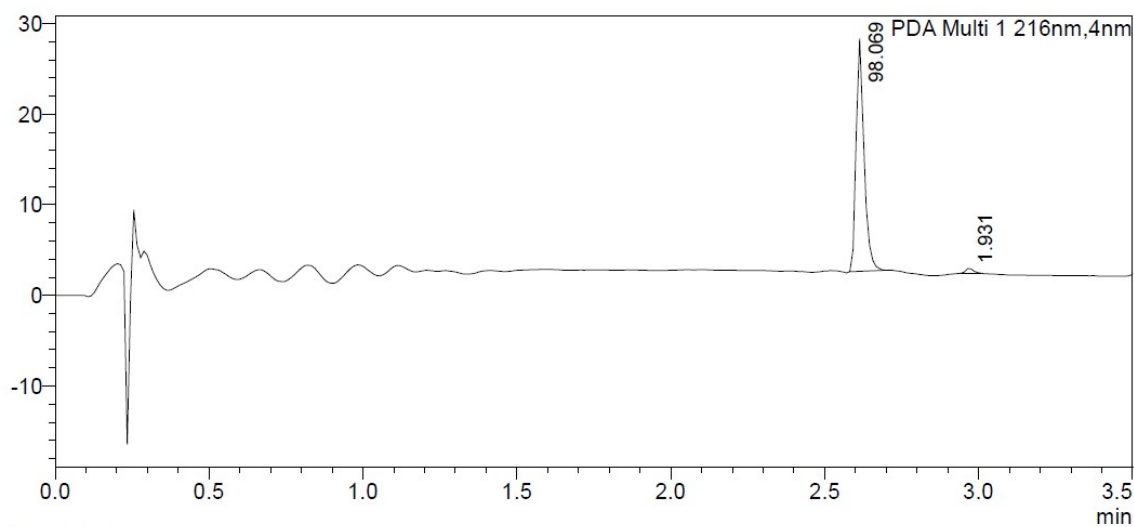

### MS Spectra

Line#:1 R.Time:----(Scan#:----)  
MassPeaks:7 Mode: Positive  
Spectrum Mode:Averaged 2.562-2.699(489-515) Base Peak:399.2(3173545)  
BG Mode:Averaged 1.565-2.069(299-395) Segment 1 - Event 1

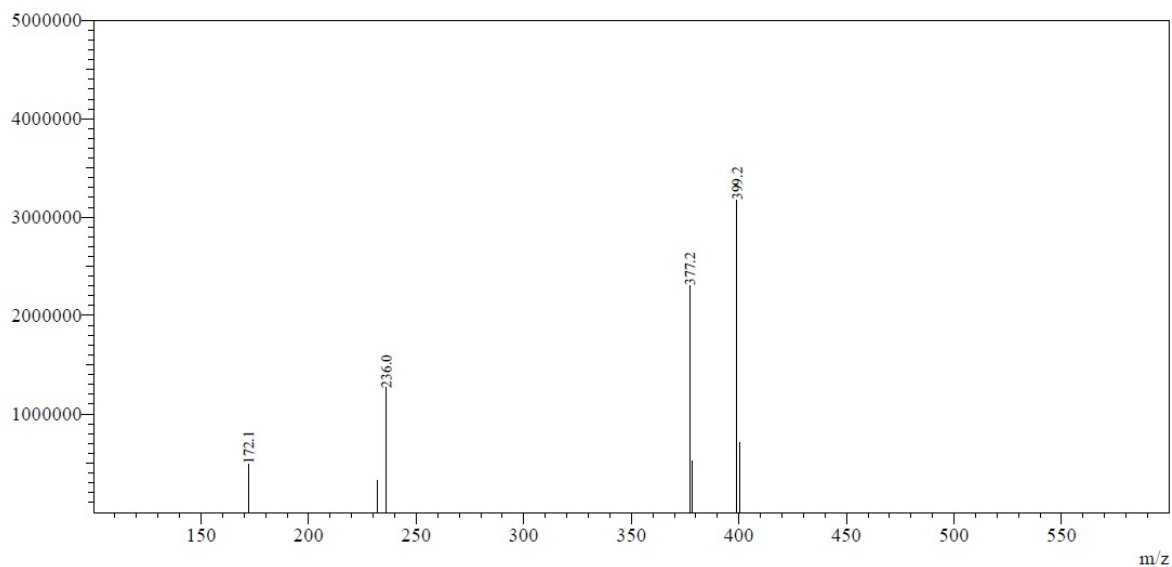

**Figure S41.** LCMS spectra for methyl (*R*)-2-(1-(5-fluoropentyl)-1*H*-indole-3-carboxamido)-3,3-dimethylbutanoate (*R*-MDMB-5F-PICA, **32**).

### UV Chromatogram

mAU

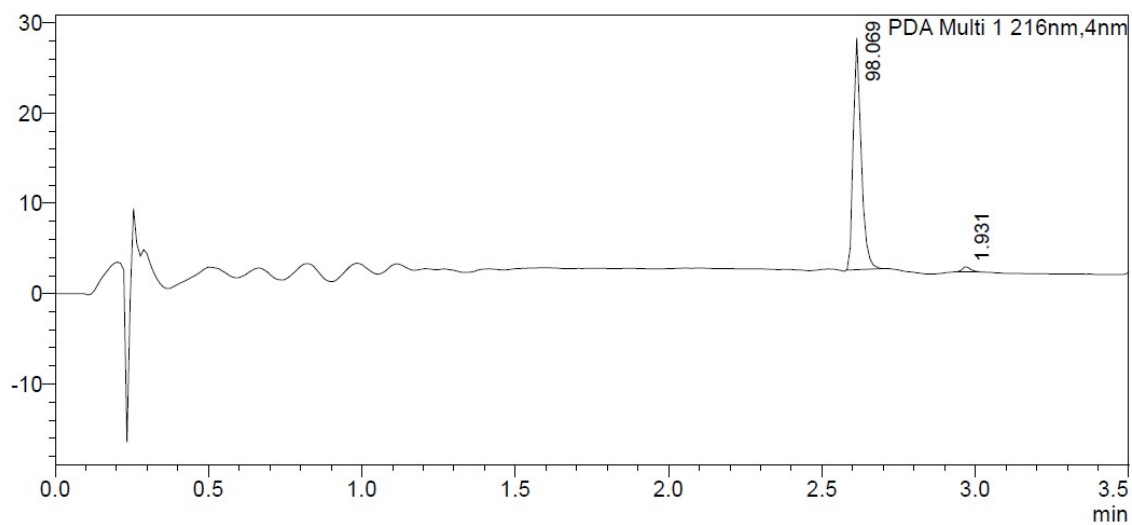

### MS Spectra

Line#:1 R.Time:---(Scan#:---)  
MassPeaks:7 Mode: Positive  
Spectrum Mode:Averaged 2.562-2.699(489-515) Base Peak:399.2(3173545)  
BG Mode:Averaged 1.565-2.069(299-395) Segment 1 - Event 1

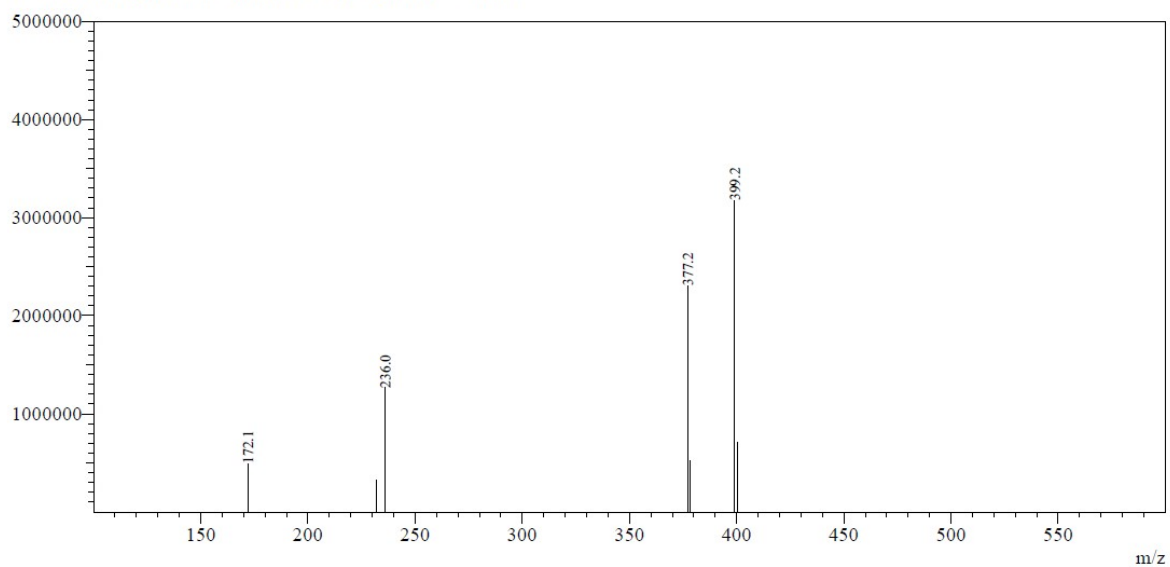

**Figure S42.** LCMS spectra for methyl (1-(5-fluoropentyl)-1*H*-indole-3-carbonyl)-*R*-phenylalaninate (*R*-MPP-5F-PICA, **34**).

### UV Chromatogram

mAU

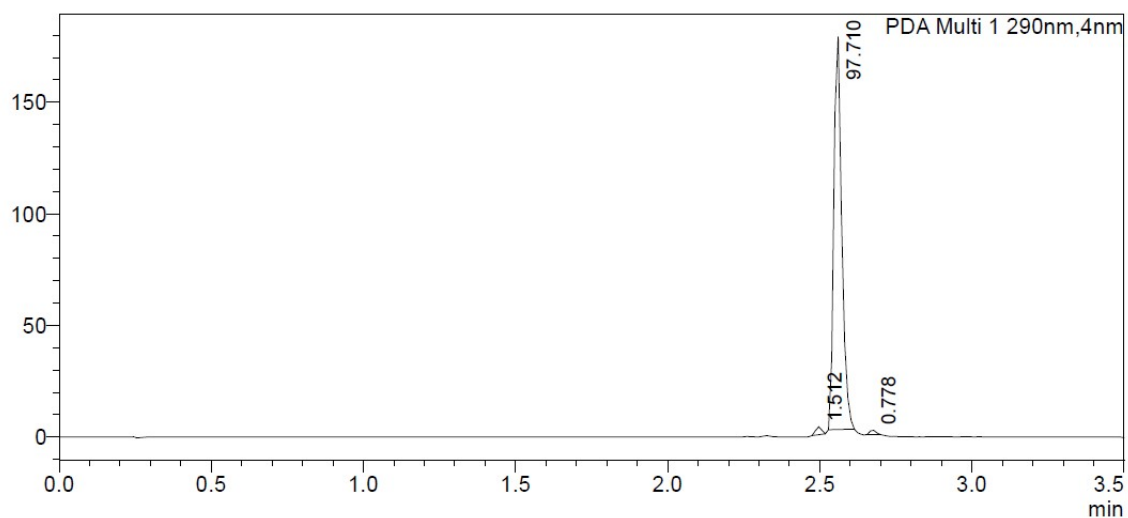

### MS Spectra

Line#:1 R.Time:---(Scan#:---)  
MassPeaks:11 Mode: Positive  
Spectrum Mode:Averaged 2.457-2.699(469-515) Base Peak:411.2(6718031)  
BG Mode:Averaged 1.428-2.100(273-401) Segment 1 - Event 1

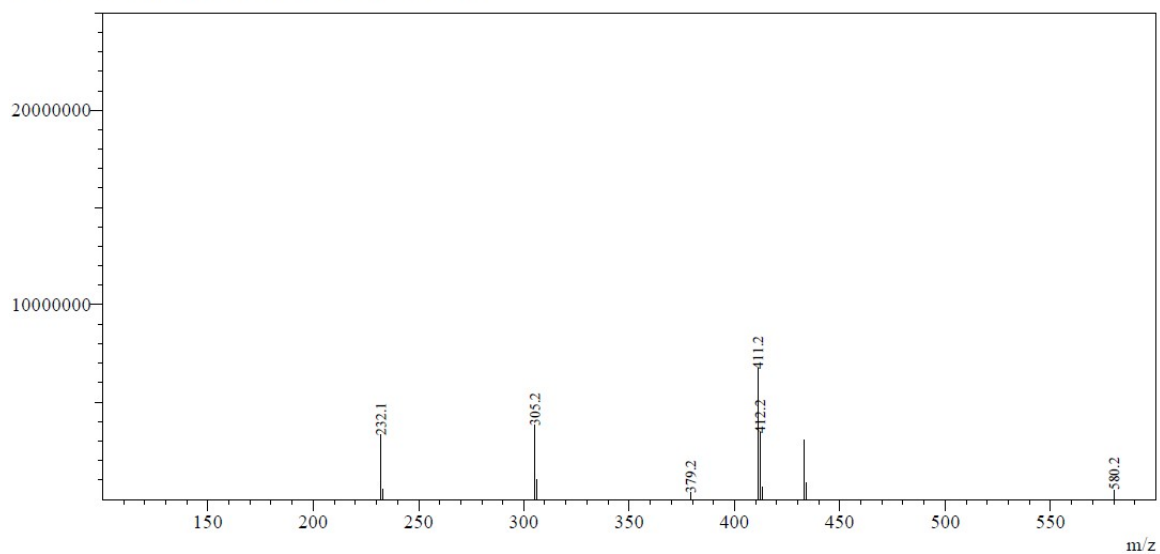

**Figure S43.** LCMS spectra for methyl (1-(5-fluoropentyl)-1*H*-indole-3-carbonyl)-*S*-tyrosinate (*S*-TYR-5F-PICA, **35**).

### UV Chromatogram

mAU

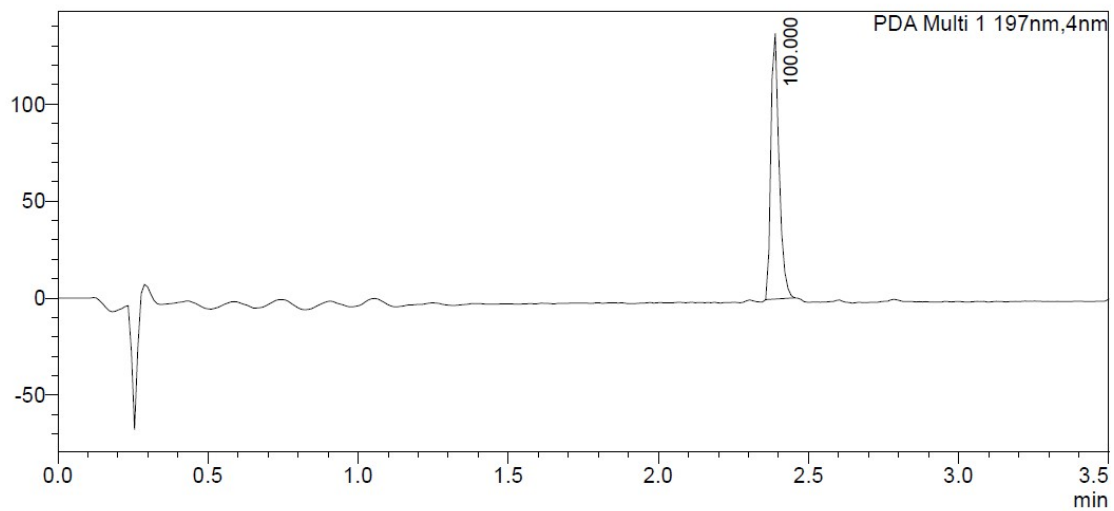

### MS Spectra

Line#:1 R.Time:----(Scan#:----)  
MassPeaks:5 Mode: Positive  
Spectrum Mode:Averaged 2.394-2.415(457-461) Base Peak:427.2(10681895)  
BG Mode:Averaged 0.042-4.463(9-851) Segment 1 - Event 1

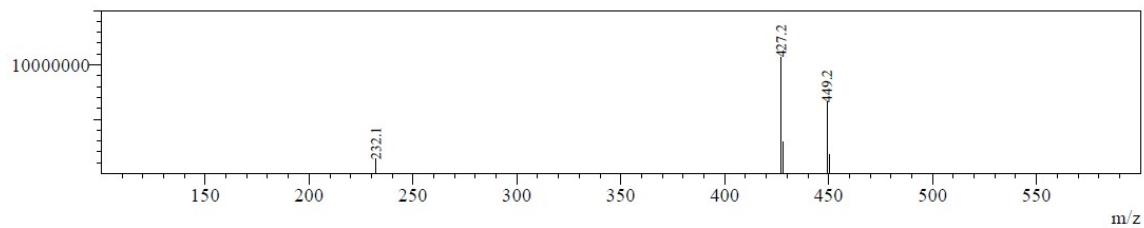

**Figure S44.** LCMS spectra for methyl (1-(5-fluoropentyl)-1*H*-indole-3-carbonyl)-*R*-tyrosinate (*R*-TYR-5F-PICA, **36**).

### UV Chromatogram

mAU

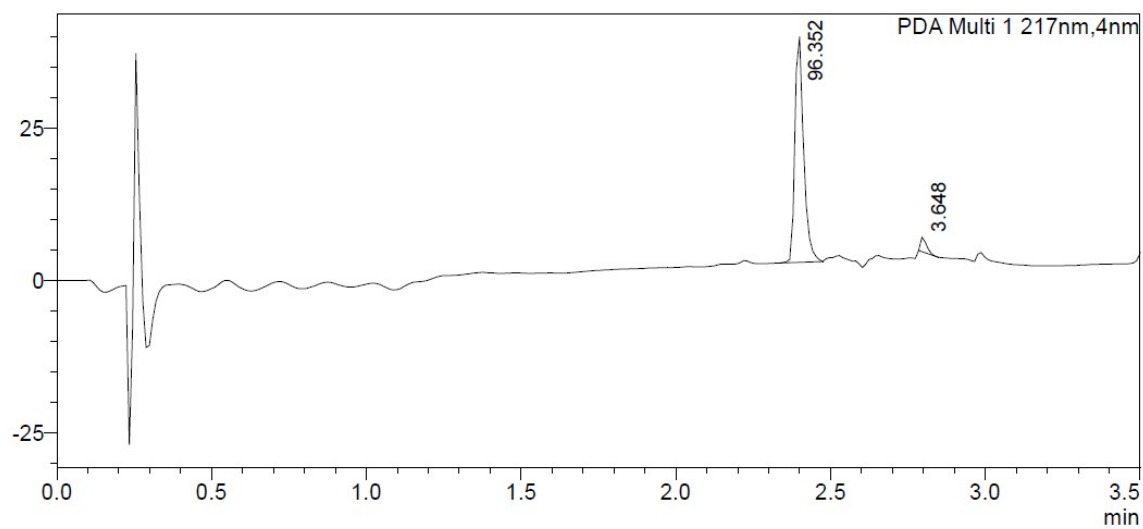

### MS Spectra

Line#:1 R.Time:---(Scan#:---)  
MassPeaks:5 Mode: Positive  
Spectrum Mode:Averaged 2.394-2.415(457-461) Base Peak:449.2(3579634)  
BG Mode:Averaged 0.053-4.400(11-839) Segment 1 - Event 1

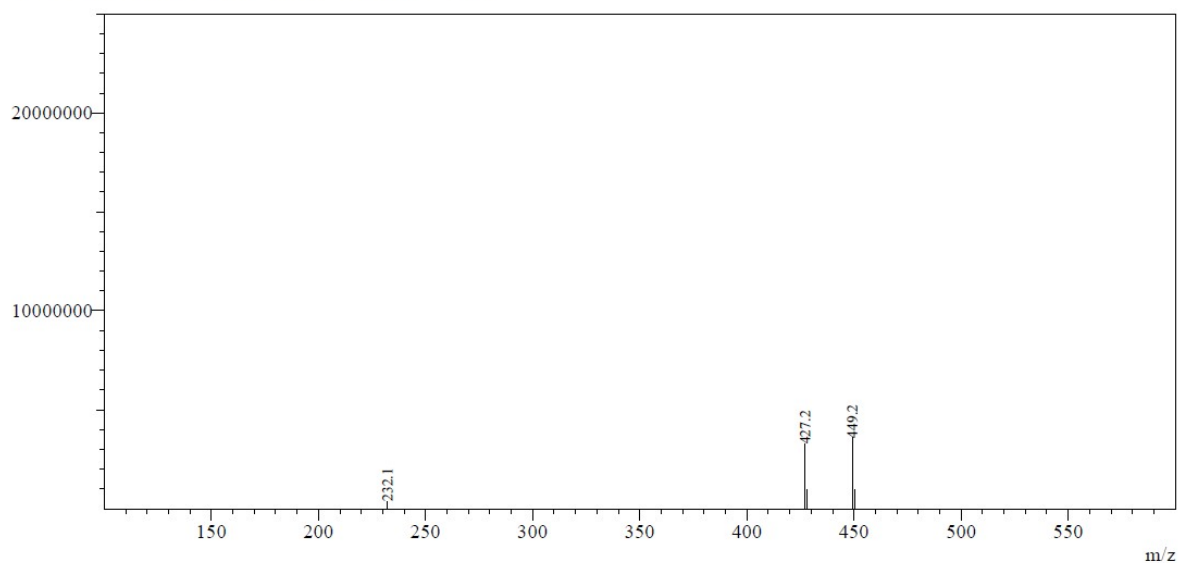

**Figure S45.** LCMS spectra for methyl (1-(5-fluoropentyl)-1*H*-indole-3-carbonyl)-*S*-tryptophanate (*S*-TRP-5F-PICA, **37**).

### UV Chromatogram

mAU

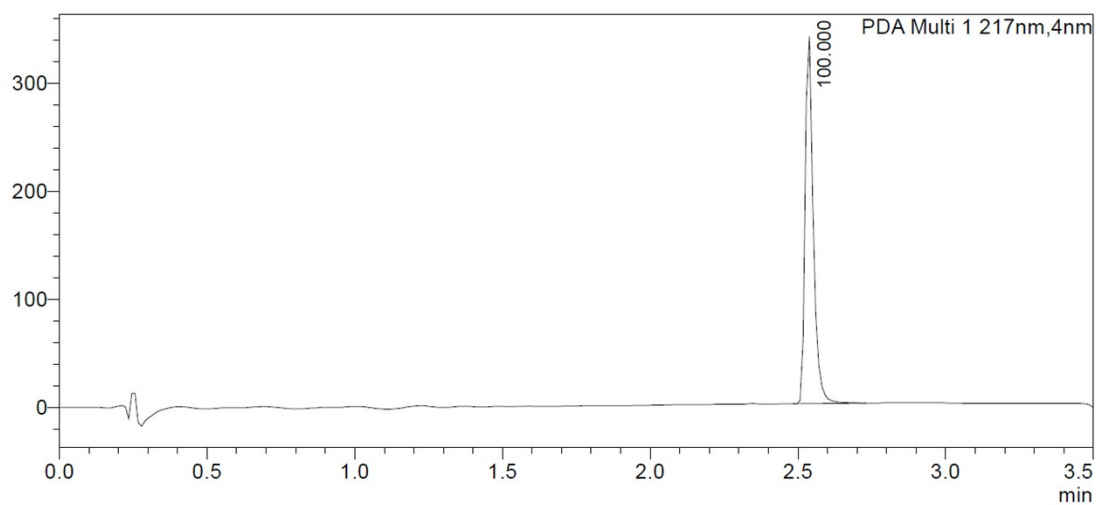

### MS Spectra

Line#:1 R. Time:---(Scan#:---)  
MassPeaks:6 Mode: Positive  
Spectrum Mode:Averaged 2.541-2.552(485-487) Base Peak:450.2(14490289)  
BG Mode:Averaged 0.032-4.421(7-843) Segment 1 - Event 1

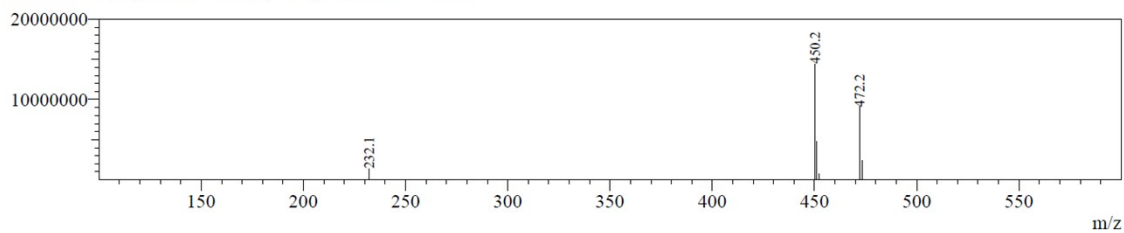

**Figure S46.** LCMS spectra for methyl (1-(5-fluoropentyl)-1*H*-indole-3-carbonyl)-*R*-tryptophanate (*R*-TRP-5F-PICA, **38**).

### UV Chromatogram

mAU

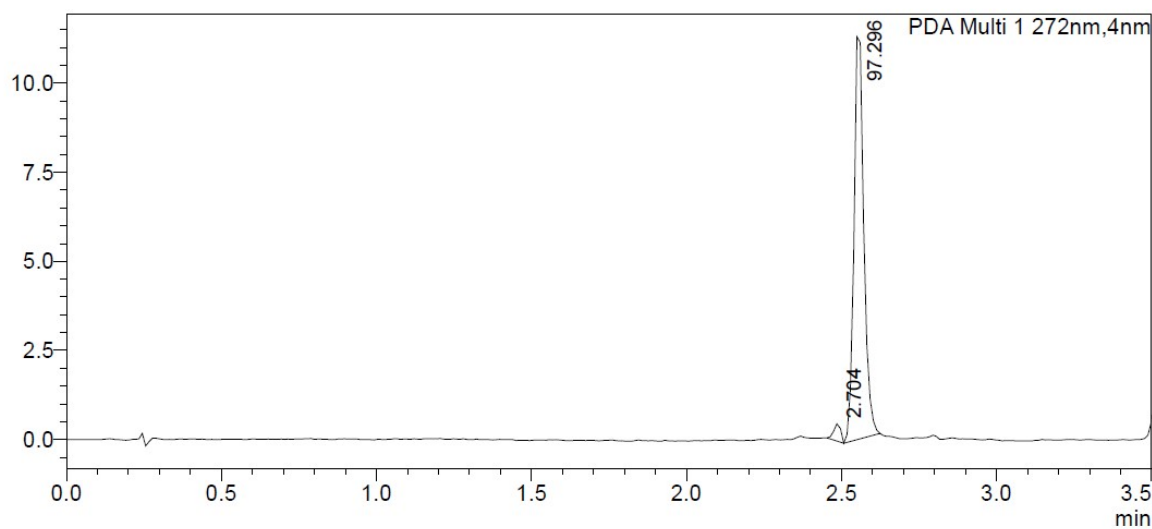

### MS Spectra

Line#:1 R. Time:----(Scan#:----)  
MassPeaks:8 Mode: Positive  
Spectrum Mode:Averaged 2.478-2.636(473-503) Base Peak:450.3(2020082)  
BG Mode:Averaged 0.903-1.292(173-247) Segment 1 - Event 1

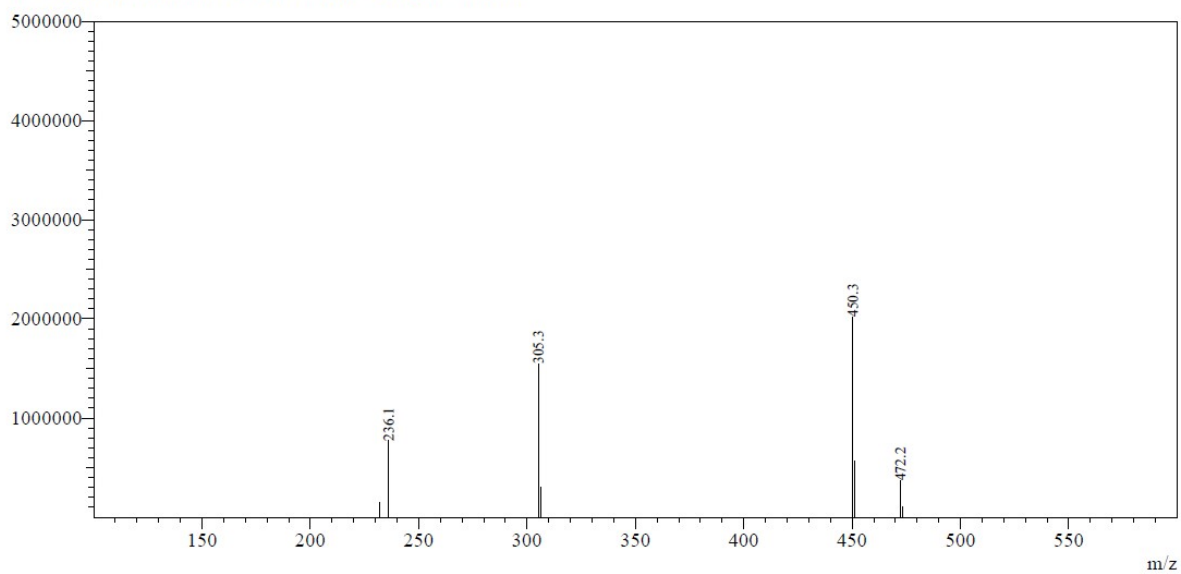

**Figure S47.** LCMS spectra for methyl *N*<sup>6</sup>-(tert-butoxycarbonyl)-*N*<sup>2</sup>-(1-(5-fluoropentyl)-1*H*-indole-3-carbonyl)-*S*-lysinate (**39a**)

**UV Chromatogram**

mAU

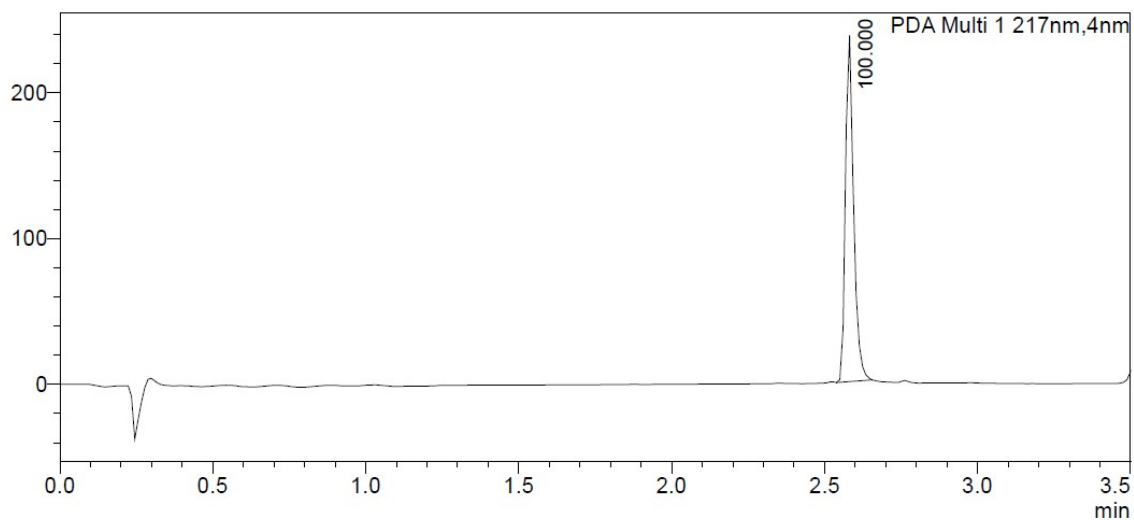

**MS Spectra**

Line#:1 R.Time:----(Scan#:----)  
MassPeaks:12 Mode: Positive  
Spectrum Mode:Averaged 2.573-2.604(491-497) Base Peak:514.2(14878315)  
BG Mode:Averaged 0.084-4.442(17-847) Segment 1 - Event 1

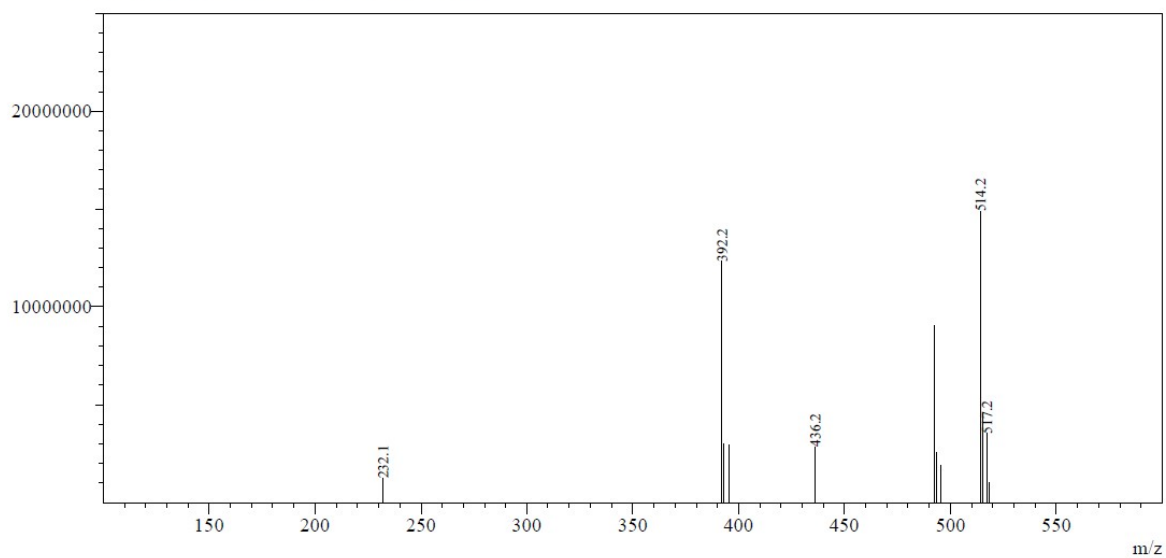



**Figure S48.** LCMS spectra for methyl (1-(5-fluoropentyl)-1*H*-indole-3-carbonyl)-*S*-lysinate (*S*-LYS-5F-PICA 39).

### UV Chromatogram

mAU

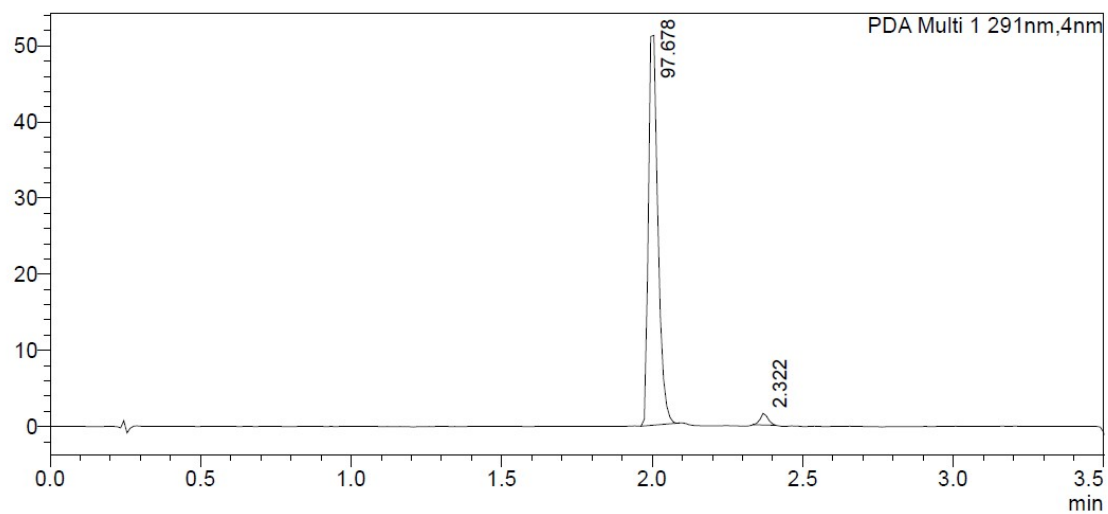

### MS Spectra

Line#:1 R.Time:----(Scan#:----)  
MassPeaks:5 Mode: Positive  
Spectrum Mode:Averaged 1.943-2.079(371-397) Base Peak:392.2(10334432)  
BG Mode:Averaged 1.292-1.701(247-325) Segment 1 - Event 1

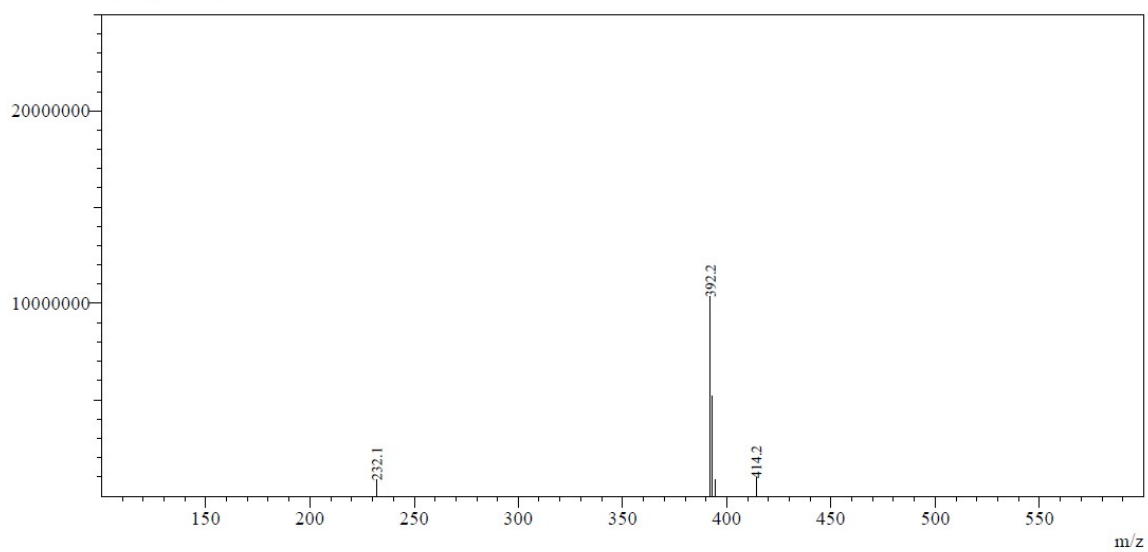

**Figure S49.** LCMS spectra for methyl *N*<sup>6</sup>-(tert-butoxycarbonyl)-*N*<sup>2</sup>-(1-(5-fluoropentyl)-1*H*-indole-3-carbonyl)-*R*-lysinate (**40a**).

**UV Chromatogram**

mAU

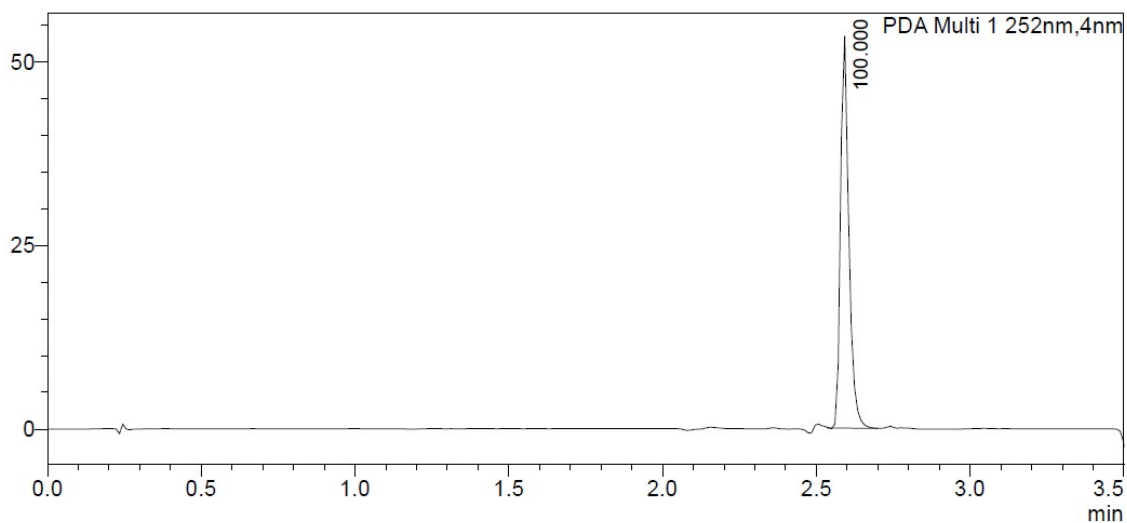

**MS Spectra**

Line#:1 R. Time:----(Scan#:----)  
MassPeaks:11 Mode: Positive  
Spectrum Mode:Averaged 2.510-2.657(479-507) Base Peak:392.2(8125304)  
BG Mode:Averaged 1.649-2.237(315-427) Segment 1 - Event 1

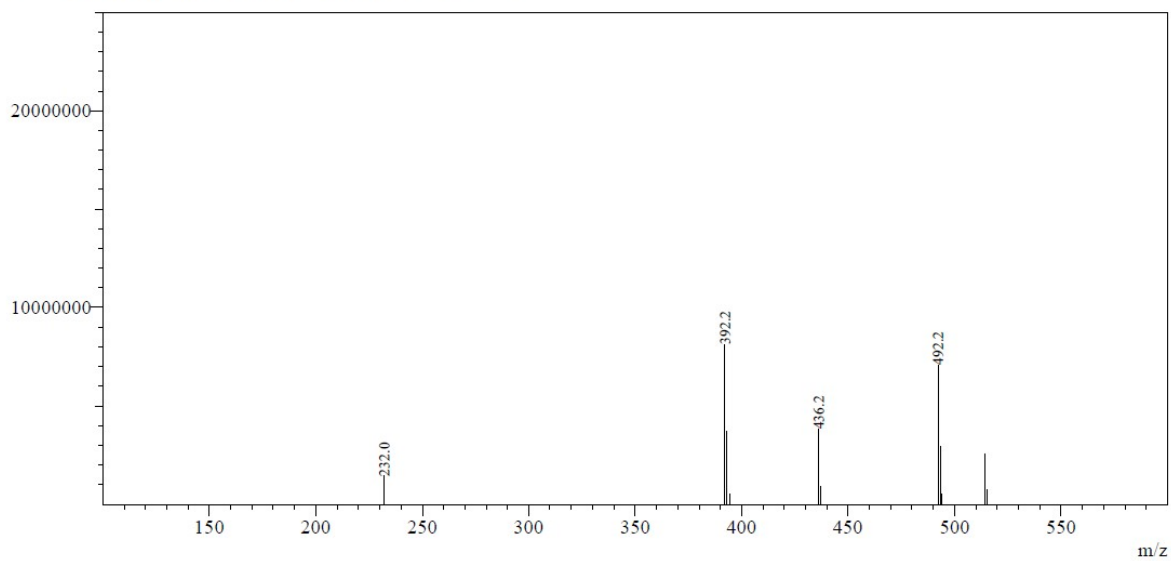

**Figure S50.** LCMS spectra for methyl (1-(5-fluoropentyl)-1*H*-indole-3-carbonyl)-*R*-lysinate (*R*-LYS-5F-PICA, **40**).

### UV Chromatogram

mAU

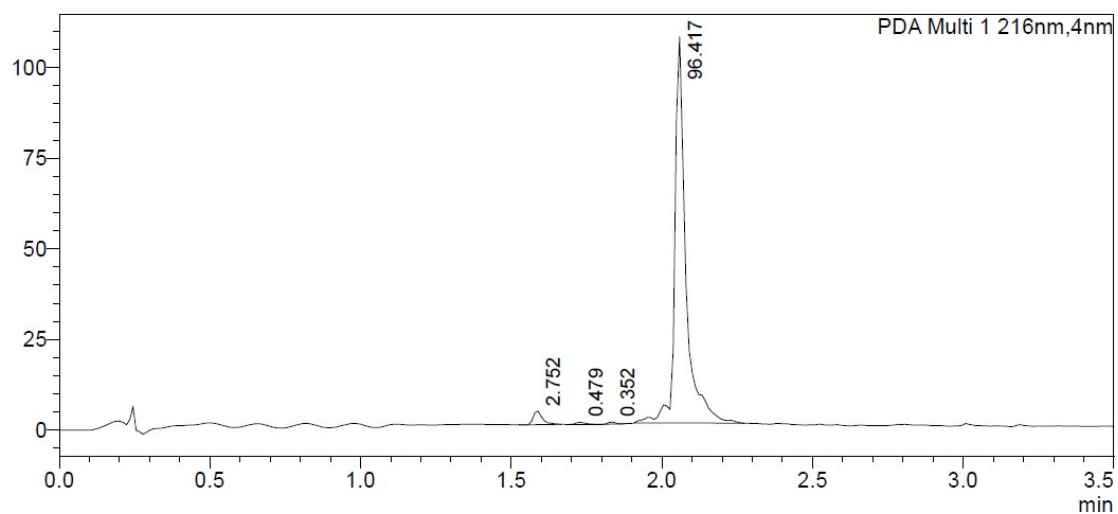

### MS Spectra

Line#:1 R.Time:----(Scan#:----)  
MassPeaks:4 Mode: Positive  
Spectrum Mode:Averaged 2.048-2.079(391-397) Base Peak:392.3(17143219)  
BG Mode:Averaged 0.021-4.484(5-855) Segment 1 - Event 1

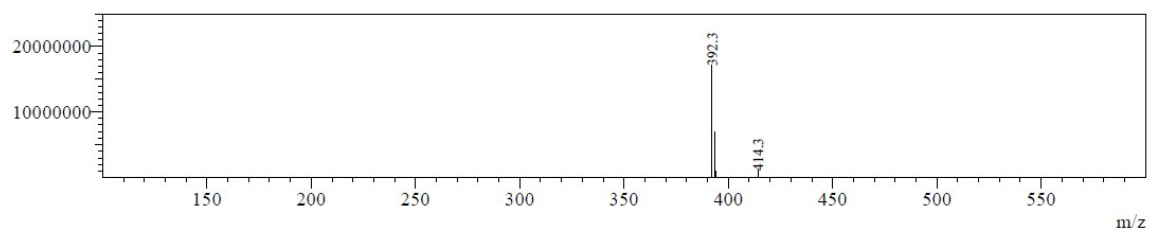

**Figure S51.** LCMS spectra for methyl (1-(5-fluoropentyl)-1*H*-indole-3-carbonyl)-*S*-methioninate (*S*-MET-5F-PICA, **41**).

### UV Chromatogram

mAU

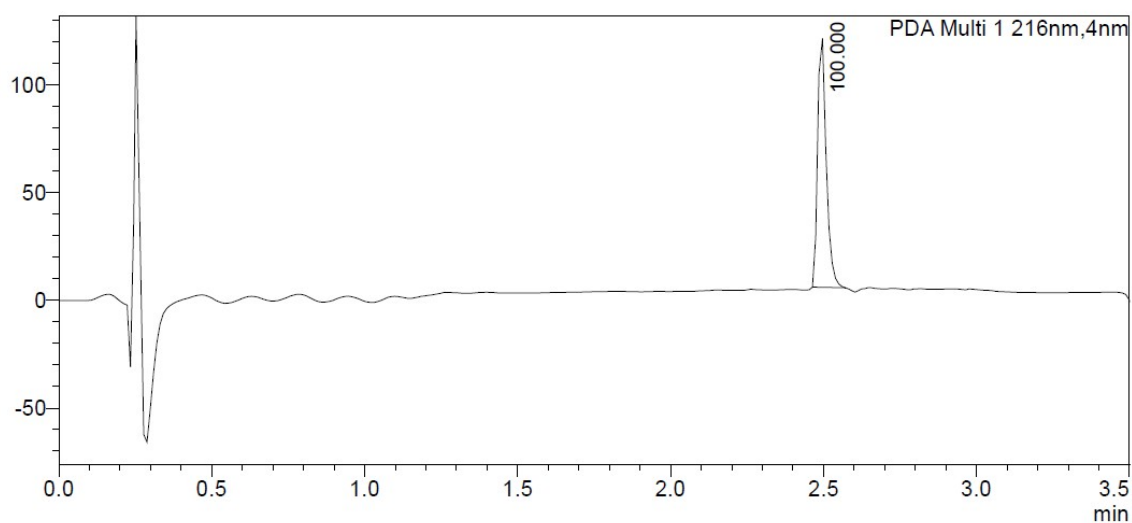

### MS Spectra

Line#:1 R.Time:---(Scan#:---)  
MassPeaks:7 Mode: Positive  
Spectrum Mode:Averaged 2.489-2.510(475-479) Base Peak:395.2(13450163)  
BG Mode:Averaged 0.053-4.358(11-831) Segment 1 - Event 1

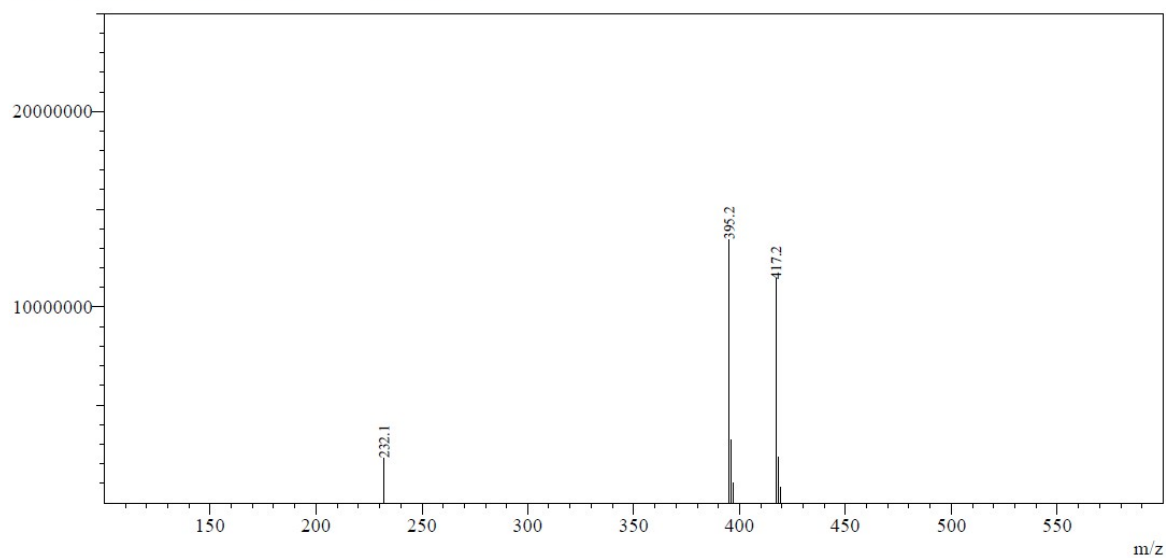

**Figure S52.** LCMS spectra for methyl (1-(5-fluoropentyl)-1*H*-indole-3-carbonyl)-*R*-methioninate (*R*-MET-5F-PICA, **42**).

### UV Chromatogram

mAU

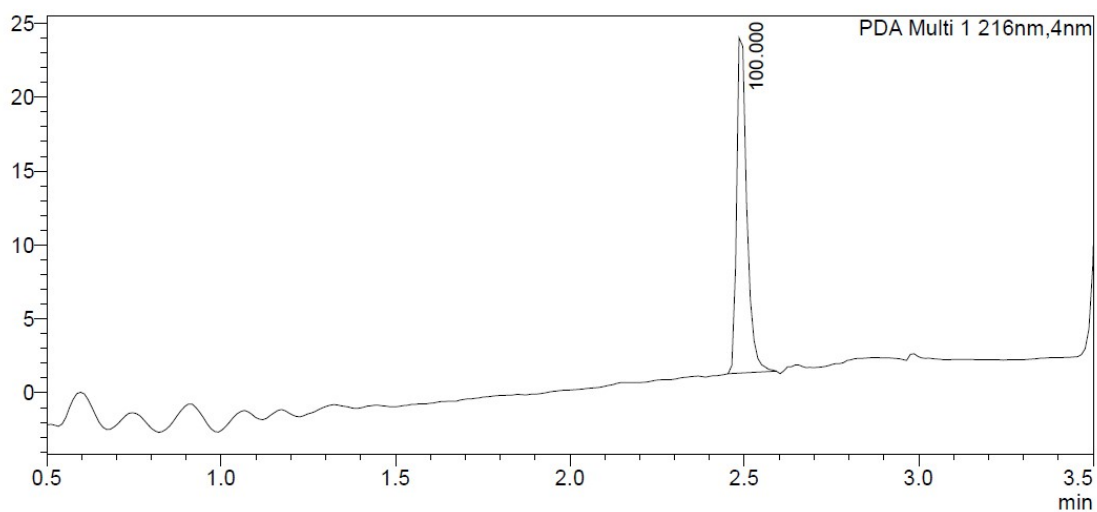

### MS Spectra

Line#:1 R.Time:----(Scan#:----)  
MassPeaks:8 Mode: Positive  
Spectrum Mode:Averaged 2.489-2.531(475-483) Base Peak:417.1(4811180)  
BG Mode:Averaged 0.105-4.358(21-831) Segment 1 - Event 1

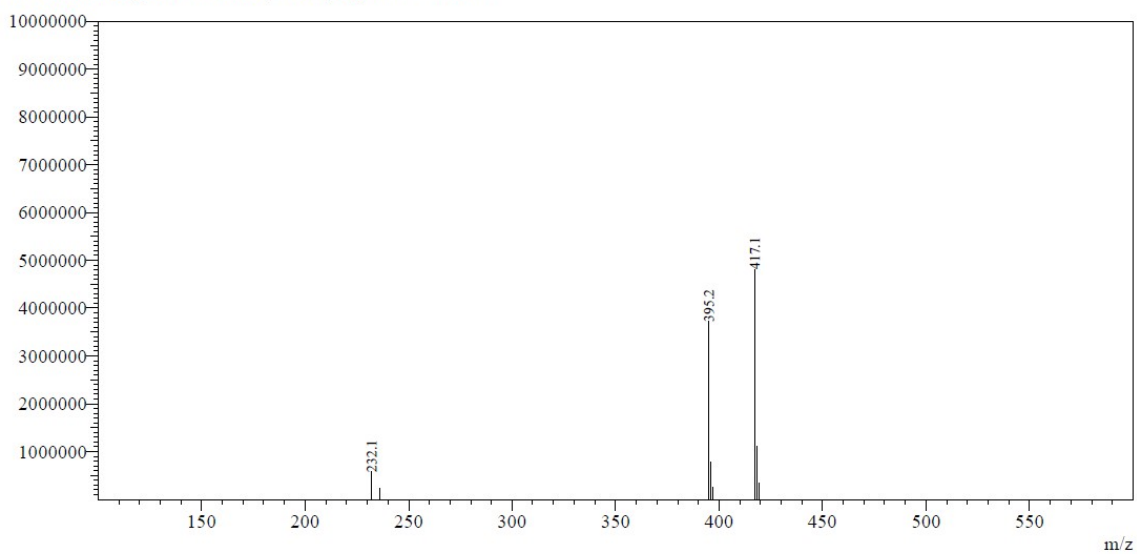

**Figure S53.** LCMS spectra for *tert*-butyl (S)-5-amino-2-(1-(5-fluoropentyl)-1*H*-indole-3-carboxamido)-5-oxopentanoate (**43a**)

**UV Chromatogram**

mAU

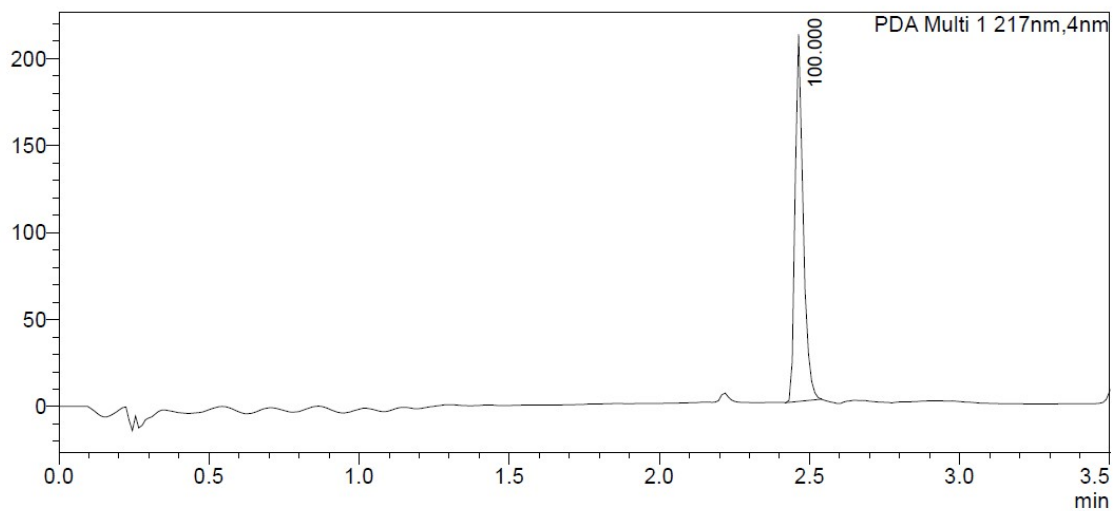

**MS Spectra**

Line#:1 R.Time:----(Scan#:----)  
MassPeaks:8 Mode: Positive  
Spectrum Mode:Averaged 2.457-2.499(469-477) Base Peak:434.2(13542104)  
BG Mode:Averaged 0.074-4.400(15-839) Segment 1 - Event 1

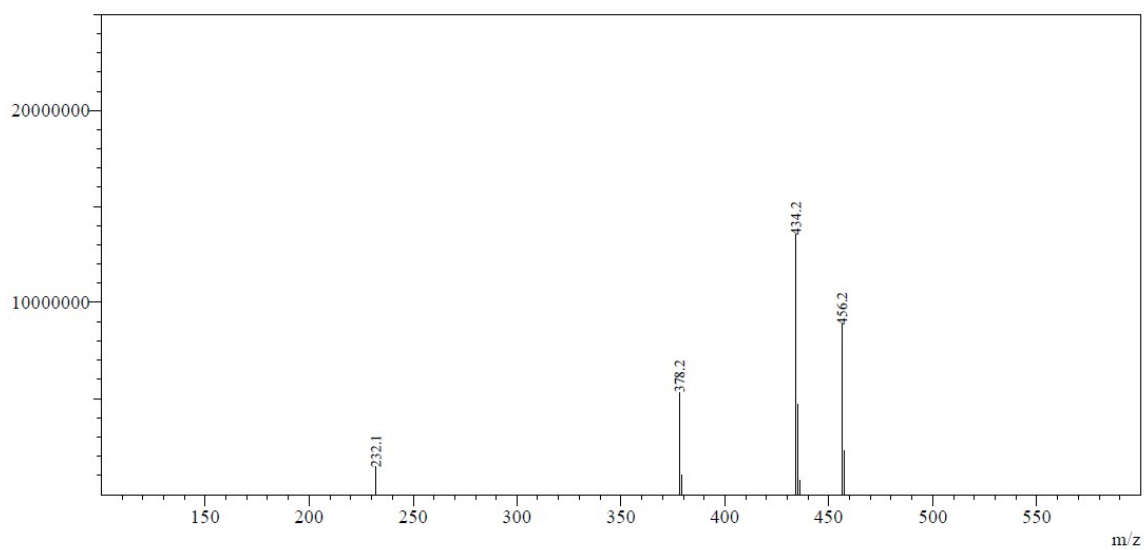

**Figure S54.** LCMS spectra for methyl (S)-5-amino-2-(1-(5-fluoropentyl)-1H-indole-3-carboxamido)-5-oxopentanoate (S-GLN-5F-PICA, **43**).

### UV Chromatogram

mAU

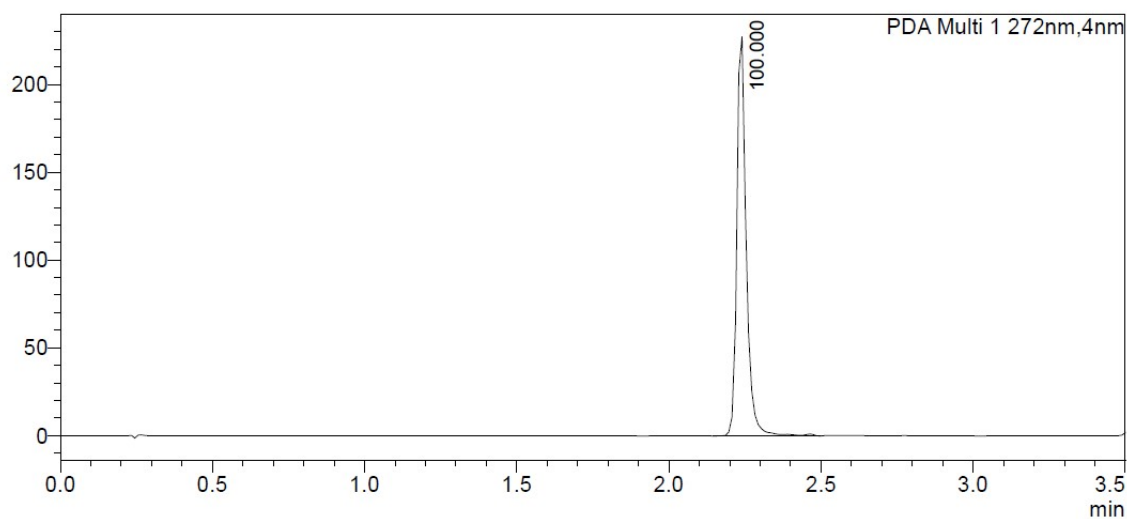

### MS Spectra

Line#:1 R.Time:---(Scan#:---)  
MassPeaks:7 Mode: Positive  
Spectrum Mode:Averaged 2.184-2.405(417-459) Base Peak:392.2(9788160)  
BG Mode:Averaged 1.008-1.775(193-339) Segment 1 - Event 1

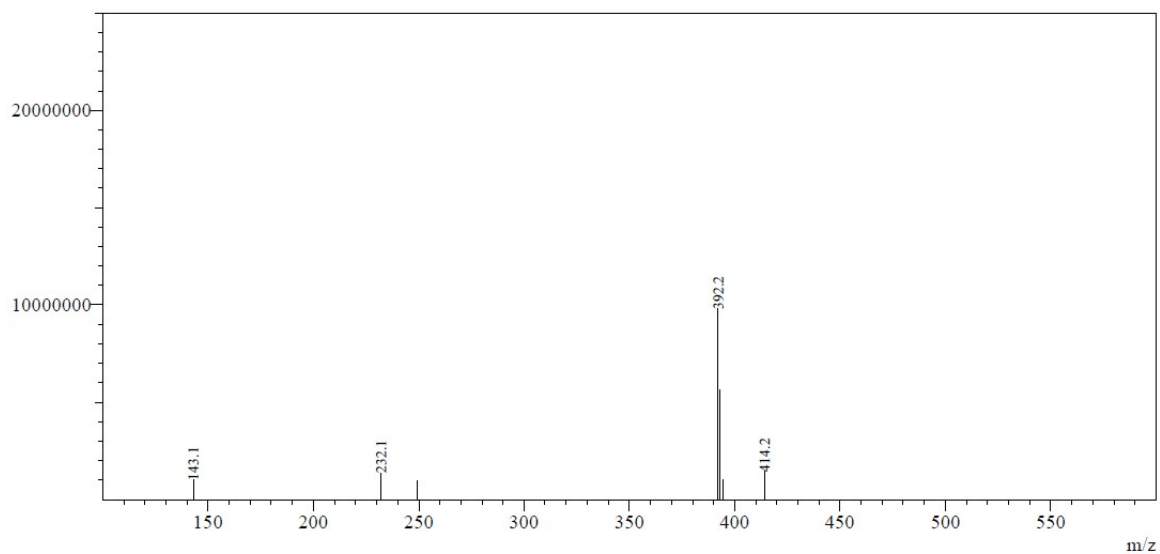

**Figure S55.** LCMS spectra for methyl (R)-5-amino-2-(1-(5-fluoropentyl)-1*H*-indole-3-carboxamido)-5-oxopentanoate (*R*-GLN-5F-PICA, **44**).

### UV Chromatogram

mAU

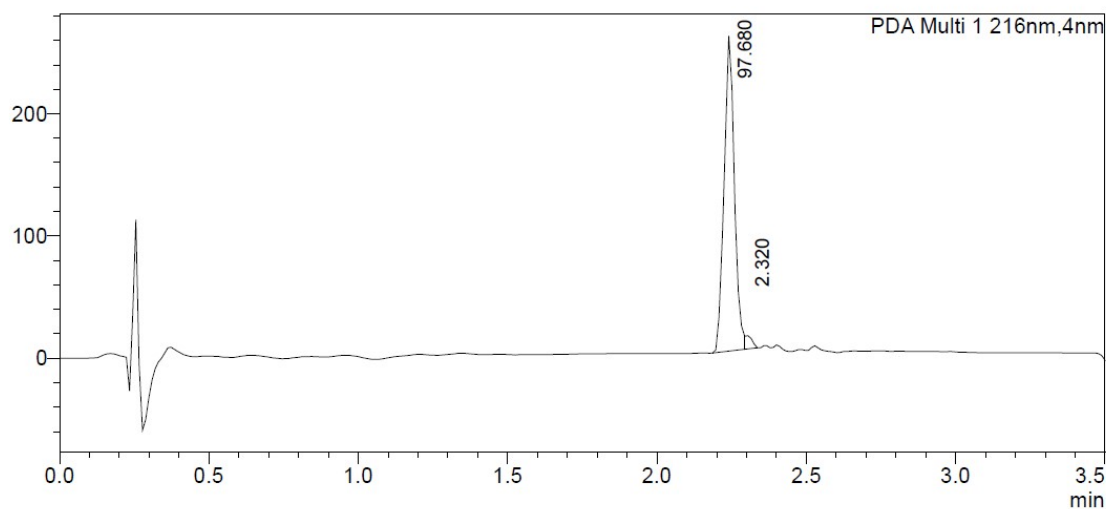

### MS Spectra

Line#:1 R.Time:----(Scan#:----)  
MassPeaks:10 Mode: Positive  
Spectrum Mode:Averaged 2.226-2.268(425-433) Base Peak:392.2(12070248)  
BG Mode:Averaged 0.000-4.421(1-843) Segment 1 - Event 1

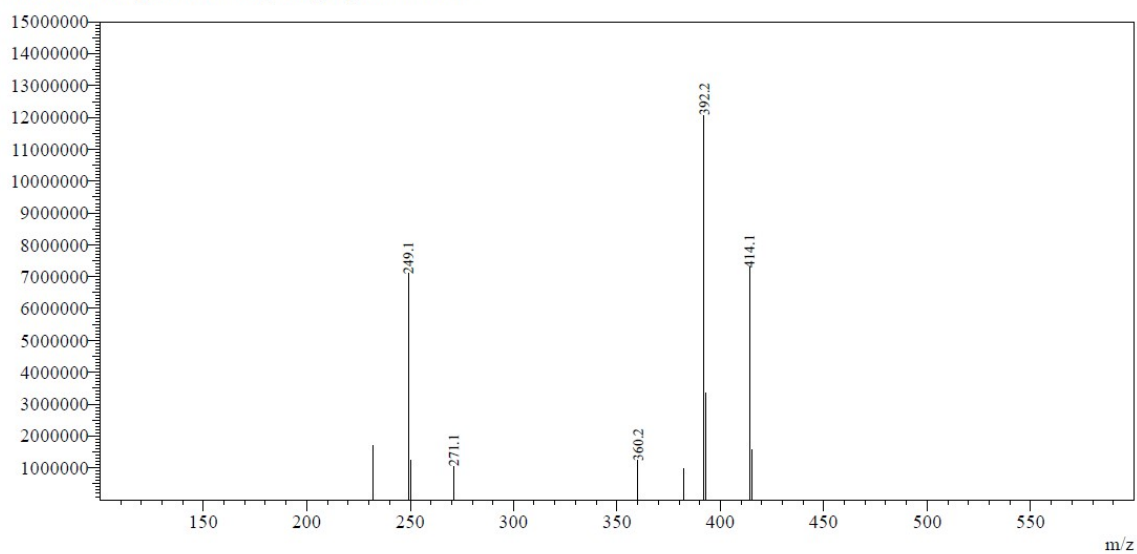



**Figure S56.** HRMS spectrum for methyl (1-(5-fluoropentyl)-1*H*-indole-3-carbonyl)glycinate (GLY-5F-PICA, **16**).

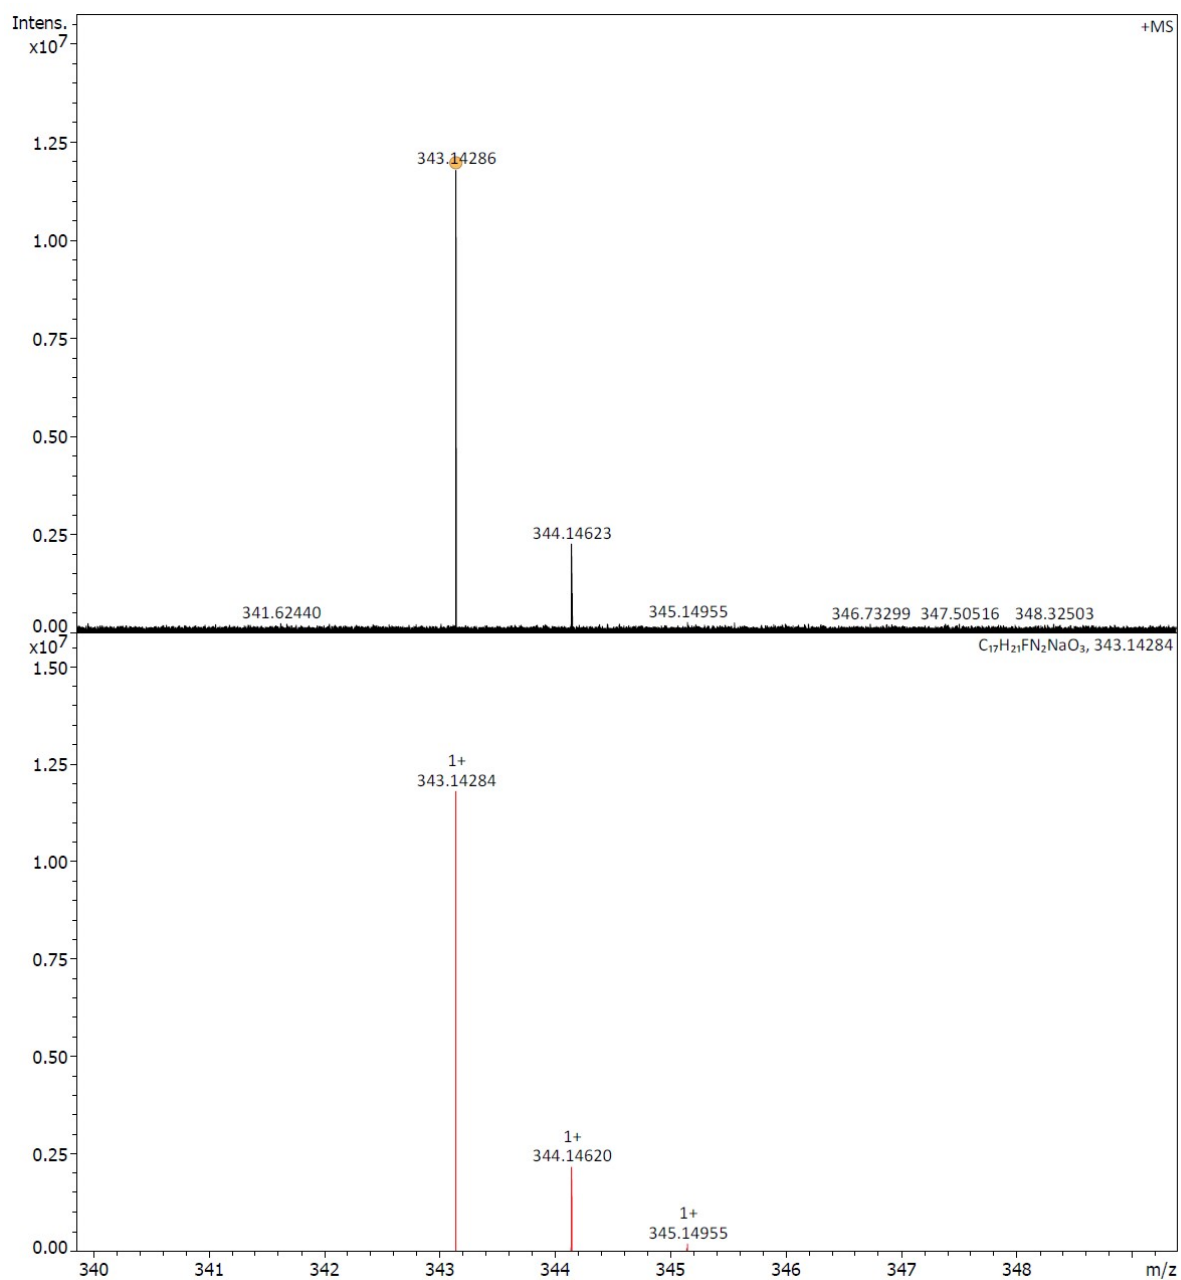

**Figure S57.** HRMS spectrum for methyl (1-(5-fluoropentyl)-1*H*-indole-3-carbonyl)-*S*-alaninate (*S*-ALA-5F-PICA, **17**).

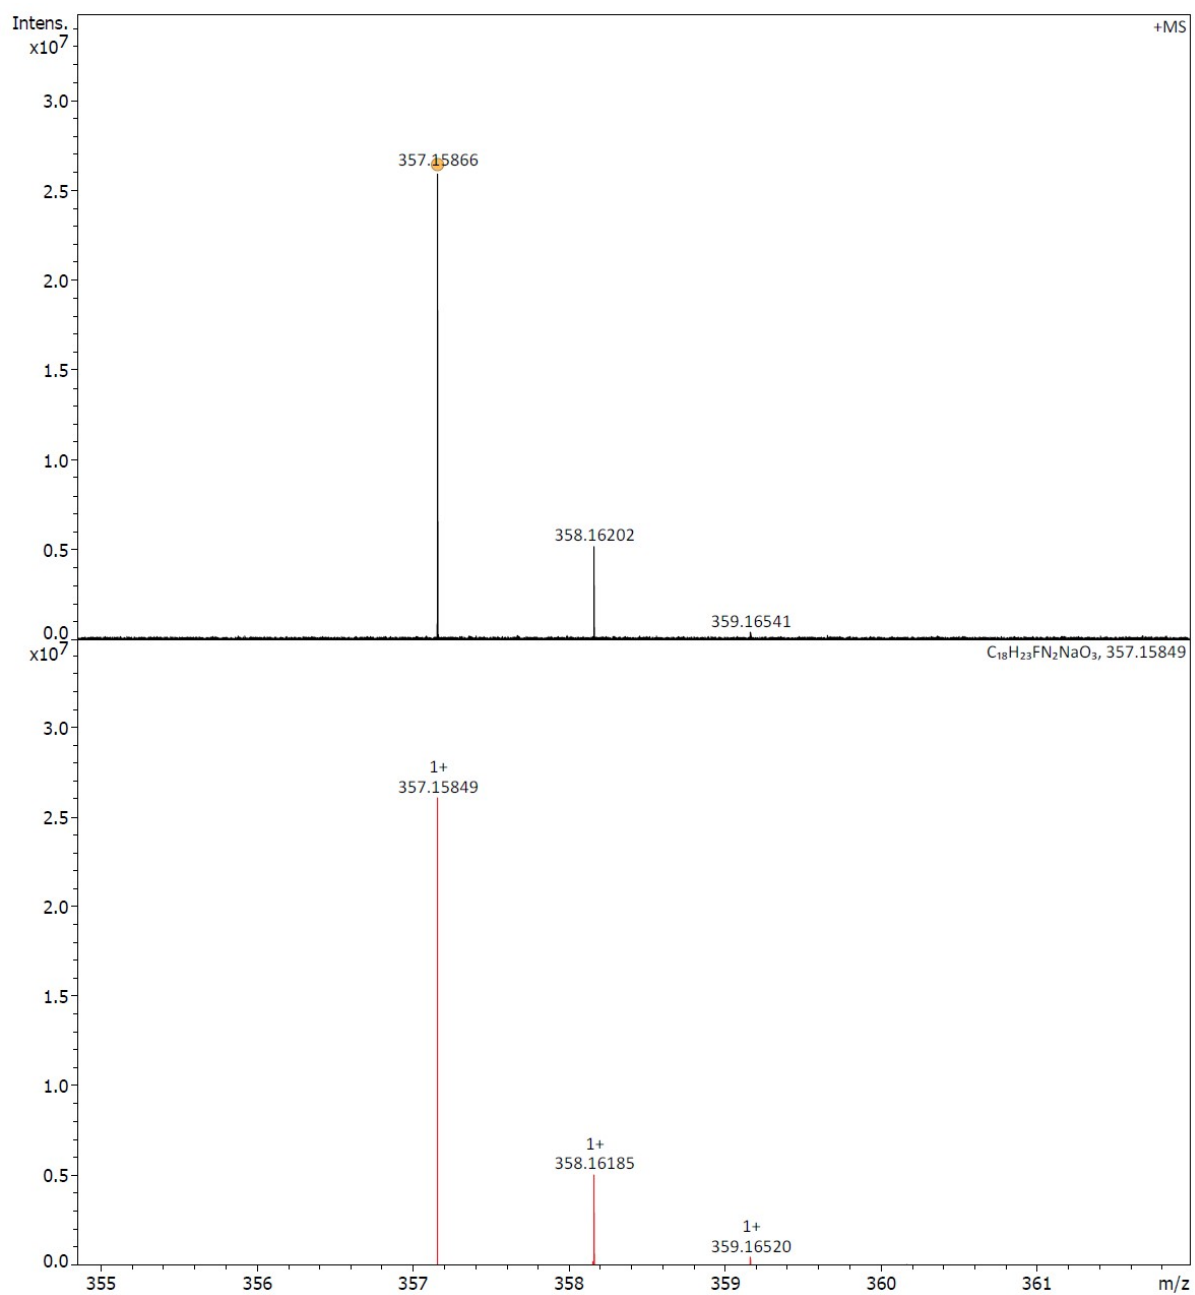

**Figure S58.** HRMS spectrum for methyl (1-(5-fluoropentyl)-1*H*-indole-3-carbonyl)-*D*-alaninate (*R*-ALA-5F-PICA, **18**).

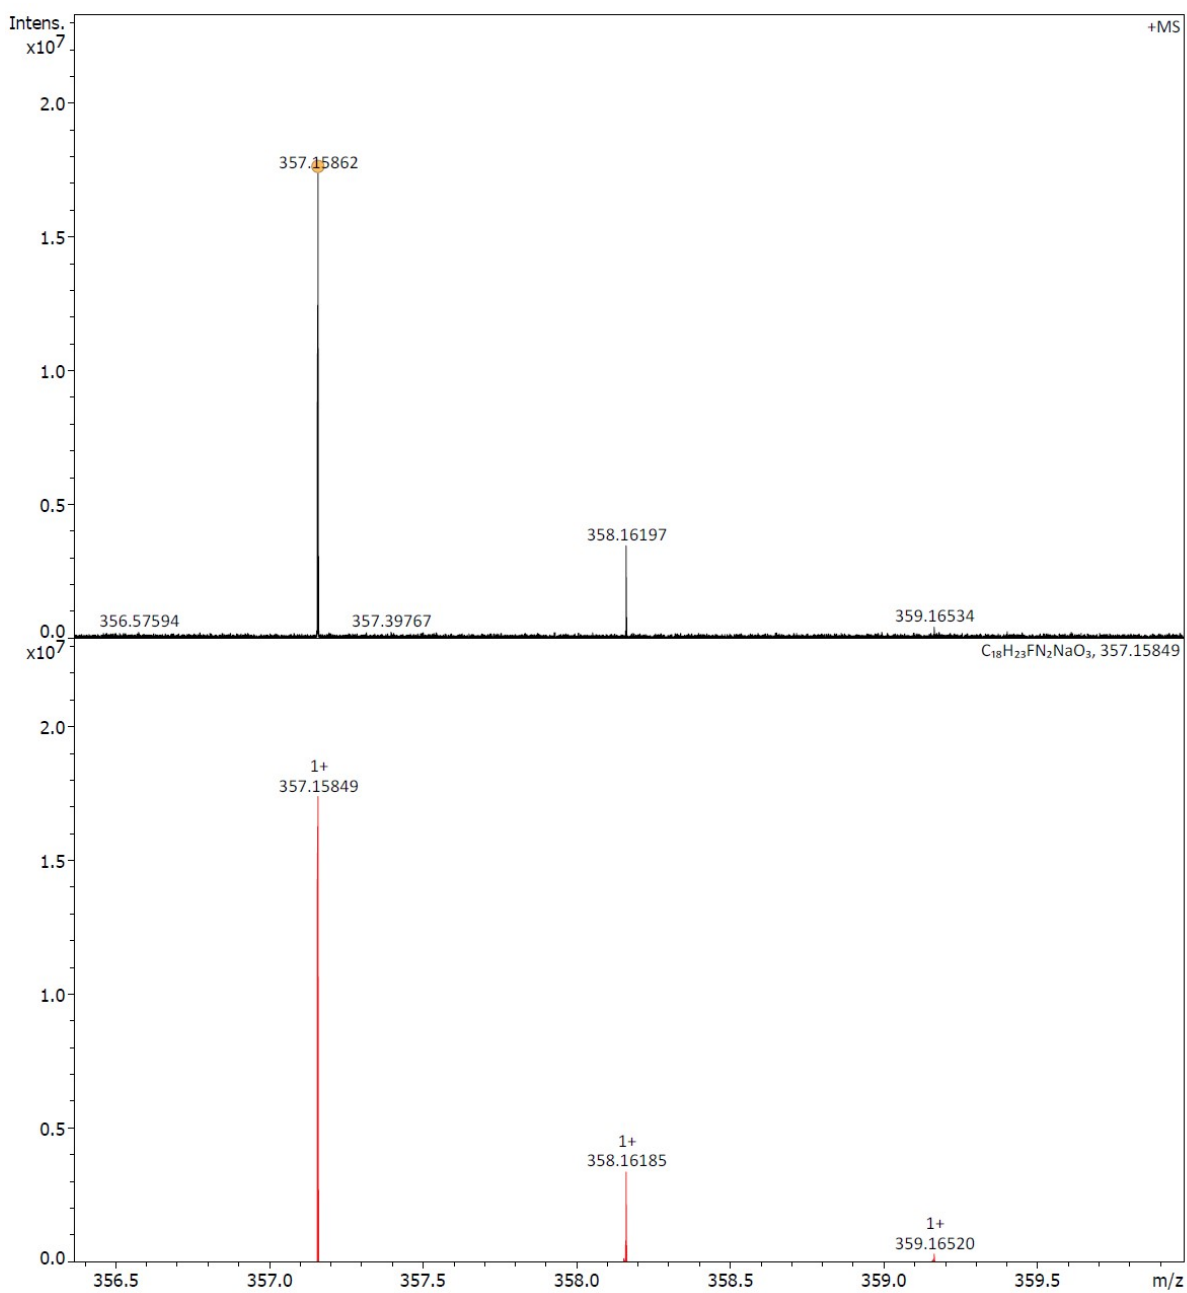

**Figure S59.** HRMS spectrum for methyl (1-(5-fluoropentyl)-1*H*-indole-3-carbonyl)-*R*-valinate (*R*-MMB-5F-PICA, **20**).

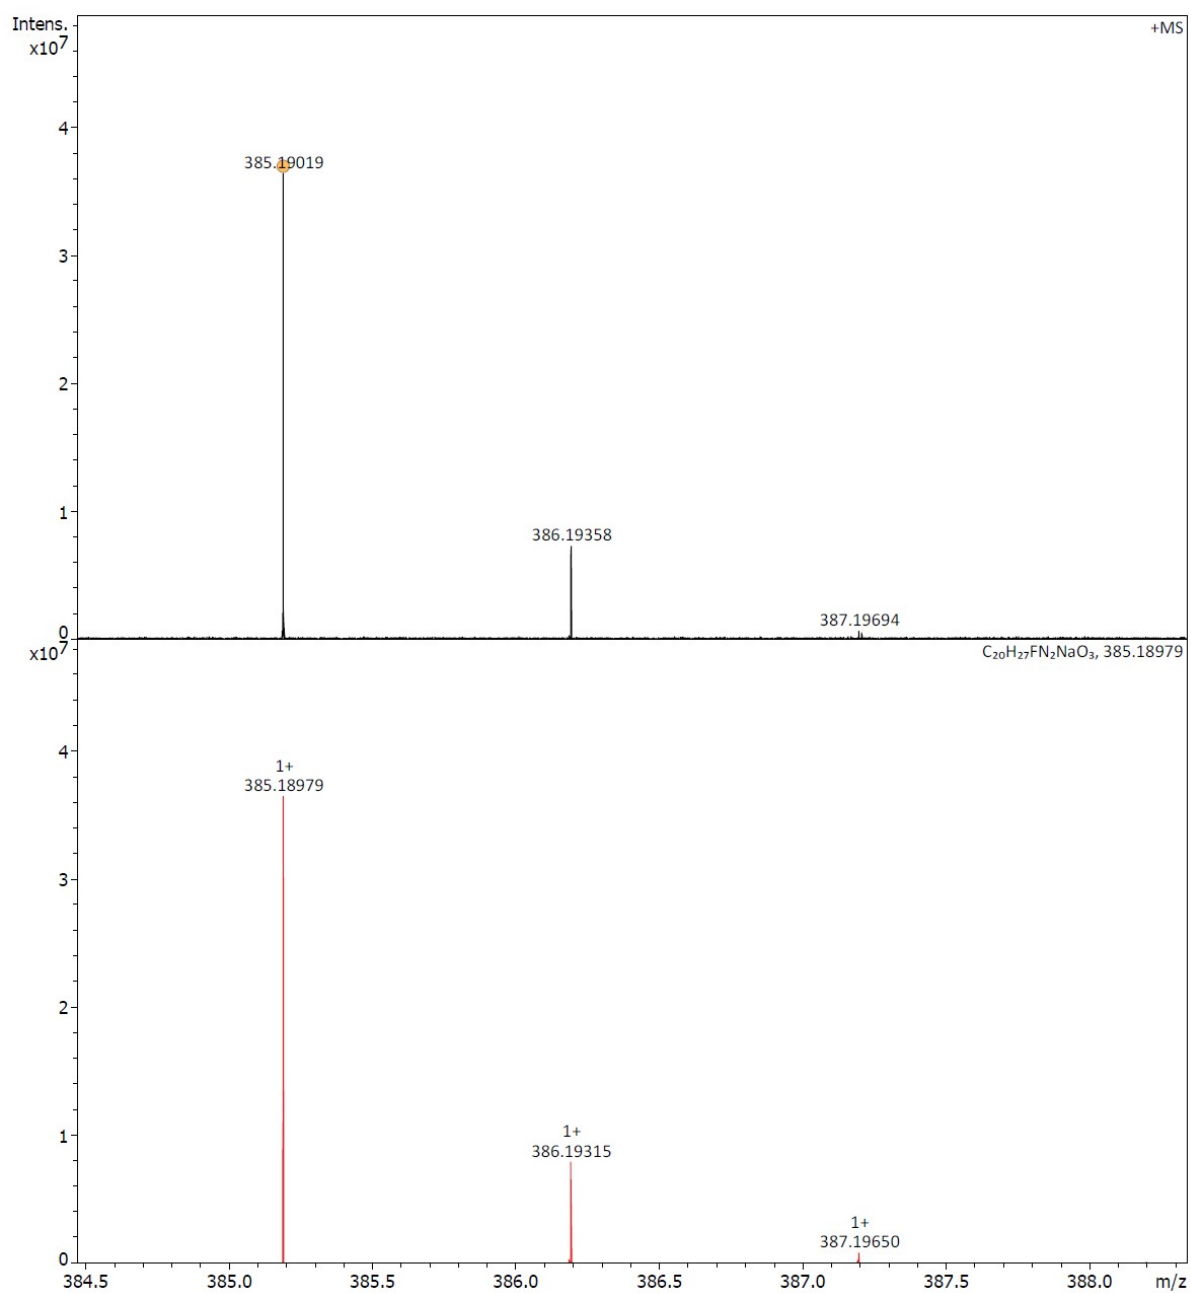

**Figure S60.** HRMS spectrum for methyl (1-(5-fluoropentyl)-1*H*-indole-3-carbonyl)-*S*-serinate (*S*-SER-5F-PICA, **21**).

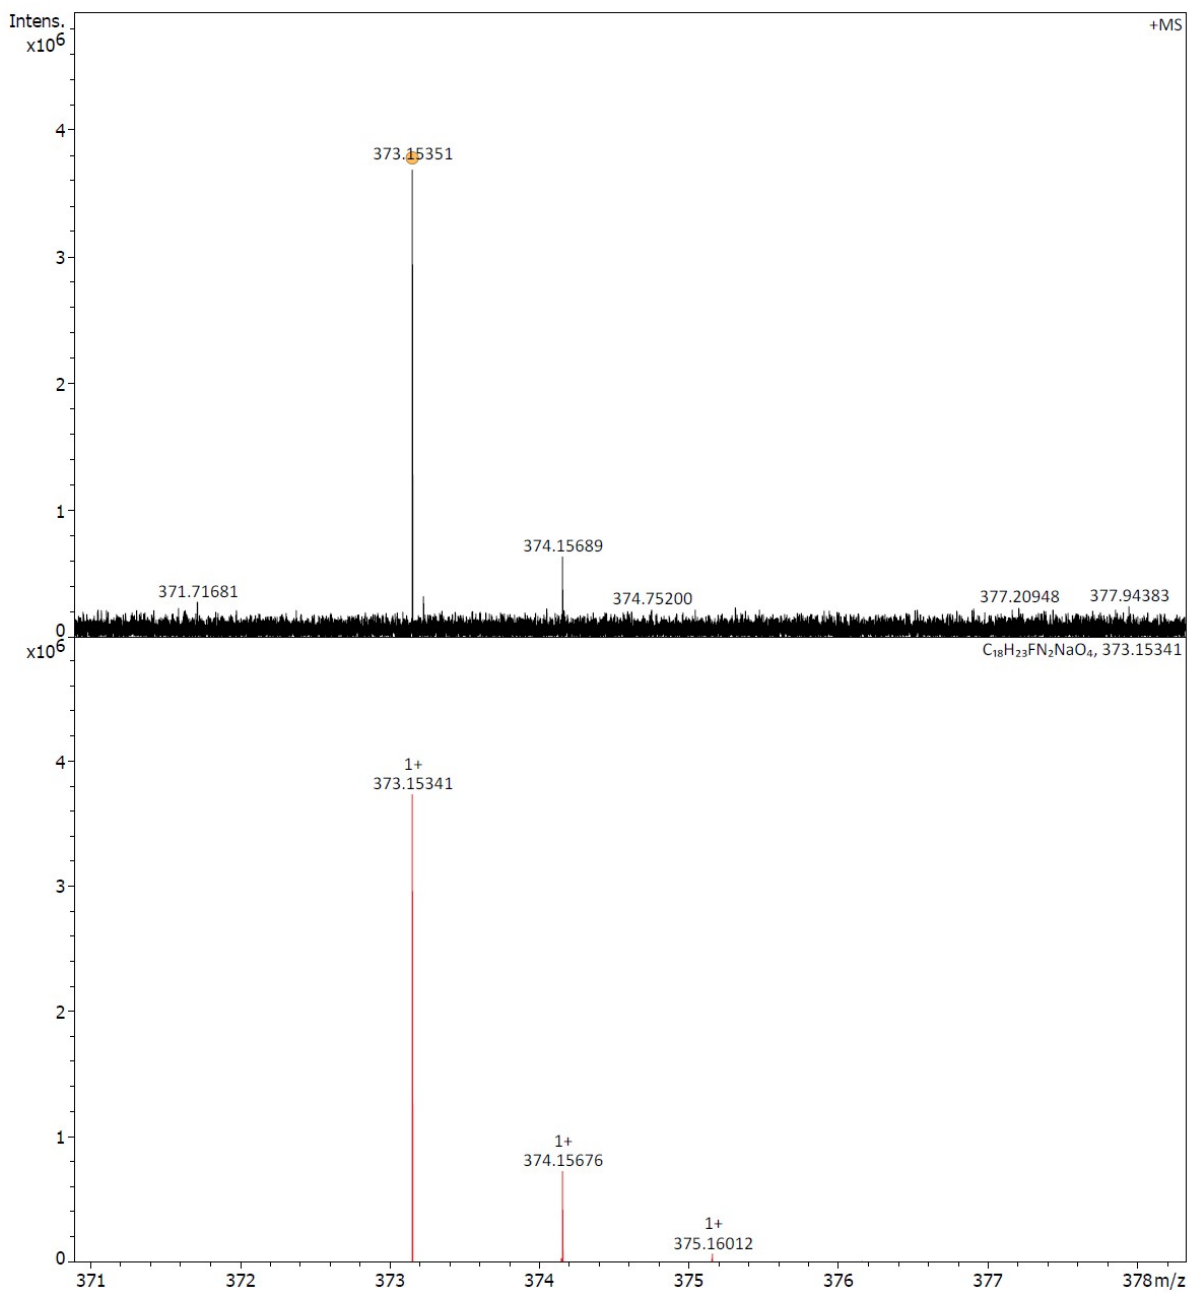

**Figure S61.** HRMS spectrum for methyl (1-(5-fluoropentyl)-1*H*-indole-3-carbonyl)-*R*-serinate (*R*-SER-5F-PICA, **22**).

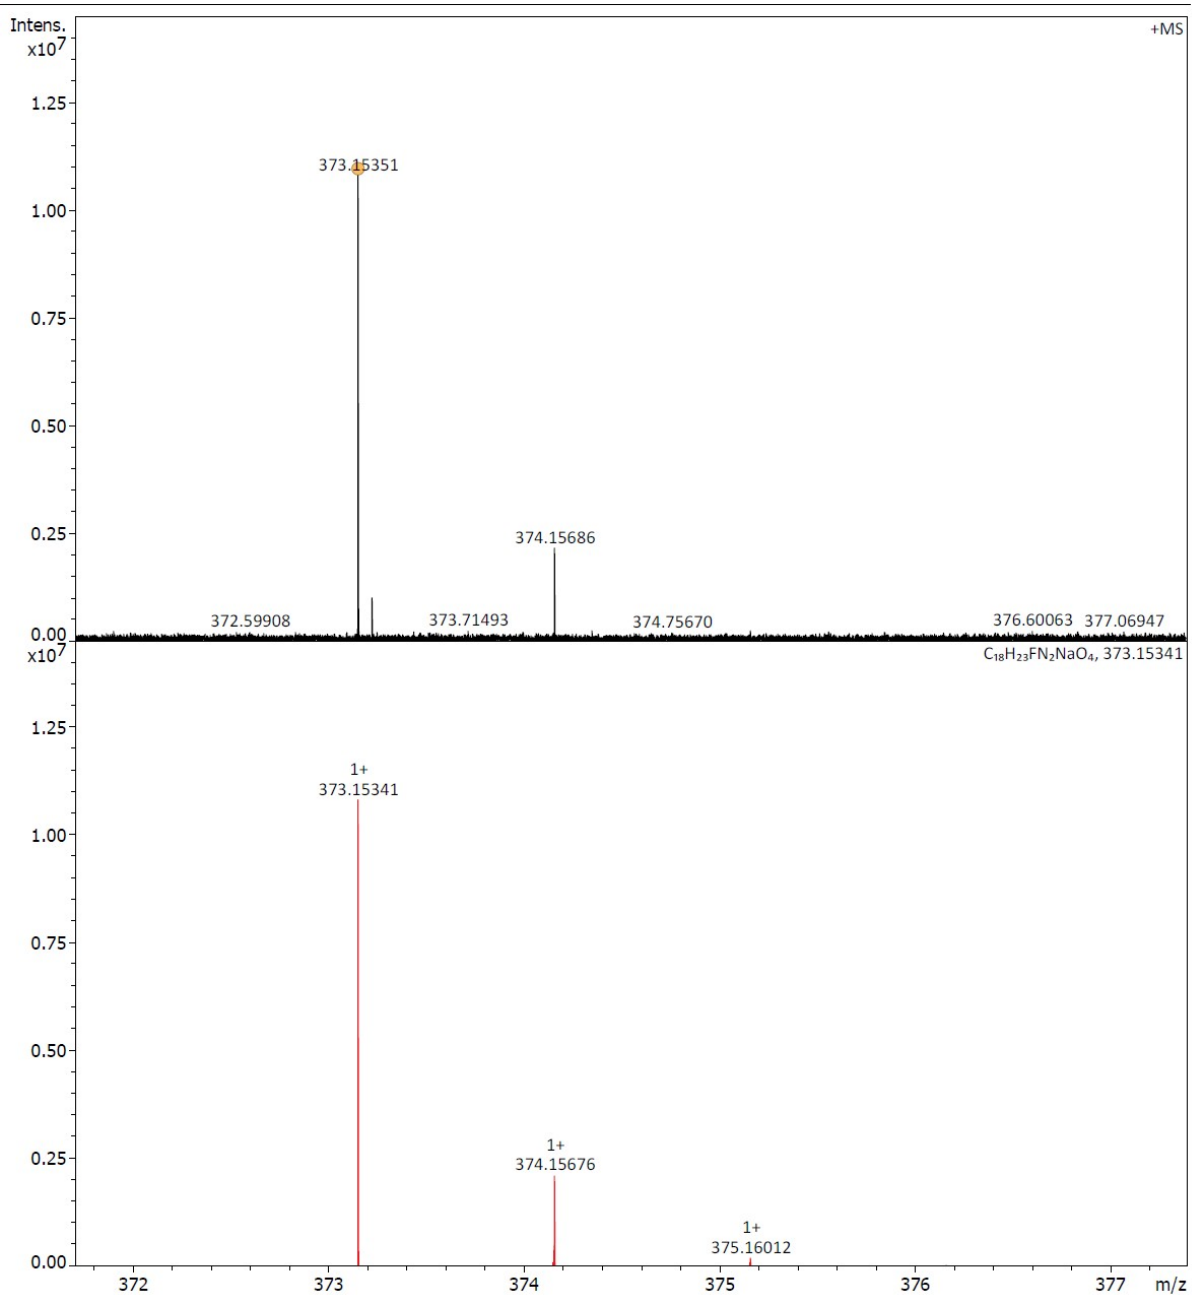

**Figure S62.** HRMS spectrum for methyl (1-(5-fluoropentyl)-1*H*-indole-3-carbonyl)-2*S*,3*R*-threoninate (2*S*,3*R*-THR-5F-PICA, **23**).

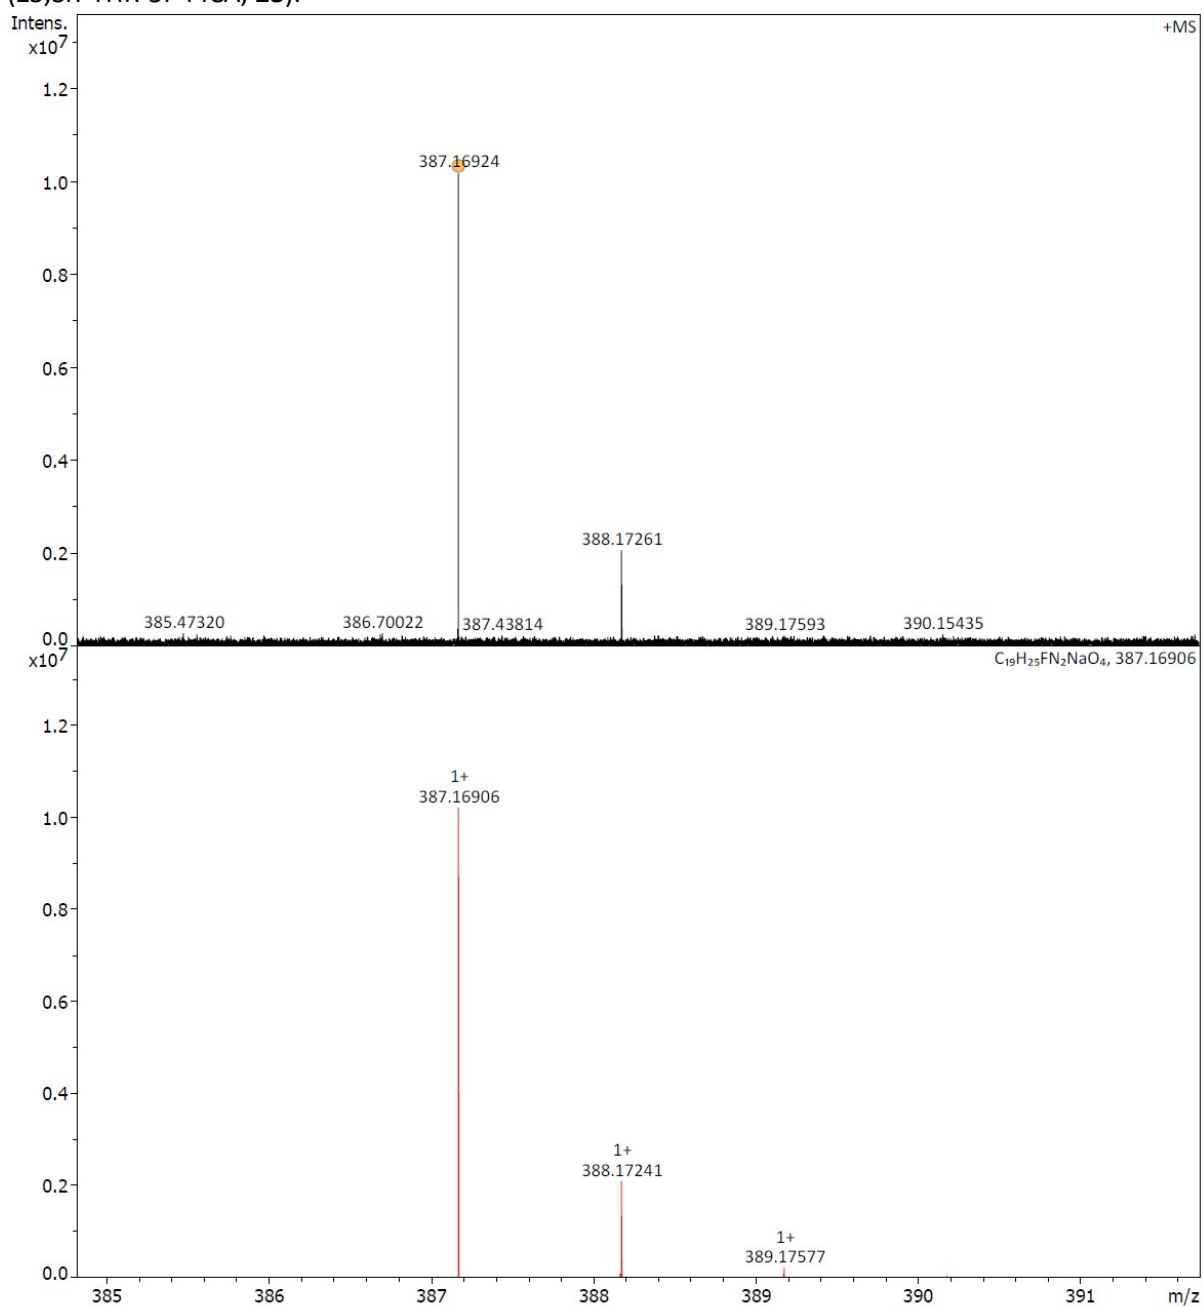

**Figure S63.** HRMS spectrum for methyl (1-(5-fluoropentyl)-1*H*-indole-3-carbonyl)-2*R*,3*S*-threoninate (2*R*,3*S*-THR-5F-PICA, **24**).

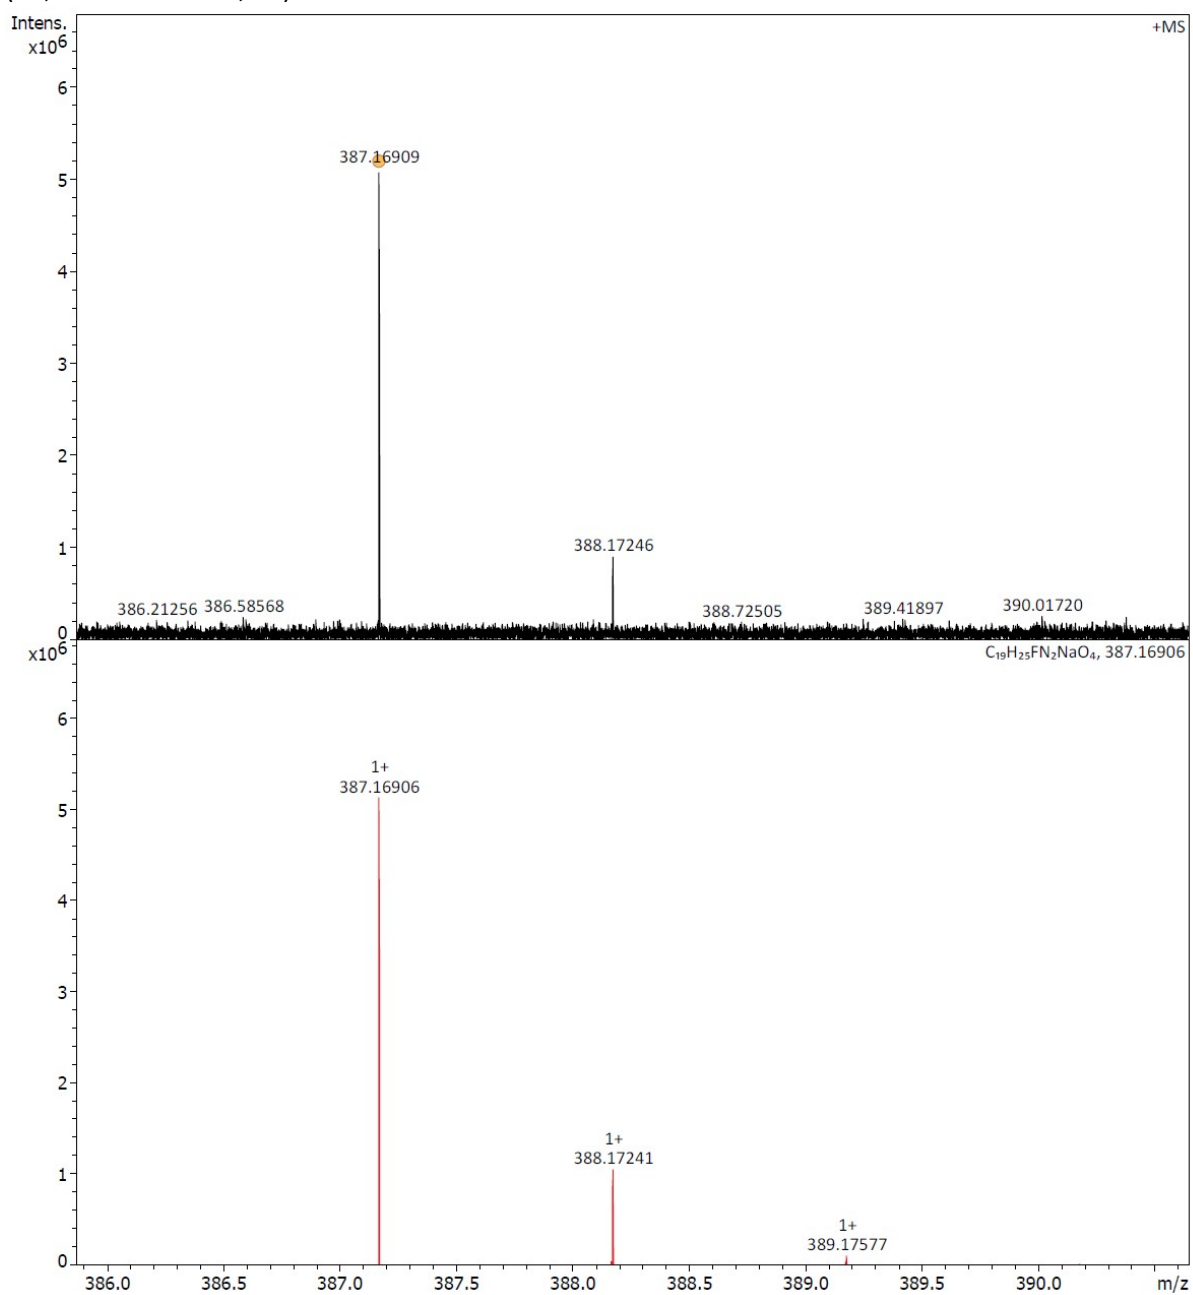



**Figure S64.** HRMS spectrum for methyl (1-(5-fluoropentyl)-1*H*-indole-3-carbonyl)-*S*-prolinate (*S*-PRO-5F-PICA, **25**).

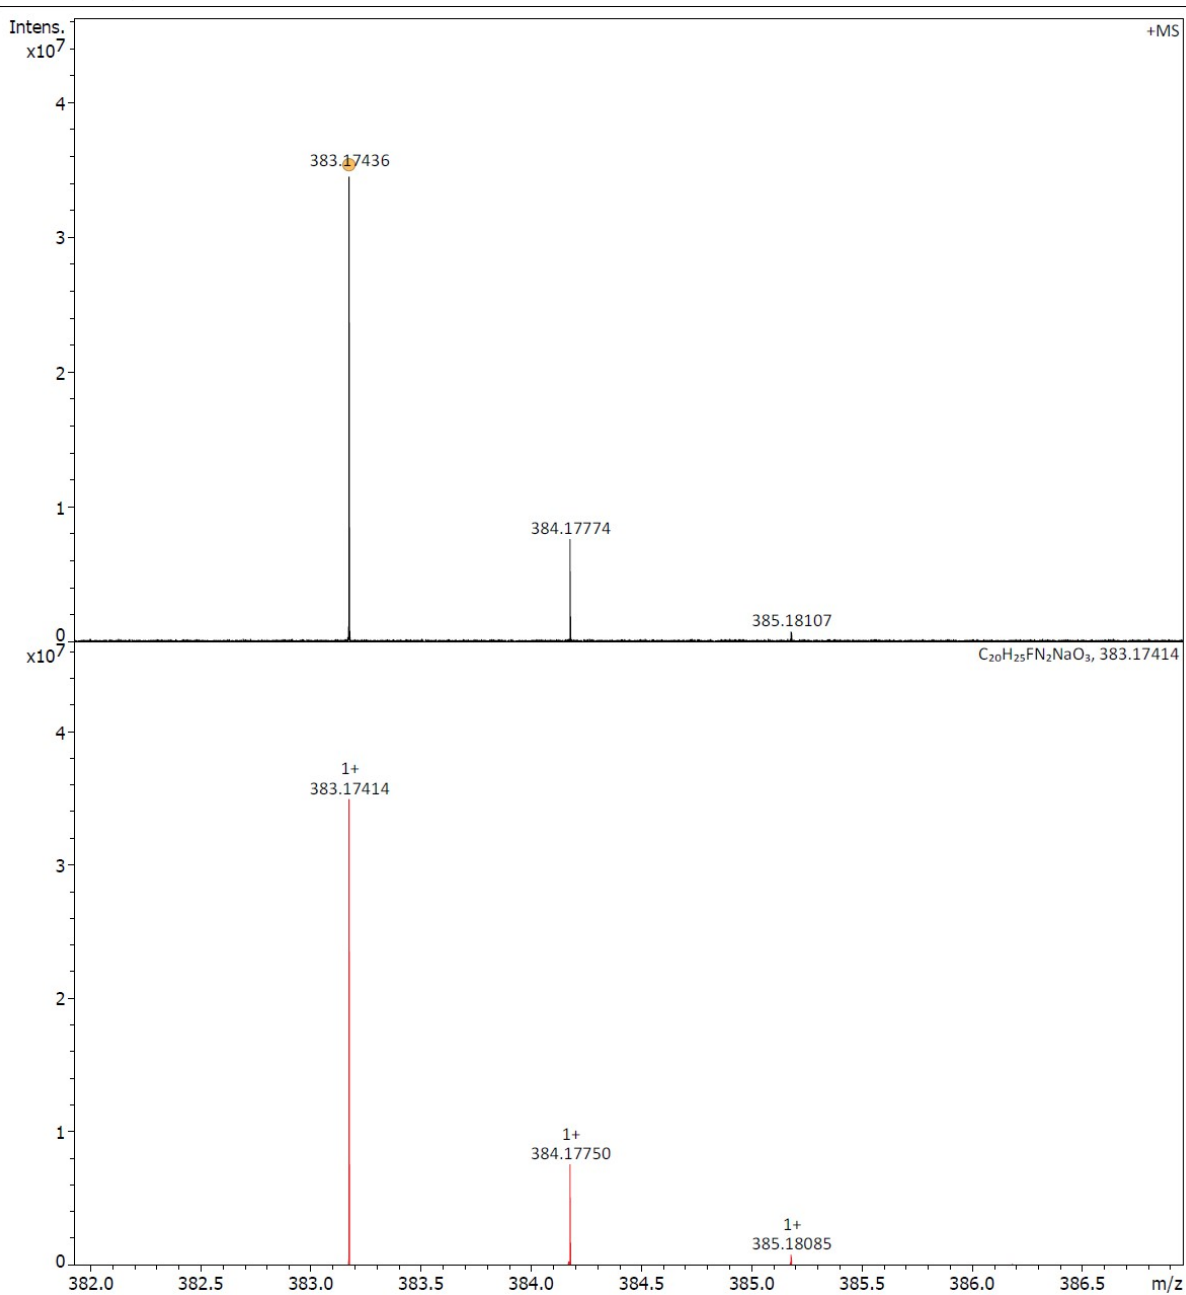

**Figure S65.** HRMS spectrum for methyl (1-(5-fluoropentyl)-1*H*-indole-3-carbonyl)-*R*-prolinate (*R*-PRO-5F-PICA, **26**).

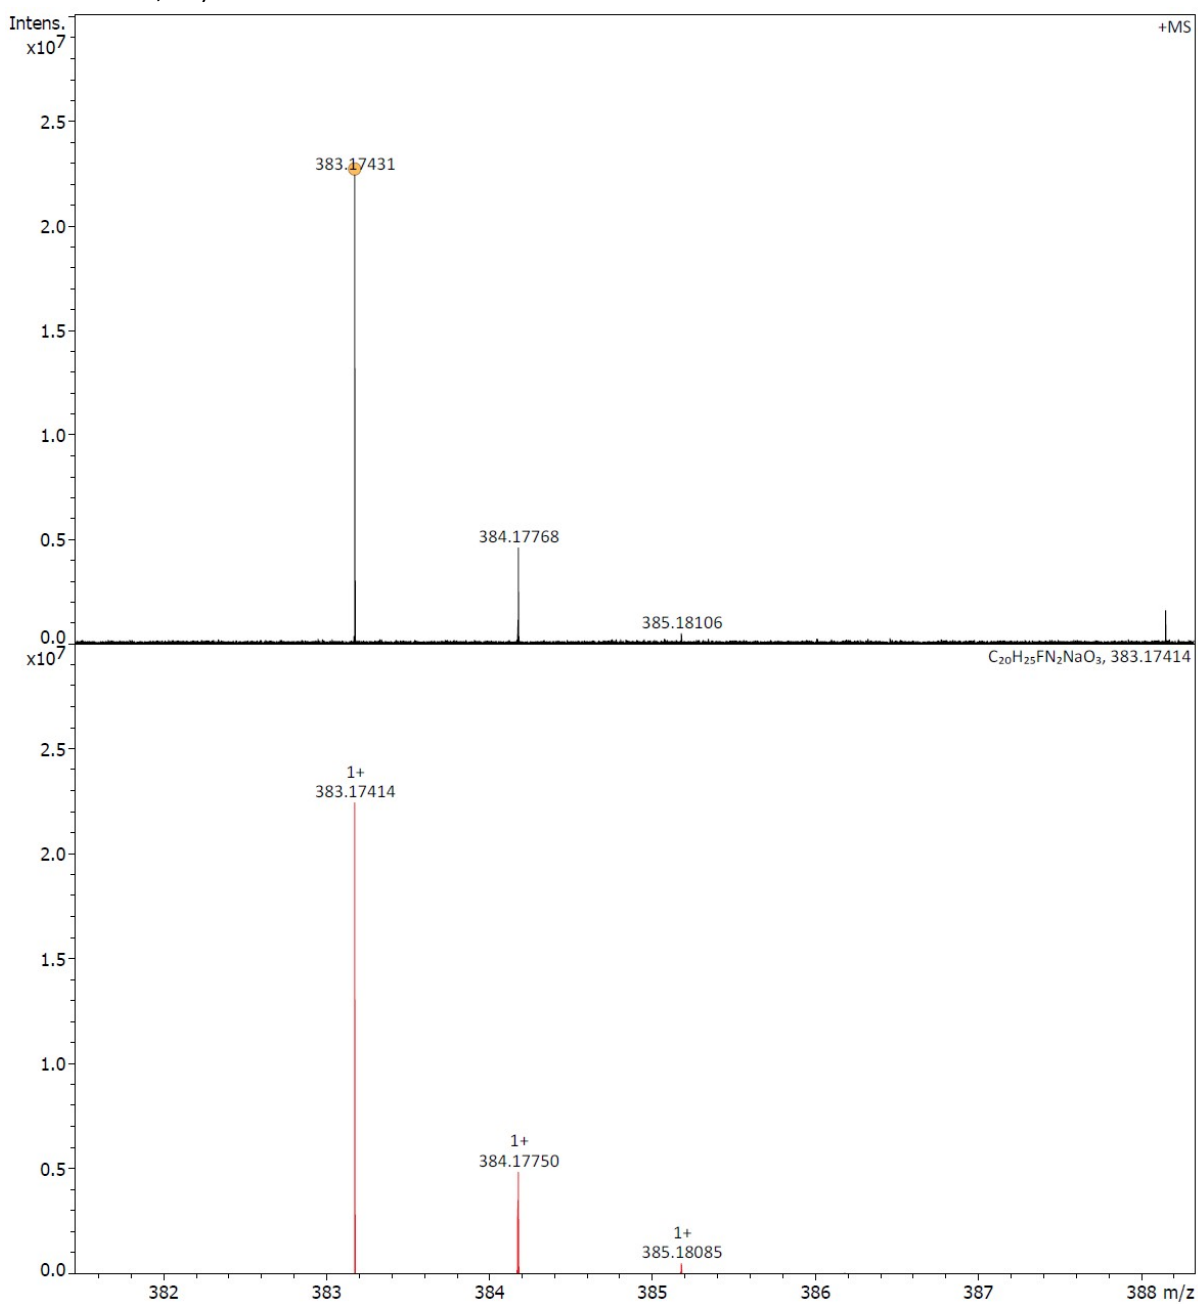

**Figure S66.** HRMS spectrum for methyl (1-(5-fluoropentyl)-1*H*-indole-3-carbonyl)-*S*-leucinate (*S*-LEU-5F-PICA, **27**).

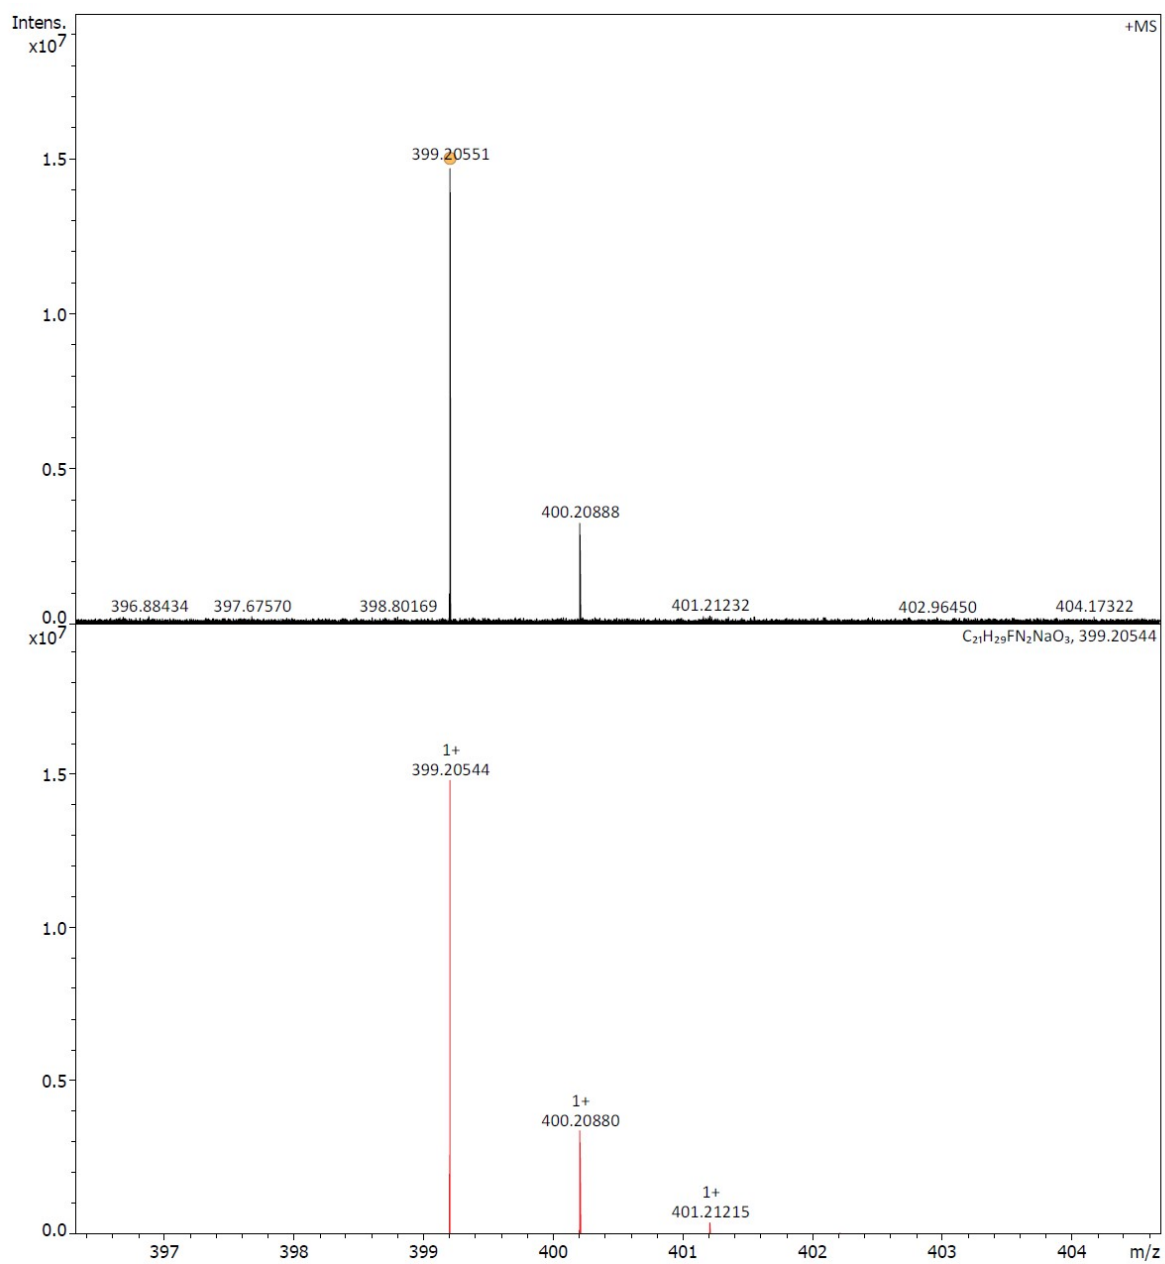

**Figure S67.** HRMS spectrum for methyl (1-(5-fluoropentyl)-1*H*-indole-3-carbonyl)-*R*-leucinate (*R*-LEU-5F-PICA, **28**).

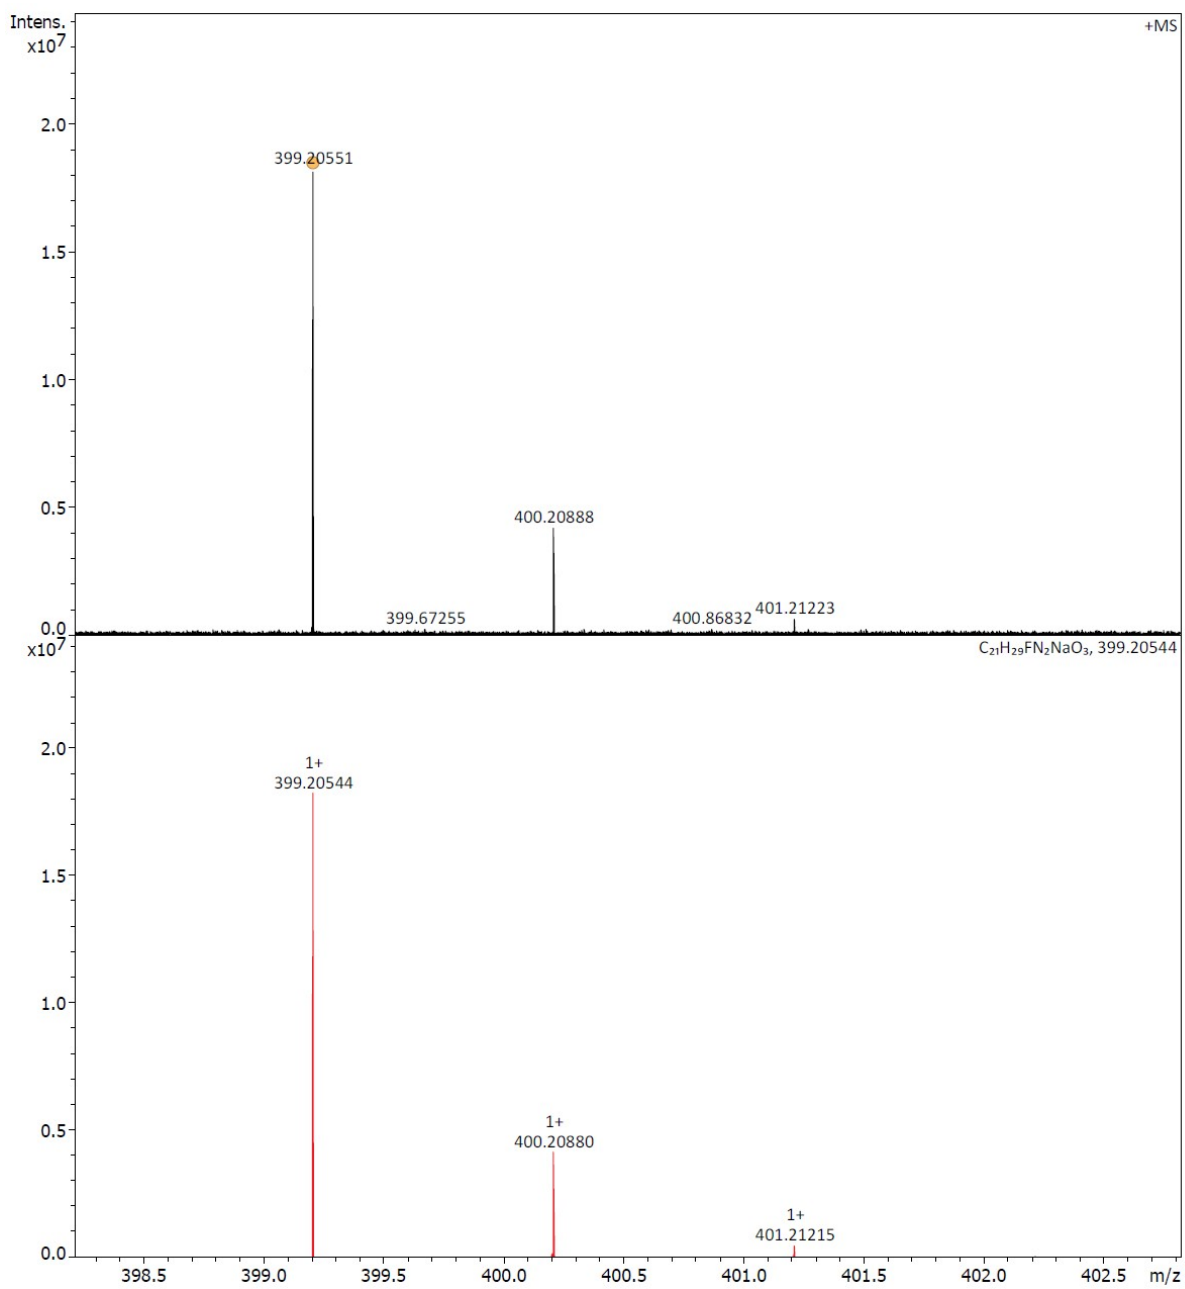

**Figure S68.** HRMS spectrum for methyl (1-(5-fluoropentyl)-1*H*-indole-3-carbonyl)-*S*-isoleucinate (*S*-ILE-5F-PICA, **29**).

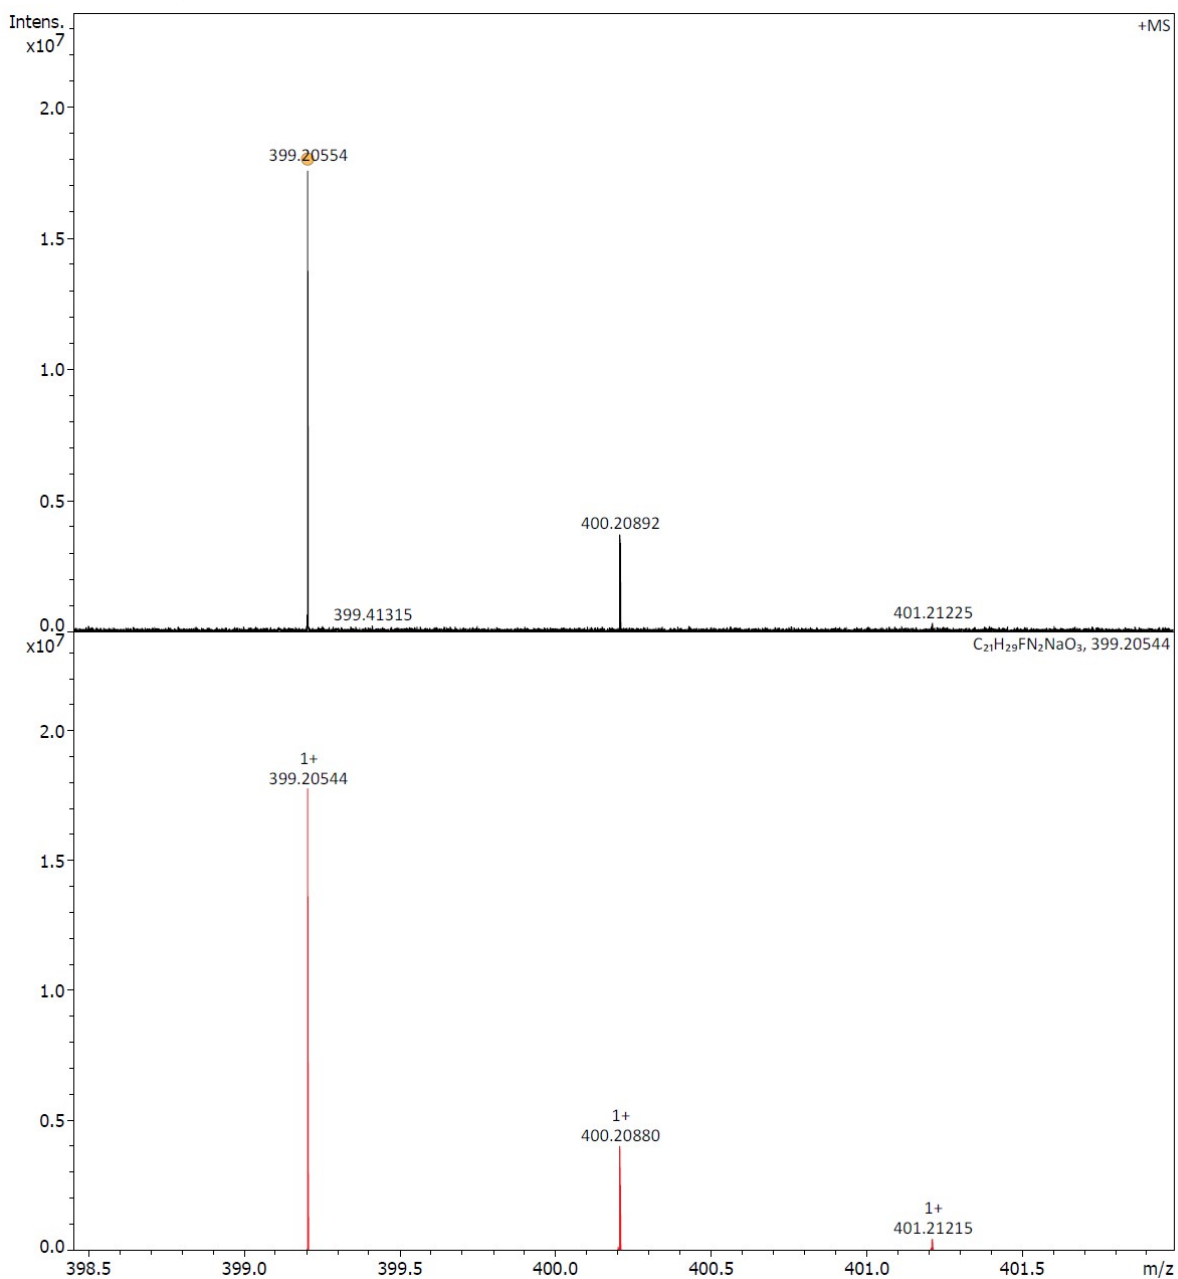

**Figure S69.** HRMS spectrum for methyl (1-(5-fluoropentyl)-1*H*-indole-3-carbonyl)-*R*-isoleucinate (*R*-ILE-5F-PICA, **30**).

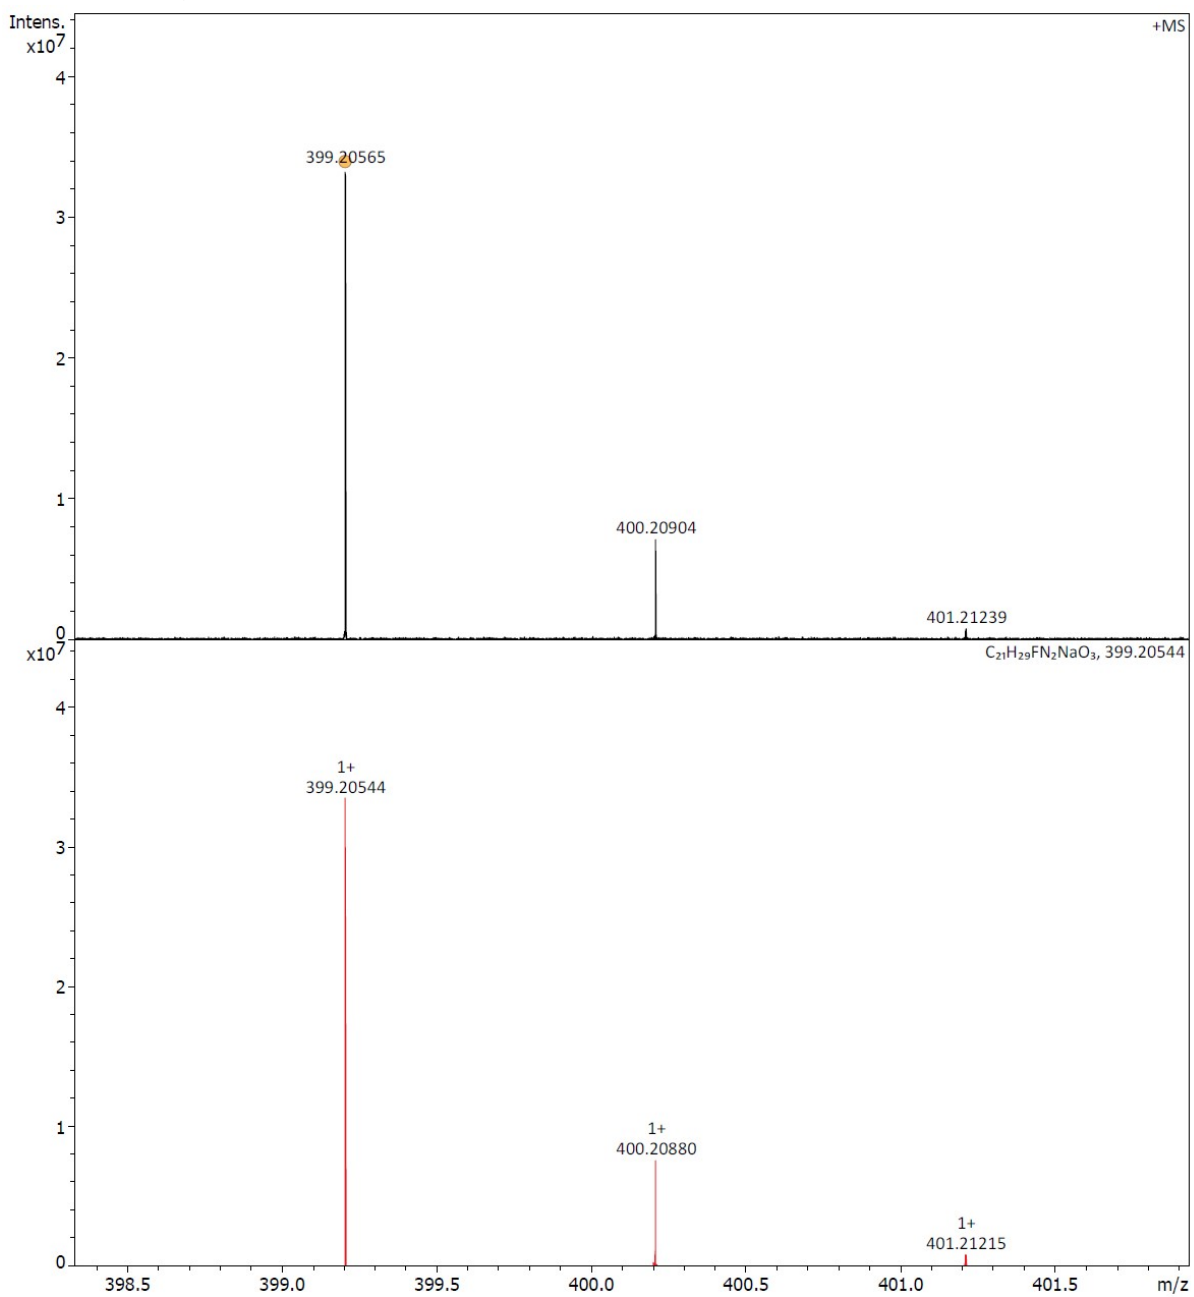

**Figure S70.** HRMS spectrum for methyl (*R*)-2-(1-(5-fluoropentyl)-1*H*-indole-3-carboxamido)-3,3-dimethylbutanoate (*R*-MDMB-5F-PICA, **32**).

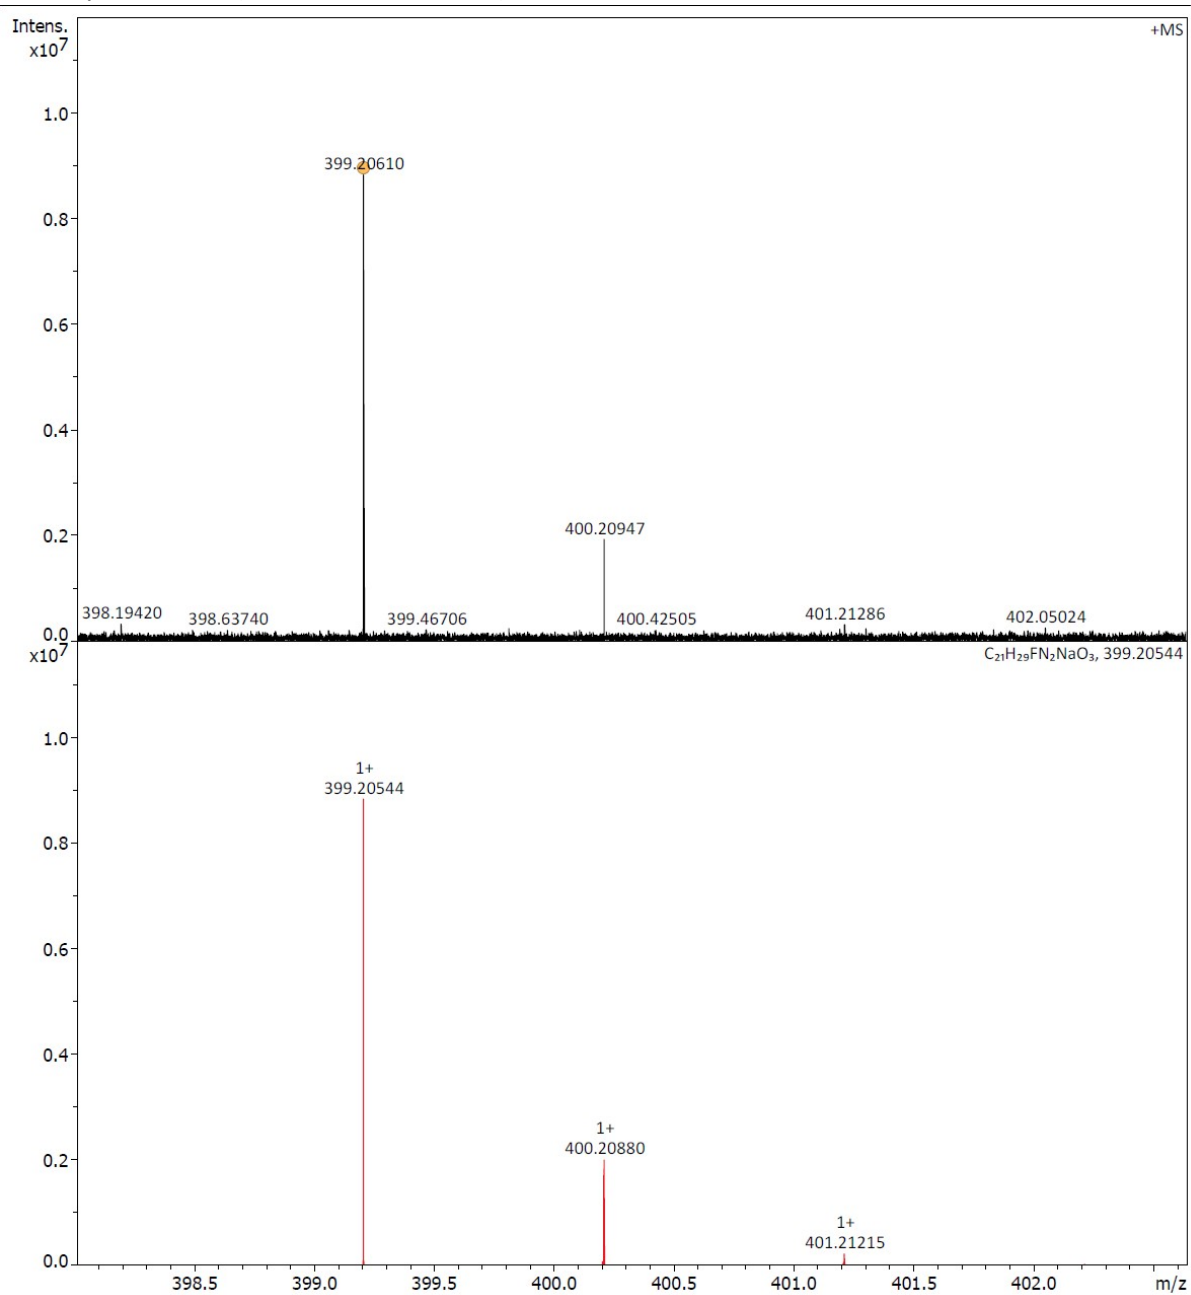

**Figure S71.** HRMS spectrum for methyl (1-(5-fluoropentyl)-1*H*-indole-3-carbonyl)-*R*-phenylalaninate (*R*-MPP-5F-PICA, **34**).

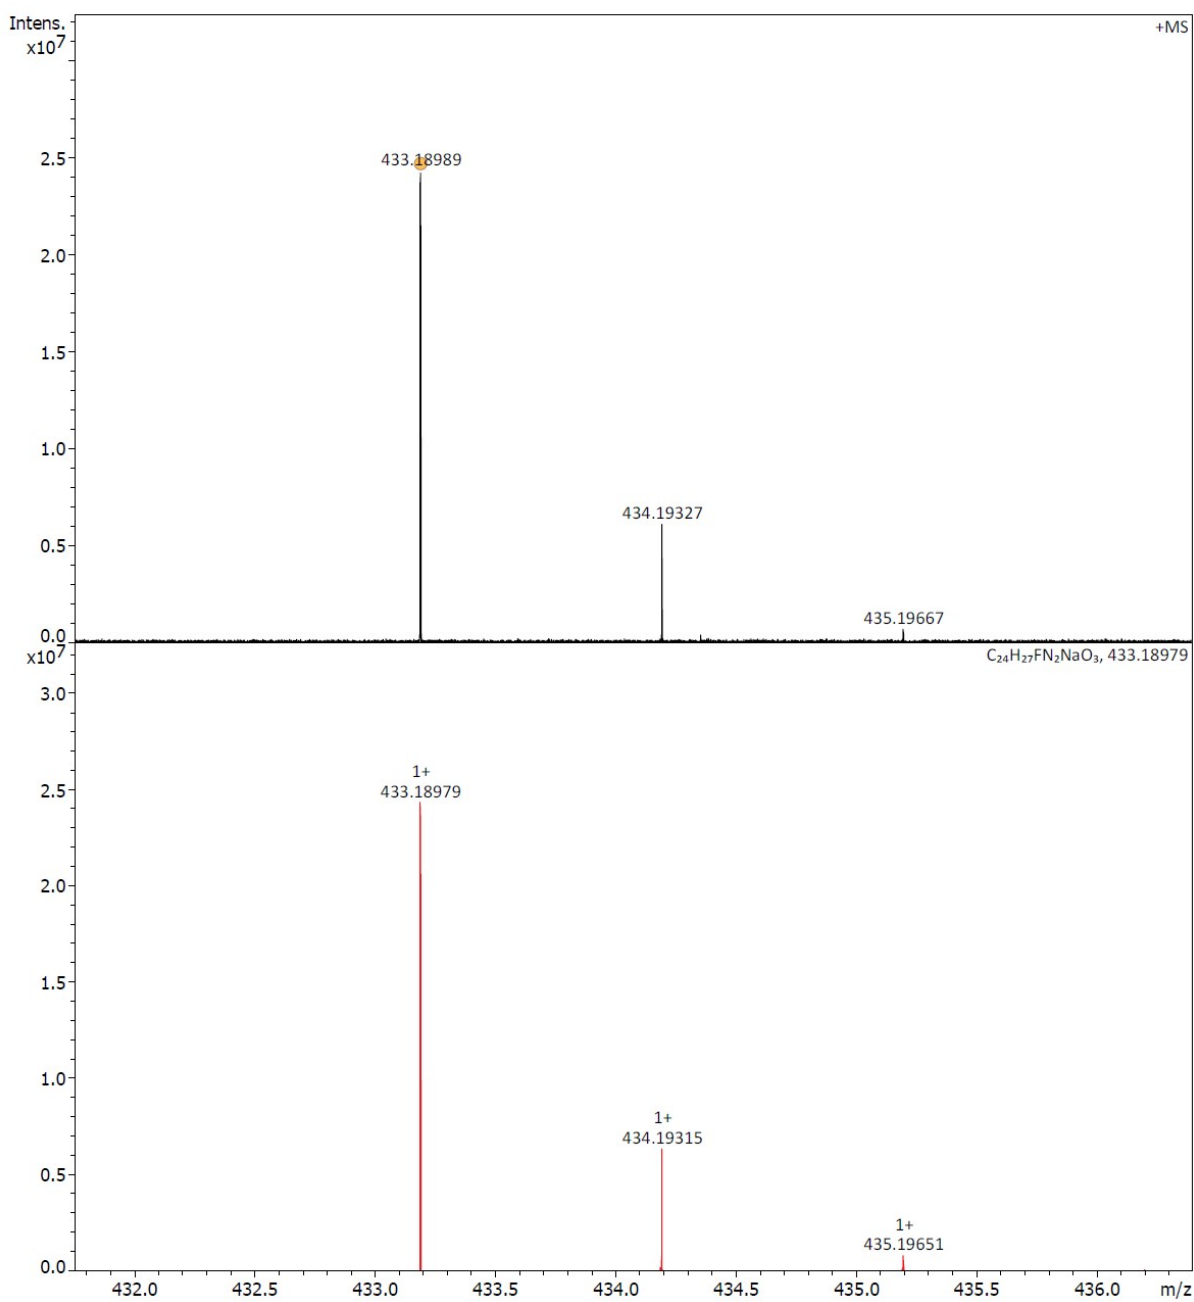



**Figure S72.** HRMS spectrum for methyl (1-(5-fluoropentyl)-1*H*-indole-3-carbonyl)-*S*-tyrosinate (*S*-TYR-5F-PICA, **35**).

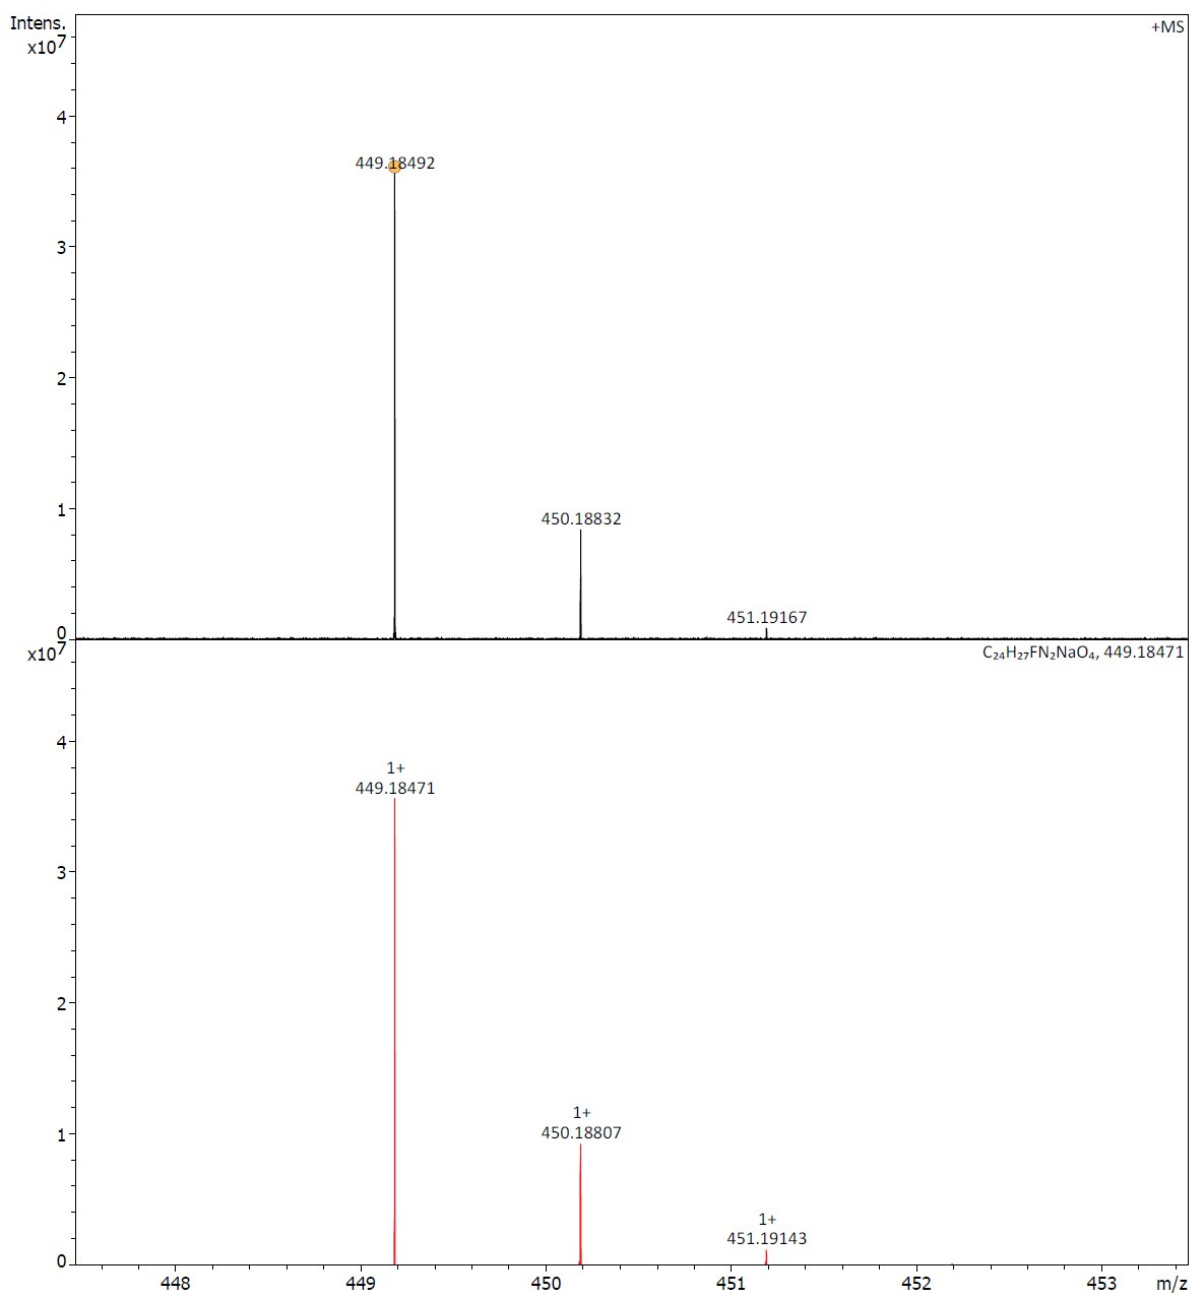

**Figure S73.** HRMS spectrum for methyl (1-(5-fluoropentyl)-1*H*-indole-3-carbonyl)-*R*-tyrosinate (*R*-TYR-5F-PICA, **36**).

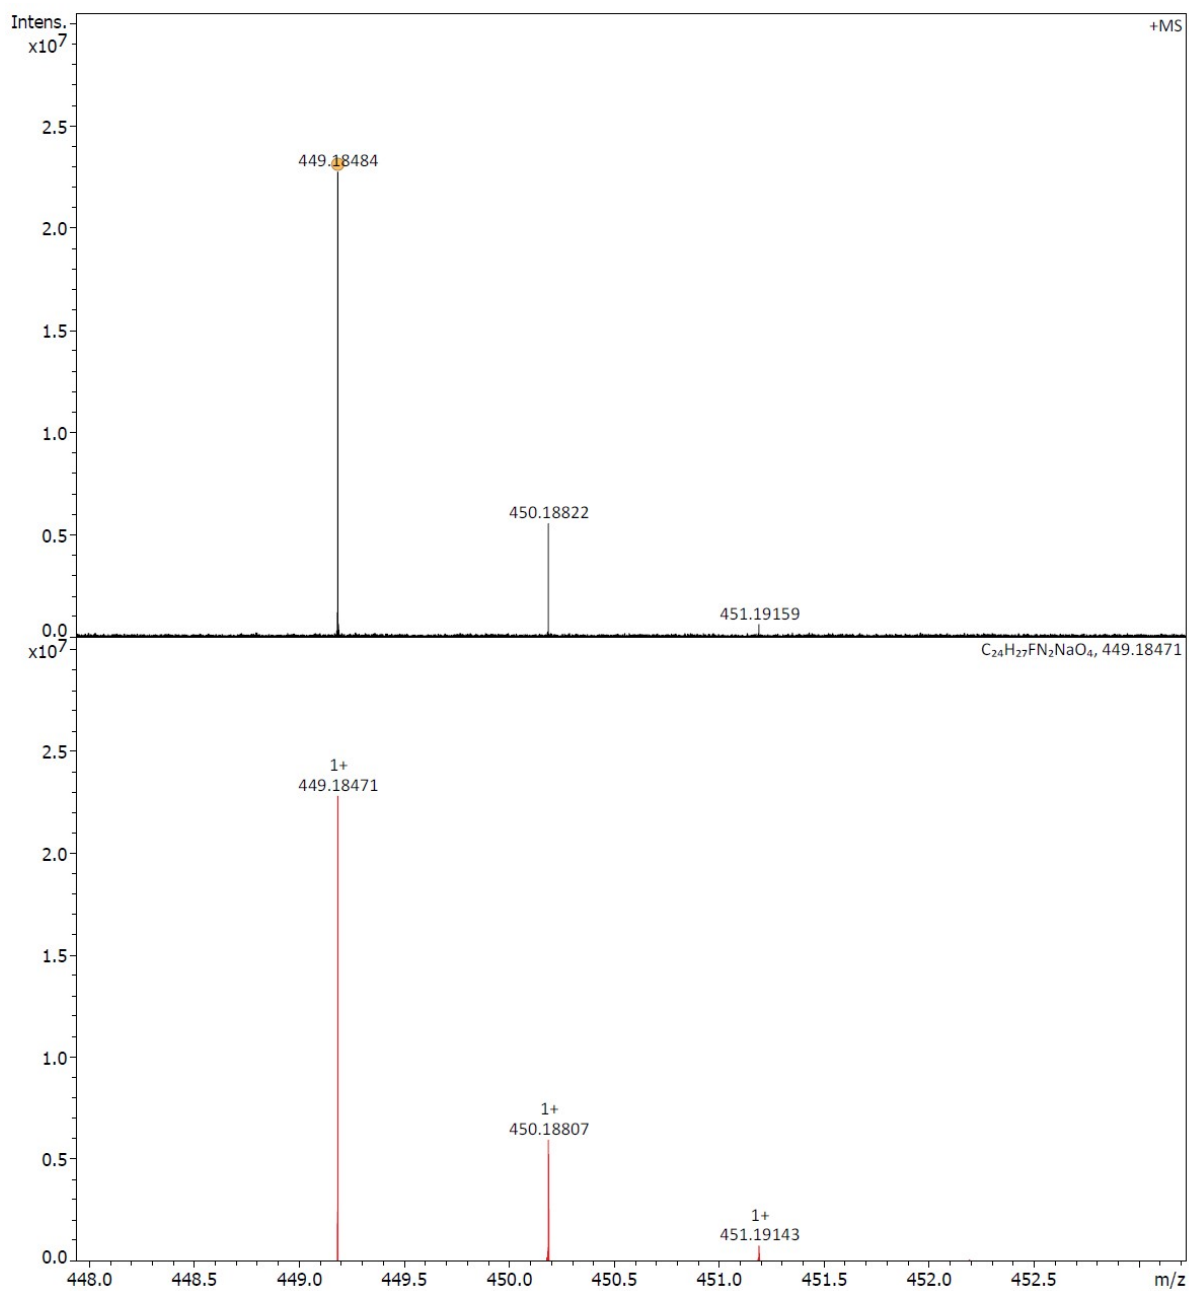

**Figure S74.** HRMS spectrum for methyl (1-(5-fluoropentyl)-1*H*-indole-3-carbonyl)-*S*-tryptophanate (*S*-TRP-5F-PICA, **37**).

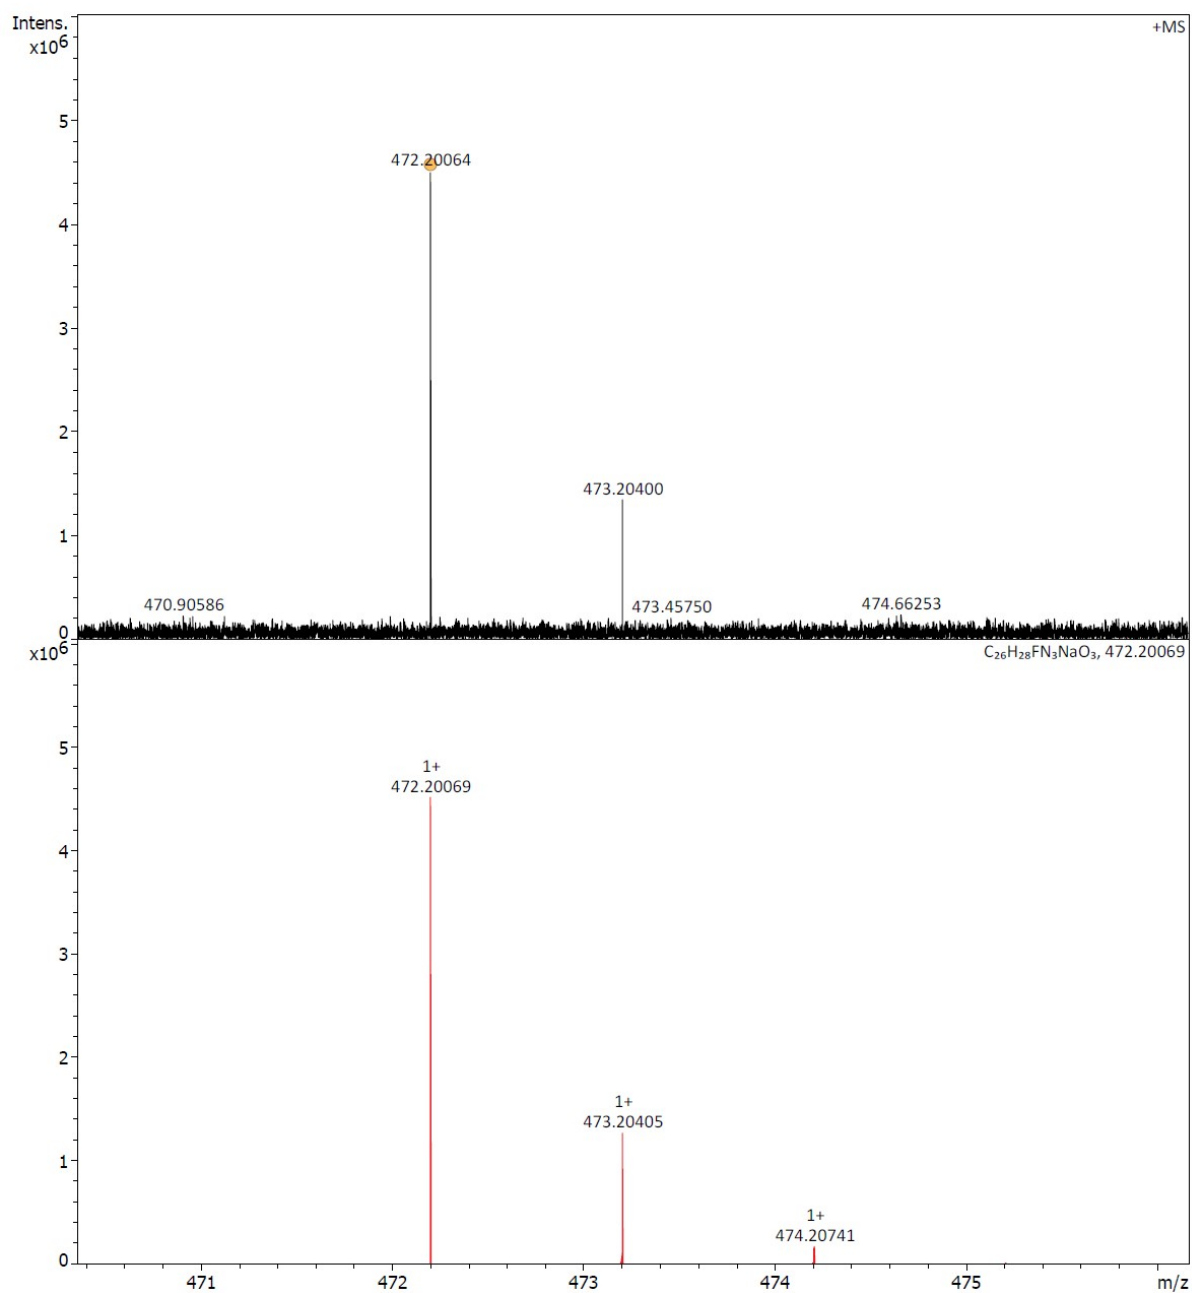

**Figure S75.** HRMS spectrum for methyl (1-(5-fluoropentyl)-1*H*-indole-3-carbonyl)-*R*-tryptophanate (*R*-TRP-5F-PICA, **38**).

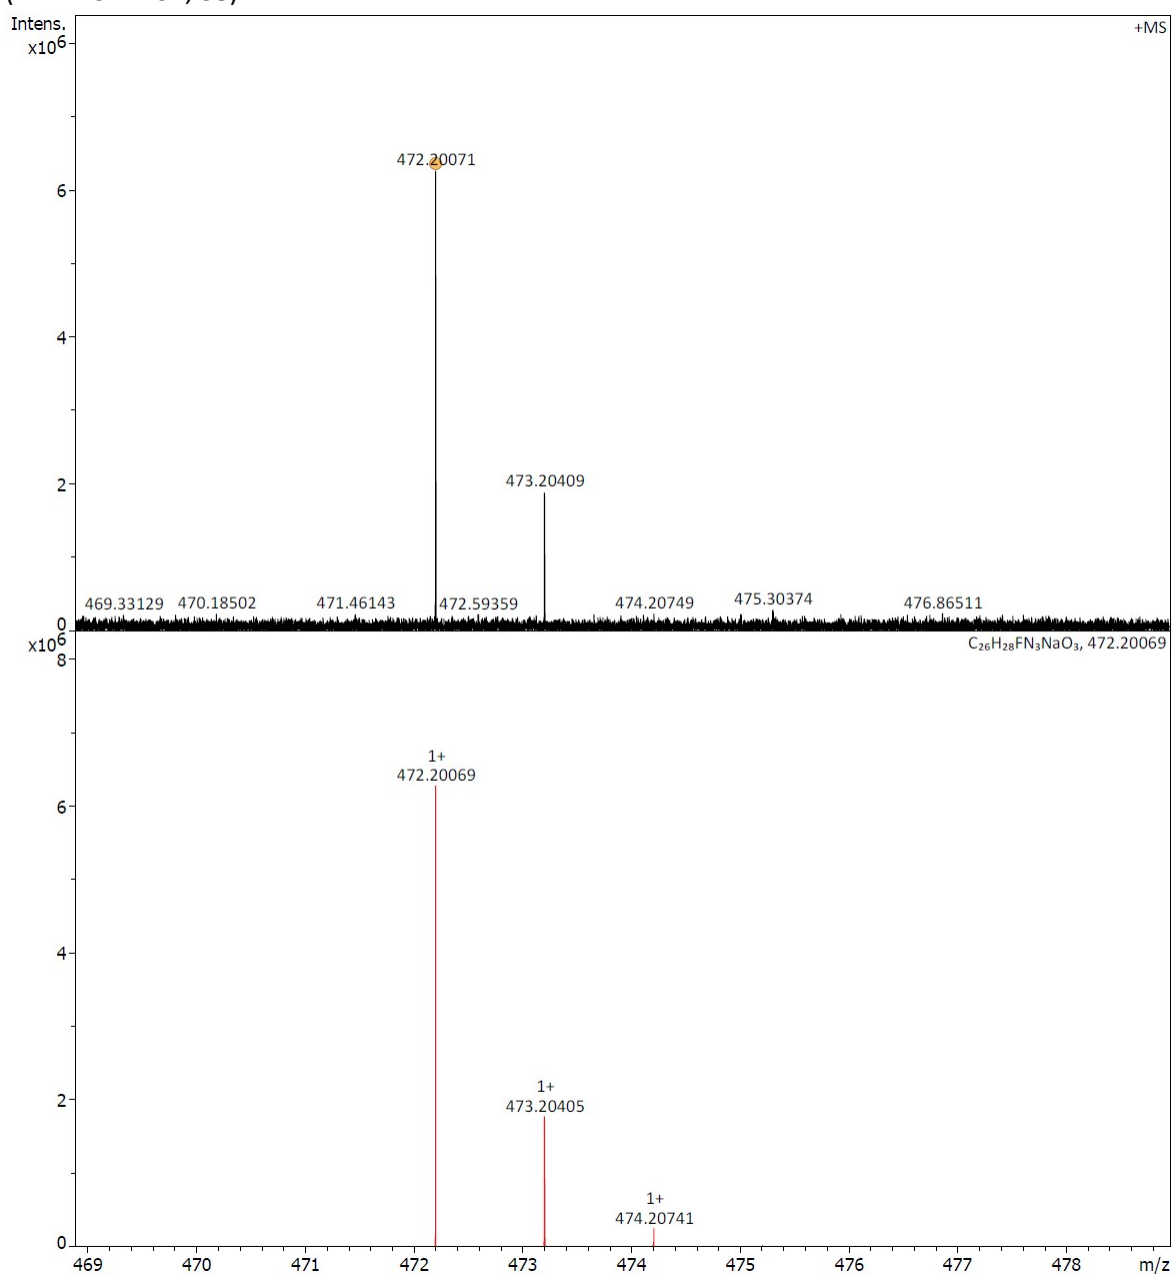

**Figure S76.** HRMS spectrum for methyl (1-(5-fluoropentyl)-1*H*-indole-3-carbonyl)-*S*-lysinate (*S*-LYS-5F-PICA **39**).

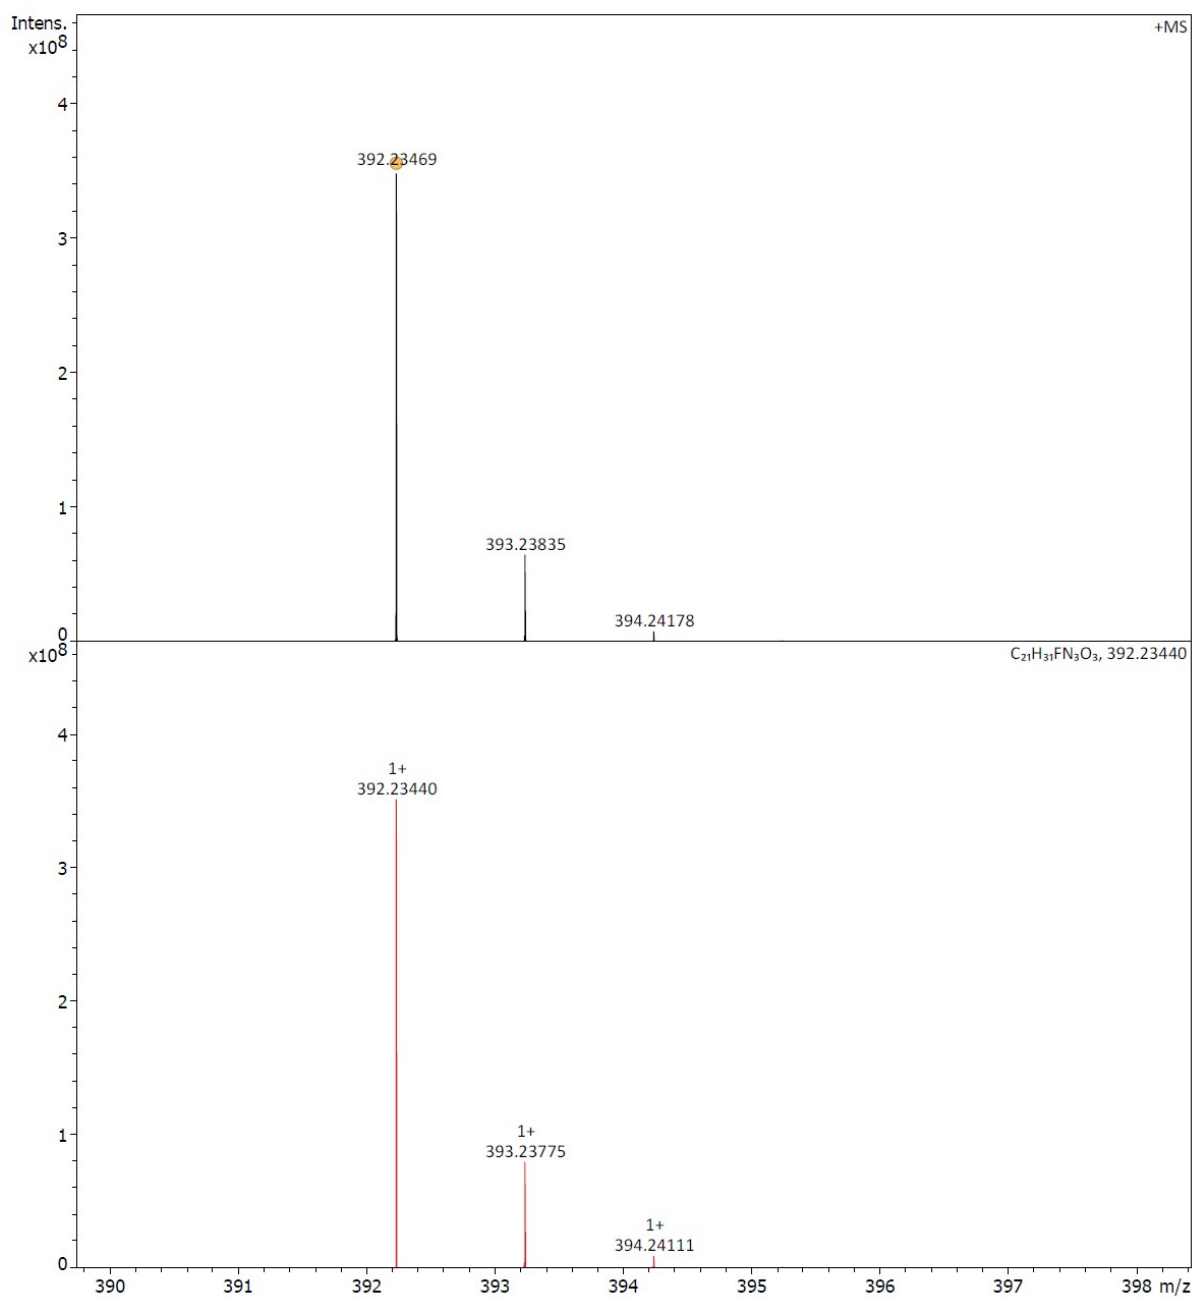

**Figure S77.** HRMS spectrum for methyl (1-(5-fluoropentyl)-1*H*-indole-3-carbonyl)-*R*-lysinate (*R*-LYS-5F-PICA, **40**).

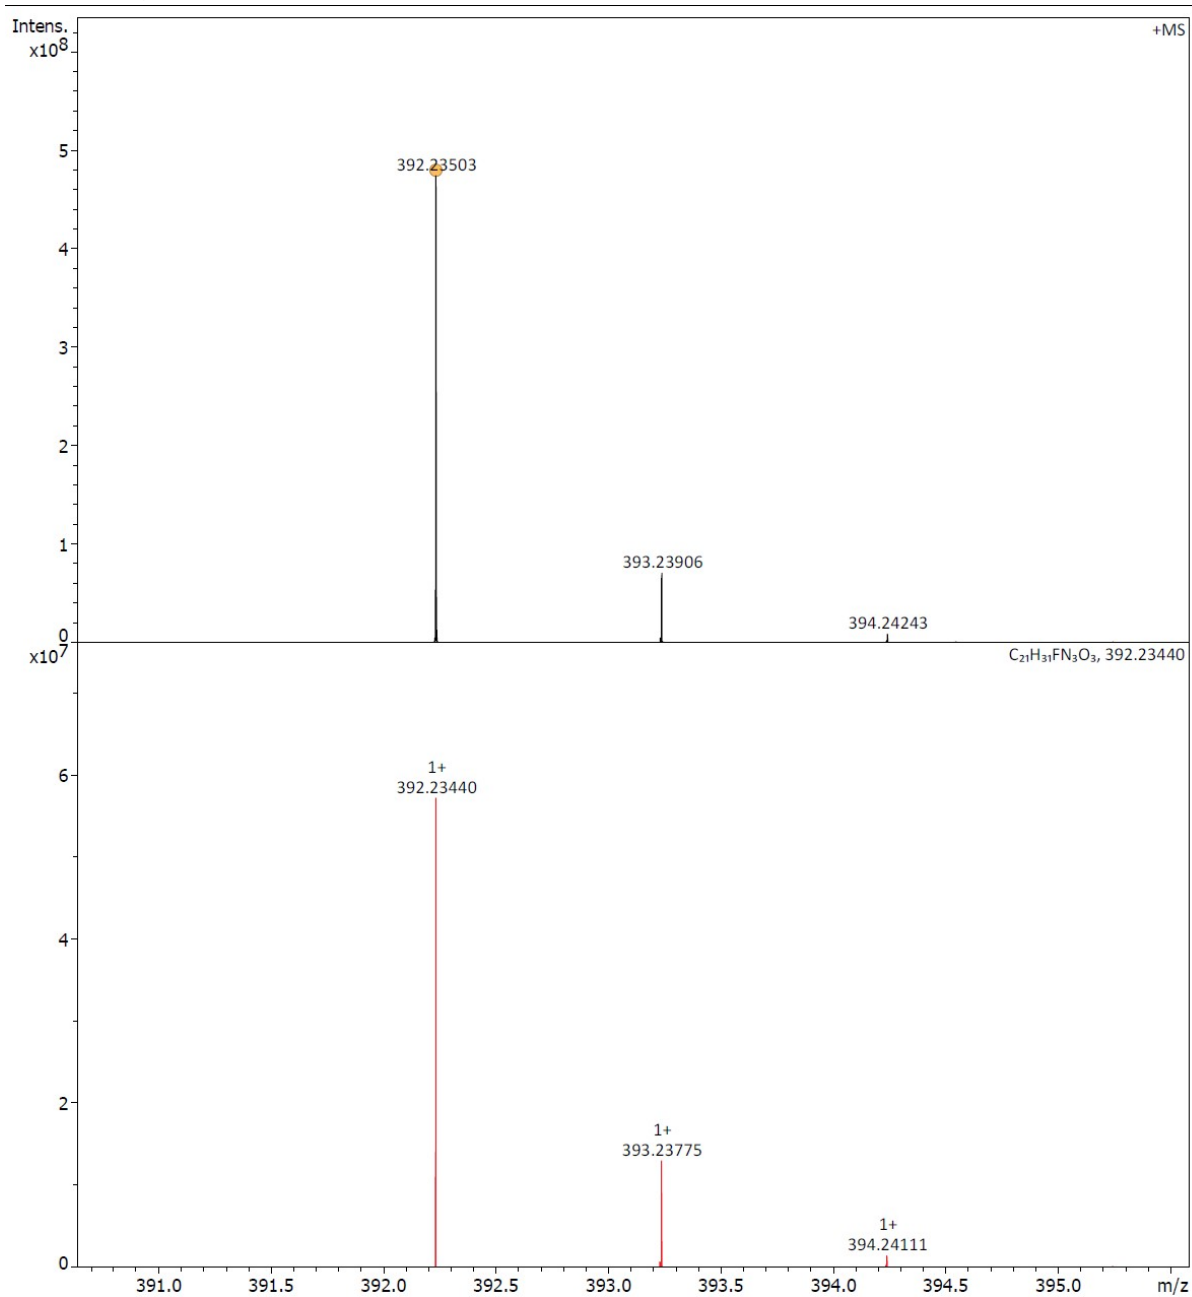

**Figure S78.** HRMS spectrum for methyl (1-(5-fluoropentyl)-1*H*-indole-3-carbonyl)-*S*-methioninate (*S*-MET-5F-PICA, **41**).

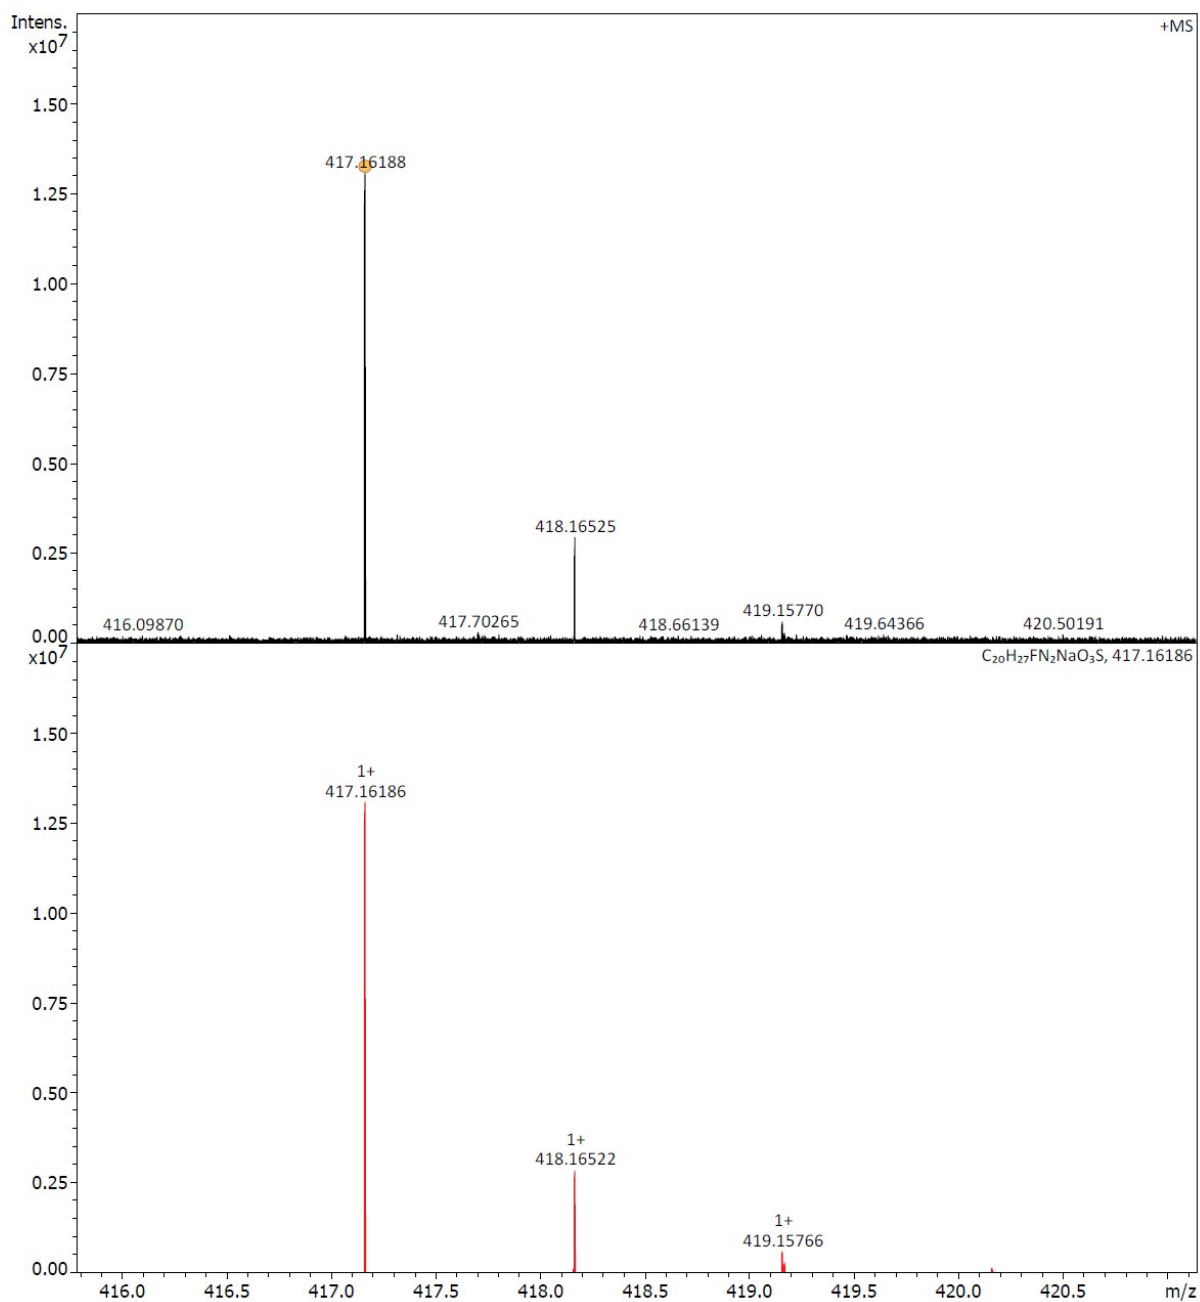

**Figure S79.** HRMS spectrum for methyl (1-(5-fluoropentyl)-1*H*-indole-3-carbonyl)-*R*-methioninate (*R*-MET-5F-PICA, **42**).

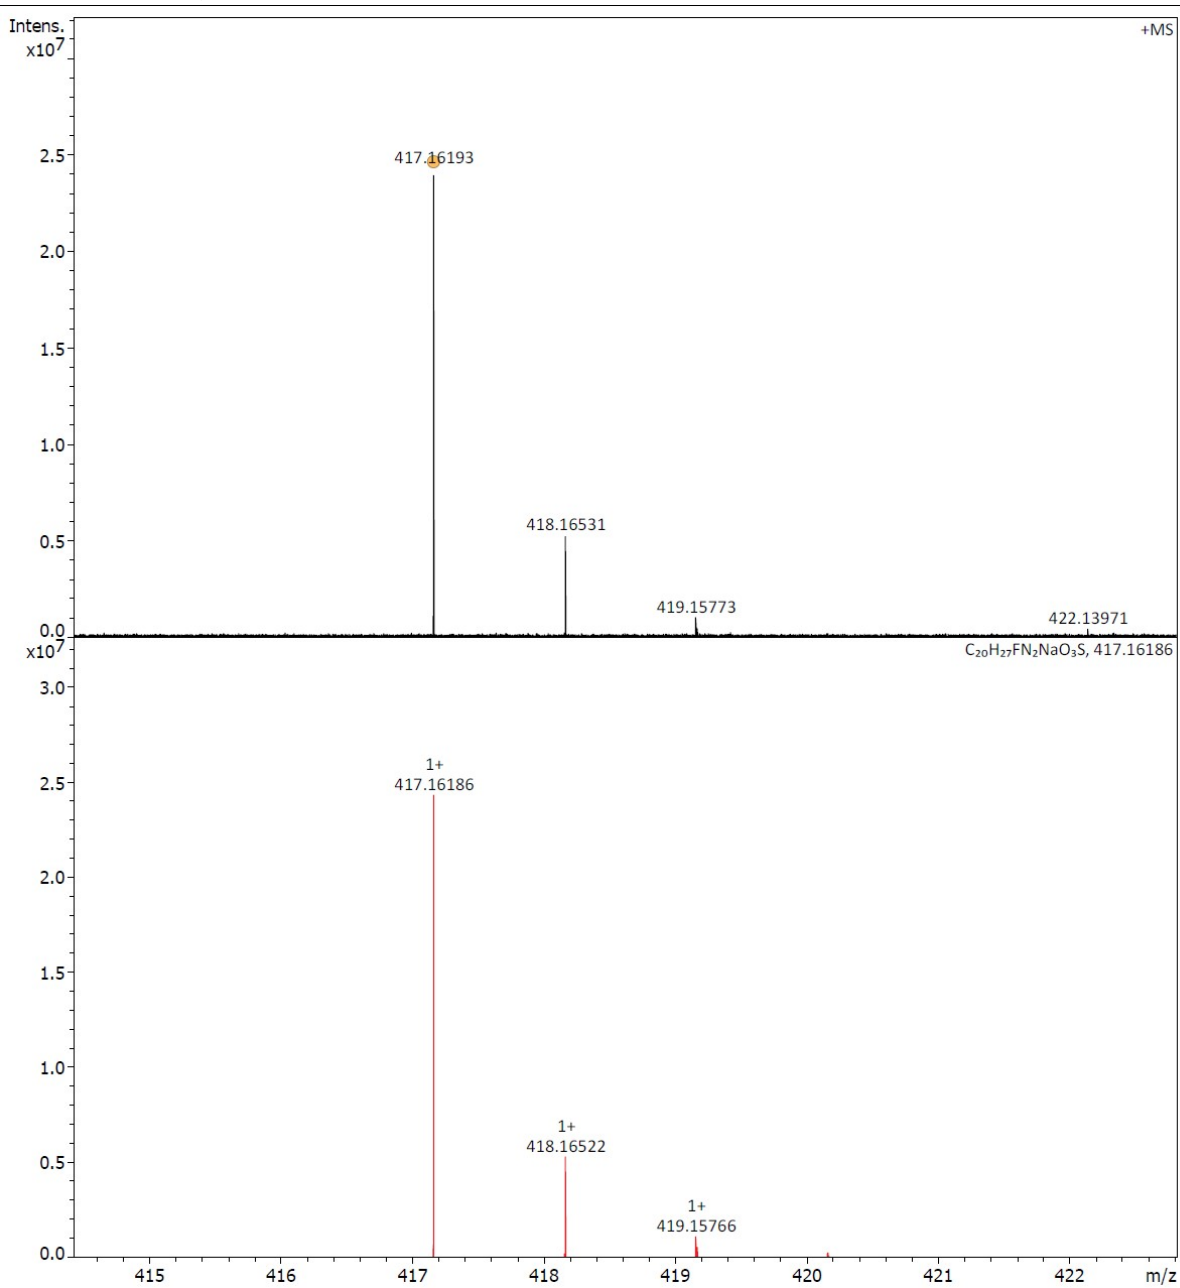



**Figure S80.** HRMS spectrum for methyl (S)-5-amino-2-(1-(5-fluoropentyl)-1*H*-indole-3-carboxamido)-5-oxopentanoate (*S*-GLN-5F-PICA, **43**).

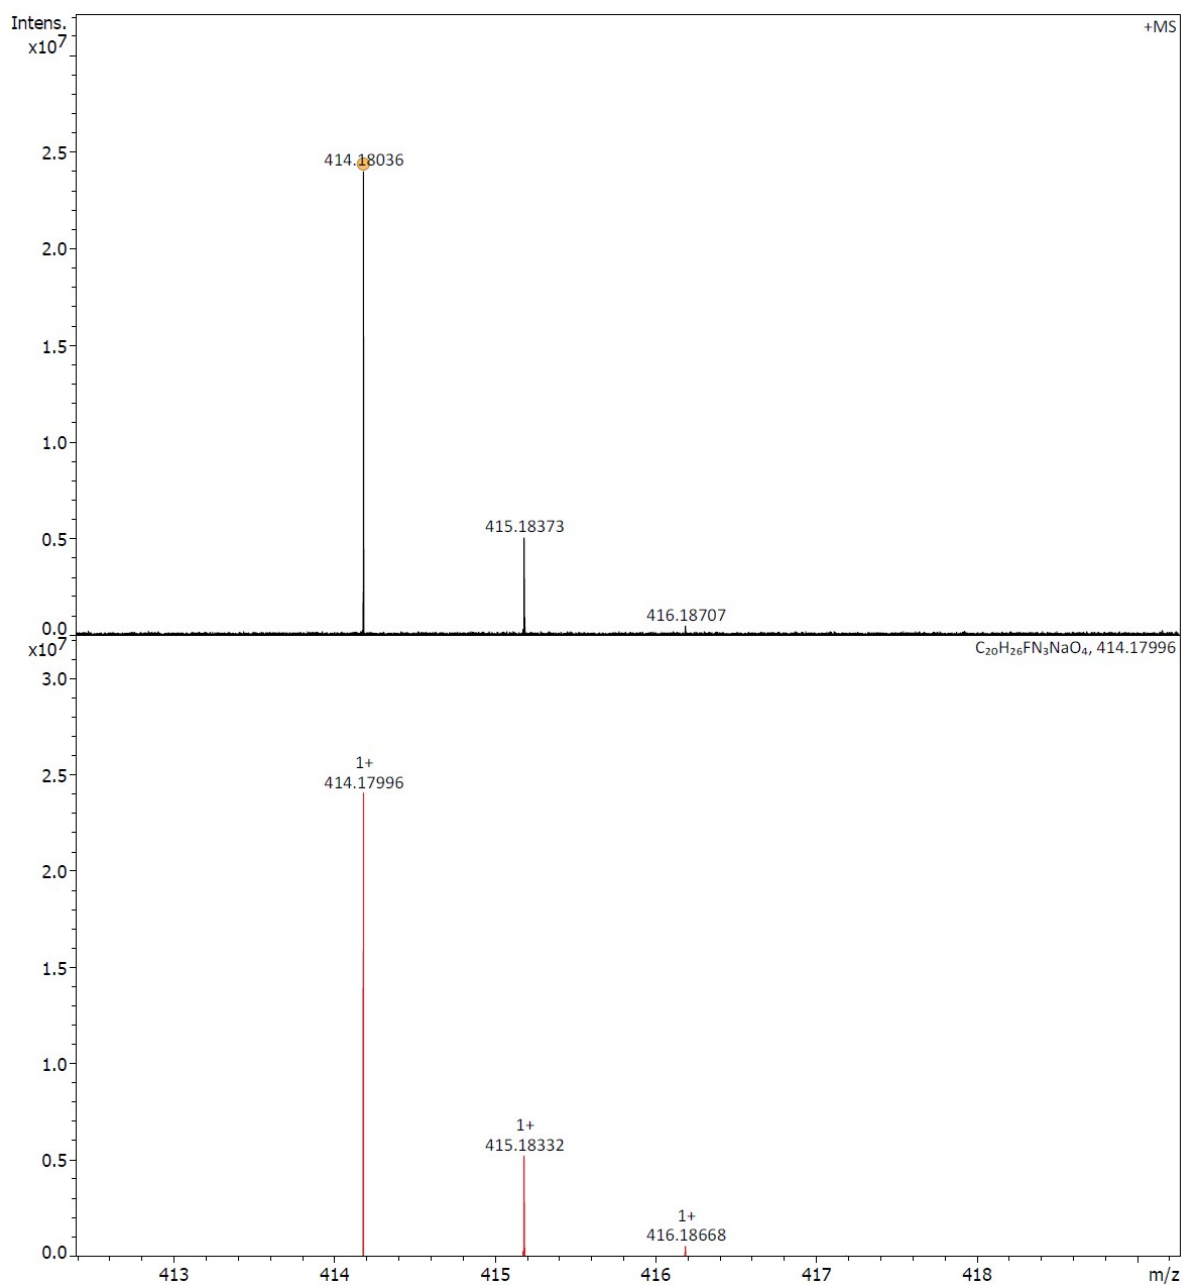

**Figure S81.** HRMS spectrum for methyl (R)-5-amino-2-(1-(5-fluoropentyl)-1*H*-indole-3-carboxamido)-5-oxopentanoate (*R*-GLN-5F-PICA, **44**).

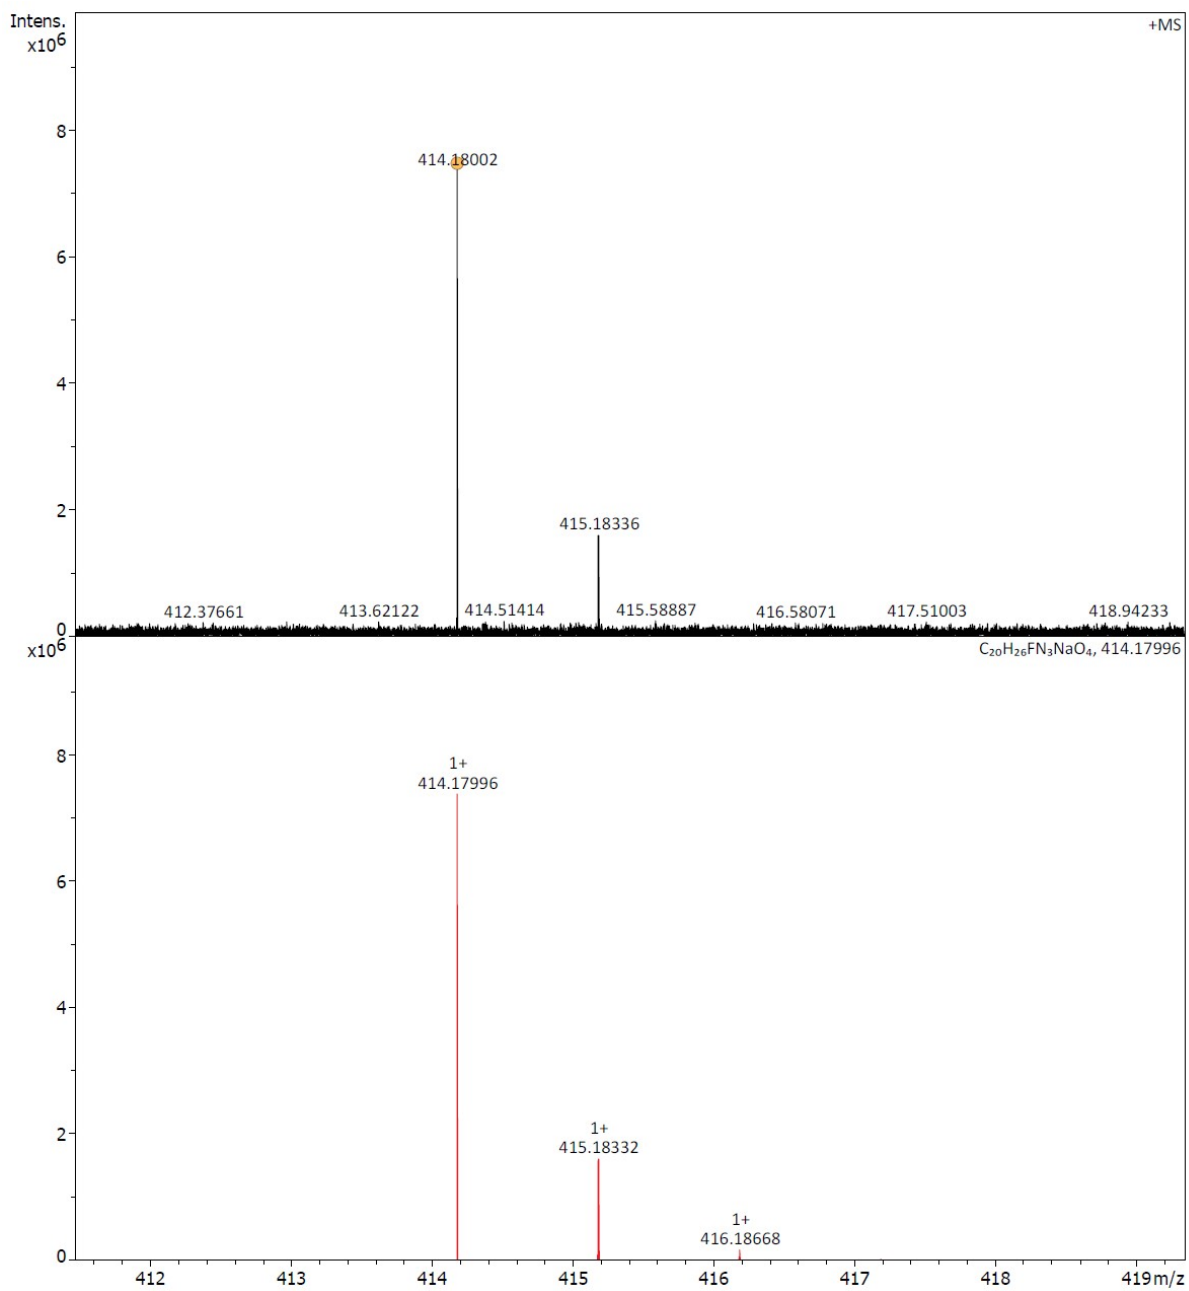

Supplement: d3md00758h1.pdf [file d3md00758h1.pdf]
